# Supplementary material for: A thermodynamic study of selective solvation in solvent mixtures
Source: Royal Society of Chemistry journal article supplement (doi:10.1039/b927107d), 2010-01-01

## **A Thermodynamic Study of Selective Solvation in Solvent Mixtures**

**Rafel Cabot and Christopher A. Hunter\***

### SUPPLEMENTARY INFORMATION

#### 1. Fits to Equation 6.

- 1.1. Chloroform – Carbon tetrachloride
- 1.2. Chloroform – Acetone
- 1.3. Chloroform – Dichloromethane

#### 2. Fits to Equation 10.

- 2.1. Benzene – Carbon tetrachloride
- 2.2. Benzene – Dichloromethane
- 2.3. Chloroform – 1,4-Dioxane
- 2.4. Chloroform – Acetone
- 2.5. Chloroform – Benzene
- 2.6. Chloroform – Carbon tetrachloride
- 2.7. Chloroform – Dichloromethane
- 2.8. Chloroform – Dimethyl sulfoxide
- 2.9. Cyclohexane – Benzene
- 2.10. Cyclohexane – Carbon tetrachloride
- 2.11. Cyclohexane – Chloroform
- 2.12. Dodecane – Chloroform
- 2.13. Octane – Chloroform

## 1. Fits to Equation 6.

### 1.1. Chloroform-Carbon tetrachloride

| Expt                                                                                                                                                                                                                                                                                                                                                                                                                                                                                                                                   | CHCl <sub>3</sub> |     | vol total / $\mu$ l | CCl <sub>4</sub> |                  | $\rho_{exp}$ / ppm | $\rho_{ref}$ / ppm | $\rho_{exp}$ / ppm | [S1]  | [S2]  | [A-S2] | $\rho$ calc  | $\Delta\rho$ / ppm | Kb 2 / M-1 | error |          |
|----------------------------------------------------------------------------------------------------------------------------------------------------------------------------------------------------------------------------------------------------------------------------------------------------------------------------------------------------------------------------------------------------------------------------------------------------------------------------------------------------------------------------------------|-------------------|-----|---------------------|------------------|------------------|--------------------|--------------------|--------------------|-------|-------|--------|--------------|--------------------|------------|-------|----------|
|                                                                                                                                                                                                                                                                                                                                                                                                                                                                                                                                        | S1                | S2  |                     | vol S1 / $\mu$ l | vol S2 / $\mu$ l |                    |                    |                    |       |       |        |              | -1.3659            |            |       | 4.49E-02 |
| 1                                                                                                                                                                                                                                                                                                                                                                                                                                                                                                                                      | 1                 | 0   | 600                 | 600              | 0                | 49.0296            | 18.4622            | 48.5474            | 12.50 | 0.00  | 0.000  | 48.5474      | 0.0000             |            |       |          |
| 2                                                                                                                                                                                                                                                                                                                                                                                                                                                                                                                                      | 0.9               | 0.1 | 600                 | 540              | 60               | 48.8636            | 18.4448            | 48.4047            | 11.25 | 4.15  | 0.016  | 48.4488      | 0.0019             |            |       |          |
| 3                                                                                                                                                                                                                                                                                                                                                                                                                                                                                                                                      | 0.8               | 0.2 | 600                 | 480              | 120              | 48.6984            | 18.4486            | 48.2298            | 10.00 | 8.29  | 0.036  | 48.3239      | 0.0100             |            |       |          |
| 4                                                                                                                                                                                                                                                                                                                                                                                                                                                                                                                                      | 0.7               | 0.3 | 600                 | 420              | 180              | 48.5007            | 18.4578            | 48.0223            | 8.75  | 12.44 | 0.060  | 48.1839      | 0.0259             |            |       |          |
| 5                                                                                                                                                                                                                                                                                                                                                                                                                                                                                                                                      | 0.6               | 0.4 | 600                 | 360              | 240              | 48.2786            | 18.4500            | 47.8098            | 7.50  | 16.58 | 0.090  | 48.0002      | 0.0367             |            |       |          |
| 6                                                                                                                                                                                                                                                                                                                                                                                                                                                                                                                                      | 0.5               | 0.5 | 600                 | 300              | 300              | 48.0211            | 18.4421            | 47.5590            | 6.25  | 20.73 | 0.150  | 47.7621      | 0.0412             |            |       |          |
| 7                                                                                                                                                                                                                                                                                                                                                                                                                                                                                                                                      | 0.4               | 0.6 | 600                 | 240              | 360              | 47.7137            | 18.4435            | 47.2502            | 5.00  | 24.87 | 0.182  | 47.4410      | 0.0364             |            |       |          |
| 8                                                                                                                                                                                                                                                                                                                                                                                                                                                                                                                                      | 0.3               | 0.7 | 600                 | 180              | 420              | 47.3188            | 18.4515            | 46.8473            | 3.75  | 29.02 | 0.258  | 46.9848      | 0.0189             |            |       |          |
| 9                                                                                                                                                                                                                                                                                                                                                                                                                                                                                                                                      | 0.2               | 0.8 | 600                 | 120              | 480              | 46.8931            | 18.5621            | 46.3110            | 2.50  | 33.16 | 0.373  | 46.2852      | 0.0007             |            |       |          |
| 10                                                                                                                                                                                                                                                                                                                                                                                                                                                                                                                                     | 0.1               | 0.9 | 600                 | 60               | 540              | 45.9498            | 18.4424            | 45.4874            | 1.25  | 37.31 | 0.573  | 45.0763      | 0.1690             |            |       |          |
| 11                                                                                                                                                                                                                                                                                                                                                                                                                                                                                                                                     | 0                 | 1   | 600                 | 0                | 600              | 42.9470            | 18.4424            | 42.4946            | 0.00  | 41.45 | 1.000  | 42.4946      | 0.0000             |            |       |          |
|                                                                                                                                                                                                                                                                                                                                                                                                                                                                                                                                        |                   |     | total vol of stock  | 3300             | 3300             |                    |                    | -8.06              |       |       |        | ss residuals | 0.3408             |            |       |          |
| <p><math>\rho</math> 48.5474 42.4946 92 uncorrected 43.9505</p> <p>conc / M 12.498 41.451</p> <p>FW 119.38 153.82</p> <p>density 1.492 1.594</p> <p>N sites 1 4</p> <p><b>Phosphine Oxide</b></p> <p>FW 218.32 weight / g 0.0103 0.0095</p> <p>p 97% weight solvent / g 7.3000 7.1933</p> <p>V solvent / mL 4.8328 4.5127</p> <p>conc / mM 3.3532 3.3532</p> <p><b>External Reference</b></p> <p>Methylenediphosphonic acid</p> <p>Md / ppm 17.98</p> <p>FW 176.00</p> <p>weight / g 0.0177</p> <p>V / mL 2</p> <p>conc / mM 50.28</p> |                   |     |                     |                  |                  |                    |                    |                    |       |       |        |              |                    |            |       |          |

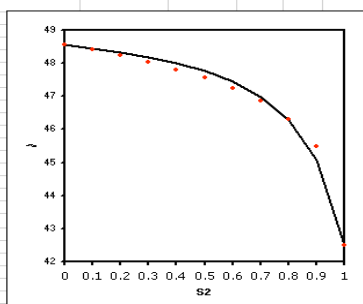

| Expt                                                                                                                                                                                                                                                                                                                                                                                                                                                                                                                                   | CHCl <sub>3</sub> |     | vol total / $\mu$ l | CCl <sub>4</sub> |                  | $\rho_{exp}$ / ppm | $\rho_{ref}$ / ppm | $\rho_{exp}$ / ppm | [S1]  | [S2]  | [A-S2] | $\rho$ calc  | $\Delta\rho$ / ppm | Kb 2 / M-1 | error |          |
|----------------------------------------------------------------------------------------------------------------------------------------------------------------------------------------------------------------------------------------------------------------------------------------------------------------------------------------------------------------------------------------------------------------------------------------------------------------------------------------------------------------------------------------|-------------------|-----|---------------------|------------------|------------------|--------------------|--------------------|--------------------|-------|-------|--------|--------------|--------------------|------------|-------|----------|
|                                                                                                                                                                                                                                                                                                                                                                                                                                                                                                                                        | S1                | S2  |                     | vol S1 / $\mu$ l | vol S2 / $\mu$ l |                    |                    |                    |       |       |        |              | -1.4171            |            |       | 4.67E-02 |
| 1                                                                                                                                                                                                                                                                                                                                                                                                                                                                                                                                      | 1                 | 0   | 600                 | 600              | 0                | 49.0376            | 18.4422            | 48.5754            | 12.50 | 0.00  | 0.000  | 48.5754      | 0.0000             |            |       |          |
| 2                                                                                                                                                                                                                                                                                                                                                                                                                                                                                                                                      | 0.9               | 0.1 | 600                 | 540              | 60               | 48.7939            | 18.4448            | 48.3291            | 11.25 | 4.15  | 0.017  | 48.4732      | 0.0208             |            |       |          |
| 3                                                                                                                                                                                                                                                                                                                                                                                                                                                                                                                                      | 0.8               | 0.2 | 600                 | 480              | 120              | 48.6396            | 18.4439            | 48.2357            | 10.00 | 8.29  | 0.037  | 48.3502      | 0.0131             |            |       |          |
| 4                                                                                                                                                                                                                                                                                                                                                                                                                                                                                                                                      | 0.7               | 0.3 | 600                 | 420              | 180              | 48.5000            | 18.4488            | 48.0312            | 8.75  | 12.44 | 0.062  | 48.1993      | 0.0283             |            |       |          |
| 5                                                                                                                                                                                                                                                                                                                                                                                                                                                                                                                                      | 0.6               | 0.4 | 600                 | 360              | 240              | 48.2873            | 18.4390            | 47.8293            | 7.50  | 16.58 | 0.094  | 48.0099      | 0.0330             |            |       |          |
| 6                                                                                                                                                                                                                                                                                                                                                                                                                                                                                                                                      | 0.5               | 0.5 | 600                 | 300              | 300              | 48.0128            | 18.4426            | 47.5502            | 6.25  | 20.73 | 0.154  | 47.7651      | 0.0462             |            |       |          |
| 7                                                                                                                                                                                                                                                                                                                                                                                                                                                                                                                                      | 0.4               | 0.6 | 600                 | 240              | 360              | 47.7341            | 18.4509            | 47.2632            | 5.00  | 24.87 | 0.189  | 47.4364      | 0.0300             |            |       |          |
| 8                                                                                                                                                                                                                                                                                                                                                                                                                                                                                                                                      | 0.3               | 0.7 | 600                 | 180              | 420              | 47.3124            | 18.4556            | 46.8368            | 3.75  | 29.02 | 0.266  | 46.9716      | 0.0182             |            |       |          |
| 9                                                                                                                                                                                                                                                                                                                                                                                                                                                                                                                                      | 0.2               | 0.8 | 600                 | 120              | 480              | 46.7817            | 18.4476            | 46.3141            | 2.50  | 33.16 | 0.383  | 46.2643      | 0.0029             |            |       |          |
| 10                                                                                                                                                                                                                                                                                                                                                                                                                                                                                                                                     | 0.1               | 0.9 | 600                 | 60               | 540              | 45.9219            | 18.4422            | 45.4597            | 1.25  | 37.31 | 0.552  | 45.0579      | 0.1615             |            |       |          |
| 11                                                                                                                                                                                                                                                                                                                                                                                                                                                                                                                                     | 0                 | 1   | 600                 | 0                | 600              | 43.0227            | 18.4673            | 42.5354            | 0.00  | 41.45 | 1.000  | 42.5354      | 0.0000             |            |       |          |
|                                                                                                                                                                                                                                                                                                                                                                                                                                                                                                                                        |                   |     | total vol of stock  | 3300             | 3300             |                    |                    | -8.04              |       |       |        | ss residuals | 0.3534             |            |       |          |
| <p><math>\rho</math> 48.5754 42.5354 92 uncorrected 43.9526</p> <p>conc / M 12.498 41.451</p> <p>FW 119.38 153.82</p> <p>density 1.492 1.594</p> <p>N sites 1 4</p> <p><b>Phosphine Oxide</b></p> <p>FW 218.32 weight / g 0.0101 0.0113</p> <p>p 97% weight solvent / g 7.3791 8.8202</p> <p>V solvent / mL 4.9450 5.5334</p> <p>conc / mM 3.0733 3.0733</p> <p><b>External Reference</b></p> <p>Methylenediphosphonic acid</p> <p>Md / ppm 17.98</p> <p>FW 176.00</p> <p>weight / g 0.0177</p> <p>V / mL 2</p> <p>conc / mM 50.28</p> |                   |     |                     |                  |                  |                    |                    |                    |       |       |        |              |                    |            |       |          |

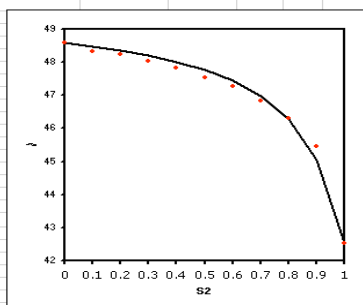

## 1.2. Chloroform-Acetone

| Expt | CHCl <sub>3</sub> Acetone |     | vol total / $\mu$ l        | CHCl <sub>3</sub> Acetone |                   | $\rho_{exp}$ / g / cm <sup>3</sup> | $\rho_{ref}$ / g / cm <sup>3</sup> | $\rho_{calc}$ / g / cm <sup>3</sup> | [S1]  | [S2]  | [A-S2]       | $\rho$ calc | $\rho$ error | $\Delta G$ / kJ/mol | Kb 2 / M-1 | error |       |
|------|---------------------------|-----|----------------------------|---------------------------|-------------------|------------------------------------|------------------------------------|-------------------------------------|-------|-------|--------------|-------------|--------------|---------------------|------------|-------|-------|
|      | S1                        | S2  |                            | vol S1 / $\mu$ l          | vol S2 / $\mu$ l  |                                    |                                    |                                     |       |       |              |             |              |                     |            |       | 14132 |
| 1    | 1                         | 0   | 600                        | 600                       | 0                 | 49.0029                            | 18.4444                            | 48.5395                             | 12.50 | 0.000 | 0.000        | 48.5395     | 0.0000       |                     |            |       |       |
| 2    | 0.9                       | 0.1 | 600                        | 540                       | 60                | 49.0544                            | 18.3372                            | 48.5472                             | 11.25 | 8.17  | 0.012        | 48.4552     | 0.0221       |                     |            |       |       |
| 3    | 0.8                       | 0.2 | 600                        | 480                       | 120               | 49.1352                            | 18.4469                            | 48.6683                             | 10.00 | 16.34 | 0.027        | 48.4424     | 0.0510       |                     |            |       |       |
| 4    | 0.7                       | 0.3 | 600                        | 420                       | 180               | 49.0876                            | 18.4534                            | 48.6142                             | 8.75  | 24.51 | 0.045        | 48.3769     | 0.0563       |                     |            |       |       |
| 5    | 0.6                       | 0.4 | 600                        | 360                       | 240               | 48.9794                            | 18.4470                            | 48.5114                             | 7.50  | 32.69 | 0.068        | 48.2933     | 0.0476       |                     |            |       |       |
| 6    | 0.5                       | 0.5 | 600                        | 300                       | 300               | 48.8042                            | 18.4469                            | 48.3384                             | 6.25  | 40.86 | 0.099        | 48.1628     | 0.0242       |                     |            |       |       |
| 7    | 0.4                       | 0.6 | 600                        | 240                       | 360               | 48.5790                            | 18.4555                            | 48.1025                             | 5.00  | 49.03 | 0.142        | 48.0302     | 0.0052       |                     |            |       |       |
| 8    | 0.3                       | 0.7 | 600                        | 180                       | 420               | 48.2622                            | 18.4622                            | 47.7800                             | 3.75  | 57.20 | 0.204        | 47.8055     | 0.0006       |                     |            |       |       |
| 9    | 0.2                       | 0.8 | 600                        | 120                       | 480               | 47.8053                            | 18.4483                            | 47.3370                             | 2.50  | 65.37 | 0.306        | 47.4420     | 0.0110       |                     |            |       |       |
| 10   | 0.1                       | 0.9 | 600                        | 60                        | 540               | 47.3096                            | 18.4484                            | 46.6412                             | 1.25  | 73.54 | 0.498        | 46.7536     | 0.0126       |                     |            |       |       |
| 11   | 0                         | 1   | 600                        | 0                         | 600               | 45.4452                            | 18.4727                            | 44.9525                             | 0.00  | 81.71 | 1.000        | 44.9525     | 0.0000       |                     |            |       |       |
|      |                           |     | total vol of stock         | 3300                      | 3300              |                                    |                                    | -3.59                               |       |       | ss residuals | 0.2338      |              |                     |            |       |       |
|      |                           |     | $\rho$ uncorrected         |                           |                   |                                    |                                    |                                     |       |       |              |             |              |                     |            |       |       |
|      |                           |     | $\rho$                     | 48.5385                   | 44.9525           |                                    |                                    |                                     |       |       |              |             |              |                     |            |       |       |
|      |                           |     | conc / M                   | 12.439                    | 81.716            |                                    |                                    |                                     |       |       |              |             |              |                     |            |       |       |
|      |                           |     | FW                         | 119.38                    | 58.08             |                                    |                                    |                                     |       |       |              |             |              |                     |            |       |       |
|      |                           |     | density                    | 1.492                     | 0.791             |                                    |                                    |                                     |       |       |              |             |              |                     |            |       |       |
|      |                           |     | N sites                    | 1                         | 6                 |                                    |                                    |                                     |       |       |              |             |              |                     |            |       |       |
|      |                           |     | Phosphine Oxide            |                           |                   |                                    |                                    |                                     |       |       |              |             |              |                     |            |       |       |
|      |                           |     | weight / g                 |                           | CHCl <sub>3</sub> | Acetone                            |                                    |                                     |       |       |              |             |              |                     |            |       |       |
|      |                           |     | FW                         | 218.32                    | 0.0111            | 0.0119                             |                                    |                                     |       |       |              |             |              |                     |            |       |       |
|      |                           |     | p                          | 97%                       | 7.4123            | 4.2129                             | 5.0416                             |                                     |       |       |              |             |              |                     |            |       |       |
|      |                           |     | V solvent / mL             |                           | 4.9680            | 5.3261                             |                                    |                                     |       |       |              |             |              |                     |            |       |       |
|      |                           |     | conc / mM                  |                           | 9.9270            | 9.9270                             |                                    |                                     |       |       |              |             |              |                     |            |       |       |
|      |                           |     | External Reference         |                           |                   |                                    |                                    |                                     |       |       |              |             |              |                     |            |       |       |
|      |                           |     | Methylenediphosphonic acid |                           |                   |                                    |                                    |                                     |       |       |              |             |              |                     |            |       |       |
|      |                           |     | M <sub>d</sub> / ppm       |                           |                   |                                    |                                    |                                     |       |       |              |             |              |                     |            |       |       |
|      |                           |     | FW                         |                           |                   |                                    |                                    |                                     |       |       |              |             |              |                     |            |       |       |
|      |                           |     | weight / g                 |                           |                   |                                    |                                    |                                     |       |       |              |             |              |                     |            |       |       |
|      |                           |     | V / mL                     |                           |                   |                                    |                                    |                                     |       |       |              |             |              |                     |            |       |       |
|      |                           |     | conc / mM                  |                           |                   |                                    |                                    |                                     |       |       |              |             |              |                     |            |       |       |

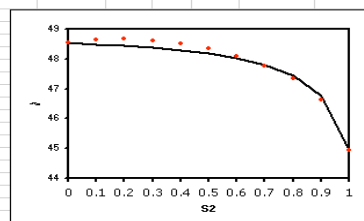

| Expt | CHCl <sub>3</sub> Acetone |     | vol total / $\mu$ l        | CHCl <sub>3</sub> Acetone |                   | $\rho_{exp}$ / g / cm <sup>3</sup> | $\rho_{ref}$ / g / cm <sup>3</sup> | $\rho_{calc}$ / g / cm <sup>3</sup> | [S1]  | [S2]  | [A-S2]       | $\rho$ calc | $\rho$ error | $\Delta G$ / kJ/mol | Kb 2 / M-1 | error |       |
|------|---------------------------|-----|----------------------------|---------------------------|-------------------|------------------------------------|------------------------------------|-------------------------------------|-------|-------|--------------|-------------|--------------|---------------------|------------|-------|-------|
|      | S1                        | S2  |                            | vol S1 / $\mu$ l          | vol S2 / $\mu$ l  |                                    |                                    |                                     |       |       |              |             |              |                     |            |       | 16316 |
| 1    | 1                         | 0   | 600                        | 600                       | 0                 | 49.0411                            | 18.4433                            | 48.5778                             | 12.50 | 0.000 | 0.000        | 48.5778     | 0.0000       |                     |            |       |       |
| 2    | 0.9                       | 0.1 | 600                        | 540                       | 60                | 49.1207                            | 18.4438                            | 48.6563                             | 11.25 | 8.17  | 0.014        | 48.5285     | 0.0165       |                     |            |       |       |
| 3    | 0.8                       | 0.2 | 600                        | 480                       | 120               | 49.1435                            | 18.4441                            | 48.6794                             | 10.00 | 16.34 | 0.030        | 48.4688     | 0.0444       |                     |            |       |       |
| 4    | 0.7                       | 0.3 | 600                        | 420                       | 180               | 49.0830                            | 18.4496                            | 48.6134                             | 8.75  | 24.51 | 0.050        | 48.3948     | 0.0478       |                     |            |       |       |
| 5    | 0.6                       | 0.4 | 600                        | 360                       | 240               | 48.9714                            | 18.4446                            | 48.5068                             | 7.50  | 32.69 | 0.076        | 48.3009     | 0.0424       |                     |            |       |       |
| 6    | 0.5                       | 0.5 | 600                        | 300                       | 300               | 48.8023                            | 18.4432                            | 48.3291                             | 6.25  | 40.86 | 0.110        | 48.1777     | 0.0261       |                     |            |       |       |
| 7    | 0.4                       | 0.6 | 600                        | 240                       | 360               | 48.5725                            | 18.4538                            | 48.0987                             | 5.00  | 49.03 | 0.156        | 48.0089     | 0.0081       |                     |            |       |       |
| 8    | 0.3                       | 0.7 | 600                        | 180                       | 420               | 48.2532                            | 18.4579                            | 47.7753                             | 3.75  | 57.20 | 0.224        | 47.7636     | 0.0001       |                     |            |       |       |
| 9    | 0.2                       | 0.8 | 600                        | 120                       | 480               | 47.7947                            | 18.4469                            | 47.3288                             | 2.50  | 65.37 | 0.331        | 47.3744     | 0.0021       |                     |            |       |       |
| 10   | 0.1                       | 0.9 | 600                        | 60                        | 540               | 46.3193                            | 18.4472                            | 46.4521                             | 1.25  | 73.54 | 0.527        | 46.8522     | 0.0441       |                     |            |       |       |
| 11   | 0                         | 1   | 600                        | 0                         | 600               | 45.4254                            | 18.4686                            | 44.9398                             | 0.00  | 81.71 | 1.000        | 44.9398     | 0.0000       |                     |            |       |       |
|      |                           |     | total vol of stock         | 3300                      | 3300              |                                    |                                    | -3.64                               |       |       | ss residuals | 0.2315      |              |                     |            |       |       |
|      |                           |     | $\rho$ uncorrected         |                           |                   |                                    |                                    |                                     |       |       |              |             |              |                     |            |       |       |
|      |                           |     | $\rho$                     | 48.5778                   | 44.9398           |                                    |                                    |                                     |       |       |              |             |              |                     |            |       |       |
|      |                           |     | conc / M                   | 12.438                    | 81.716            |                                    |                                    |                                     |       |       |              |             |              |                     |            |       |       |
|      |                           |     | FW                         | 119.38                    | 58.08             |                                    |                                    |                                     |       |       |              |             |              |                     |            |       |       |
|      |                           |     | density                    | 1.492                     | 0.791             |                                    |                                    |                                     |       |       |              |             |              |                     |            |       |       |
|      |                           |     | N sites                    | 1                         | 6                 |                                    |                                    |                                     |       |       |              |             |              |                     |            |       |       |
|      |                           |     | Phosphine Oxide            |                           |                   |                                    |                                    |                                     |       |       |              |             |              |                     |            |       |       |
|      |                           |     | weight / g                 |                           | CHCl <sub>3</sub> | Acetone                            |                                    |                                     |       |       |              |             |              |                     |            |       |       |
|      |                           |     | FW                         | 218.32                    | 0.0106            | 0.0108                             | 4.9403                             |                                     |       |       |              |             |              |                     |            |       |       |
|      |                           |     | p                          | 97%                       | 7.3970            | 3.9956                             |                                    |                                     |       |       |              |             |              |                     |            |       |       |
|      |                           |     | V solvent / mL             |                           | 4.9578            | 5.0513                             |                                    |                                     |       |       |              |             |              |                     |            |       |       |
|      |                           |     | conc / mM                  |                           | 9.4394            | 9.4394                             |                                    |                                     |       |       |              |             |              |                     |            |       |       |
|      |                           |     | External Reference         |                           |                   |                                    |                                    |                                     |       |       |              |             |              |                     |            |       |       |
|      |                           |     | Methylenediphosphonic acid |                           |                   |                                    |                                    |                                     |       |       |              |             |              |                     |            |       |       |
|      |                           |     | M <sub>d</sub> / ppm       |                           |                   |                                    |                                    |                                     |       |       |              |             |              |                     |            |       |       |
|      |                           |     | FW                         |                           |                   |                                    |                                    |                                     |       |       |              |             |              |                     |            |       |       |
|      |                           |     | weight / g                 |                           |                   |                                    |                                    |                                     |       |       |              |             |              |                     |            |       |       |
|      |                           |     | V / mL                     |                           |                   |                                    |                                    |                                     |       |       |              |             |              |                     |            |       |       |
|      |                           |     | conc / mM                  |                           |                   |                                    |                                    |                                     |       |       |              |             |              |                     |            |       |       |

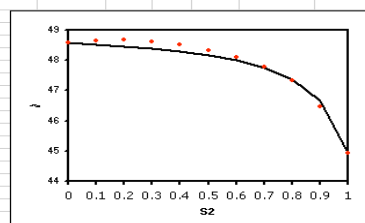

### 1.3. Chloroform-Dichloromethane

| Expt | CHCl <sub>3</sub> DCM |     | vol total / $\mu$ l | CHCl <sub>3</sub> DCM |                  | $\delta_{exp}$ / ppm | $\delta_{ref}$ / ppm | $\delta_{exp}$ / ppm | [S1]  | [S2]  | [A-S2] | $\rho$ calc  | $\rho$ error | $\Delta G$ / kJ/mol | Kb 2 / M-1 | error                 |
|------|-----------------------|-----|---------------------|-----------------------|------------------|----------------------|----------------------|----------------------|-------|-------|--------|--------------|--------------|---------------------|------------|-----------------------|
|      | S1                    | S2  |                     | vol S1 / $\mu$ l      | vol S2 / $\mu$ l |                      |                      |                      |       |       |        |              |              |                     |            |                       |
| 1    | 1                     | 0   | 600                 | 600                   | 0                | 48.7707              | 19.0399              | 48.7108              | 12.50 | 0.000 | 0.000  | 48.7108      | 0.0000       |                     |            |                       |
| 2    | 0.9                   | 0.1 | 600                 | 540                   | 60               | 48.7264              | 19.0375              | 48.6526              | 11.25 | 3.12  | 0.037  | 48.6404      | 0.0008       |                     |            |                       |
| 3    | 0.8                   | 0.2 | 600                 | 480                   | 120              | 48.6353              | 19.0386              | 48.5767              | 10.00 | 6.24  | 0.080  | 48.5594      | 0.0003       | $\Delta$ alpha 0    | -0.47      | 0                     |
| 4    | 0.7                   | 0.3 | 600                 | 420                   | 180              | 48.5431              | 19.0413              | 48.4818              | 8.75  | 9.36  | 0.130  | 48.4653      | 0.0003       | $\Delta$ alpha 1    | -0.51      | 0.8 CHCl <sub>3</sub> |
| 5    | 0.6                   | 0.4 | 600                 | 360                   | 240              | 48.4130              | 19.0392              | 48.3538              | 7.50  | 12.48 | 0.189  | 48.2546      | 0.0000       | $\Delta$ alpha 2    | -0.53      | 11 DCM                |
| 6    | 0.5                   | 0.5 | 600                 | 300                   | 300              | 48.2889              | 19.0376              | 48.2414              | 6.25  | 15.60 | 0.259  | 48.2226      | 0.0004       |                     |            |                       |
| 7    | 0.4                   | 0.6 | 600                 | 240                   | 360              | 48.1386              | 19.0397              | 48.0789              | 5.00  | 18.72 | 0.344  | 48.0624      | 0.0003       |                     |            |                       |
| 8    | 0.3                   | 0.7 | 600                 | 180                   | 420              | 48.9360              | 19.0603              | 47.9557              | 3.75  | 21.84 | 0.449  | 47.8638      | 0.0001       |                     |            |                       |
| 9    | 0.2                   | 0.8 | 600                 | 120                   | 480              | 48.6745              | 19.0496              | 47.6049              | 2.50  | 24.96 | 0.583  | 47.6113      | 0.0000       |                     |            |                       |
| 10   | 0.1                   | 0.9 | 600                 | 60                    | 540              | 48.3044              | 19.0476              | 47.2368              | 1.25  | 28.08 | 0.759  | 47.2795      | 0.0018       |                     |            |                       |
| 11   | 0                     | 1   | 600                 | 0                     | 600              | 47.9189              | 19.0751              | 46.8238              | 0.00  | 31.20 | 1.000  | 46.8238      | 0.0000       |                     |            |                       |
|      |                       |     | total vol of stock  | 3300                  | 3300             |                      |                      | -1.88                |       |       |        | ss residuals | 0.0039       |                     |            |                       |

  

| $\rho$ uncorrected |         |         |         |
|--------------------|---------|---------|---------|
| $\rho$             | 48.7108 | 46.8238 | 46.2834 |
| conc / M           | 12.498  | 31.202  |         |
| FW                 | 118.38  | 84.93   |         |
| density            | 1.492   | 1.325   |         |
| N sites            | 1       | 2       |         |

  

| Phosphine Oxide |        | CHCl <sub>3</sub>  | DCM    |        |
|-----------------|--------|--------------------|--------|--------|
| FW              | 218.32 | weight / g         | 0.0100 | 0.0110 |
| p               | 97%    | weight solvent / g | 7.4264 | 7.2547 |
|                 |        | V solvent / mL     | 4.9775 | 5.4742 |
|                 |        | conc / mM          | 8.9262 | 8.9279 |

  

| External Reference         |        |
|----------------------------|--------|
| Methylenediphosphonic acid |        |
| M <sub>d</sub> / ppm       | 17.96  |
| FW                         | 176.00 |
| weight / g                 | 0.0177 |
| V / mL                     | 2      |
| conc / mM                  | 50.28  |

  

| Expt | CHCl <sub>3</sub> DCM |     | vol total / $\mu$ l | CHCl <sub>3</sub> DCM |                  | $\delta_{exp}$ / ppm | $\delta_{ref}$ / ppm | $\delta_{exp}$ / ppm | [S1]  | [S2]  | [A-S2] | $\rho$ calc  | $\rho$ error | $\Delta G$ / kJ/mol | Kb 2 / M-1 | error                 |
|------|-----------------------|-----|---------------------|-----------------------|------------------|----------------------|----------------------|----------------------|-------|-------|--------|--------------|--------------|---------------------|------------|-----------------------|
|      | S1                    | S2  |                     | vol S1 / $\mu$ l      | vol S2 / $\mu$ l |                      |                      |                      |       |       |        |              |              |                     |            |                       |
| 1    | 1                     | 0   | 600                 | 600                   | 0                | 48.7767              | 19.0443              | 48.7124              | 12.50 | 0.000 | 0.000  | 48.7124      | 0.0000       |                     |            |                       |
| 2    | 0.9                   | 0.1 | 600                 | 540                   | 60               | 48.7001              | 19.0446              | 48.6355              | 11.25 | 3.12  | 0.039  | 48.6298      | 0.0000       |                     |            |                       |
| 3    | 0.8                   | 0.2 | 600                 | 480                   | 120              | 48.6225              | 19.0449              | 48.5576              | 10.00 | 6.24  | 0.083  | 48.5566      | 0.0000       | $\Delta$ alpha 0    | -0.46      | 0                     |
| 4    | 0.7                   | 0.3 | 600                 | 420                   | 180              | 48.5310              | 19.0487              | 48.4623              | 8.75  | 9.36  | 0.134  | 48.4602      | 0.0000       | $\Delta$ alpha 1    | -0.50      | 0.8 CHCl <sub>3</sub> |
| 5    | 0.6                   | 0.4 | 600                 | 360                   | 240              | 48.4094              | 19.0450              | 48.3444              | 7.50  | 12.48 | 0.194  | 48.2472      | 0.0000       | $\Delta$ alpha 2    | -0.52      | 11 DCM                |
| 6    | 0.5                   | 0.5 | 600                 | 300                   | 300              | 48.2636              | 19.0450              | 48.2166              | 6.25  | 15.60 | 0.265  | 48.2131      | 0.0000       |                     |            |                       |
| 7    | 0.4                   | 0.6 | 600                 | 240                   | 360              | 48.1389              | 19.0471              | 48.0718              | 5.00  | 18.72 | 0.351  | 48.0511      | 0.0004       |                     |            |                       |
| 8    | 0.3                   | 0.7 | 600                 | 180                   | 420              | 48.9379              | 19.0680              | 47.8499              | 3.75  | 21.84 | 0.457  | 47.8517      | 0.0000       |                     |            |                       |
| 9    | 0.2                   | 0.8 | 600                 | 120                   | 480              | 48.6731              | 19.0557              | 47.5974              | 2.50  | 24.96 | 0.591  | 47.6001      | 0.0000       |                     |            |                       |
| 10   | 0.1                   | 0.9 | 600                 | 60                    | 540              | 48.3226              | 19.0544              | 47.2482              | 1.25  | 28.08 | 0.765  | 47.2728      | 0.0006       |                     |            |                       |
| 11   | 0                     | 1   | 600                 | 0                     | 600              | 47.9295              | 19.0790              | 46.8295              | 0.00  | 31.20 | 1.000  | 46.8295      | 0.0000       |                     |            |                       |
|      |                       |     | total vol of stock  | 3300                  | 3300             |                      |                      | -1.88                |       |       |        | ss residuals | 0.0011       |                     |            |                       |

  

| $\rho$ uncorrected |         |         |         |
|--------------------|---------|---------|---------|
| $\rho$             | 48.7124 | 46.8295 | 46.6776 |
| conc / M           | 12.498  | 31.202  |         |
| FW                 | 118.38  | 84.93   |         |
| density            | 1.492   | 1.325   |         |
| N sites            | 1       | 2       |         |

  

| Phosphine Oxide |        | CHCl <sub>3</sub>  | DCM    |        |
|-----------------|--------|--------------------|--------|--------|
| FW              | 218.32 | weight / g         | 0.0104 | 0.0108 |
| p               | 97%    | weight solvent / g | 7.4162 | 6.9027 |
|                 |        | V solvent / mL     | 4.9706 | 5.2106 |
|                 |        | conc / mM          | 9.2961 | 9.2944 |

  

| External Reference         |        |
|----------------------------|--------|
| Methylenediphosphonic acid |        |
| M <sub>d</sub> / ppm       | 17.96  |
| FW                         | 176.00 |
| weight / g                 | 0.0177 |
| V / mL                     | 2      |
| conc / mM                  | 50.28  |

## 2. Fits to Equation 10.

### 2.1. Benzene-Carbon tetrachloride

| Expt                       | C6H6    |         | vol total / $\mu$ l | CCl4             |                  | $\delta_{\text{exp}}$ / ppm | $\delta_{\text{ref}}$ / ppm | $\delta_{\text{calc}}$ / ppm | [S1]  | [S2]  | [A-S2] | $\rho$ calc | $\Delta\rho$ / ppm  | Kb 2 / M-1       | error        |            |
|----------------------------|---------|---------|---------------------|------------------|------------------|-----------------------------|-----------------------------|------------------------------|-------|-------|--------|-------------|---------------------|------------------|--------------|------------|
|                            | S1      | S2      |                     | vol S1 / $\mu$ l | vol S2 / $\mu$ l |                             |                             |                              |       |       |        |             | 1.6595              |                  |              | 1.06E+00   |
| 1                          | 1       | 0       | 600                 | 600              | 0                | 42.9894                     | 18.4468                     | 42.5316                      | 67.14 | 0.00  | 0.000  | 42.5316     | 0.0000              |                  |              |            |
| 2                          | 0.9     | 0.1     | 600                 | 540              | 60               | 43.0719                     | 18.4456                     | 42.6063                      | 60.42 | 4.15  | 0.068  | 42.5760     | 0.0009              |                  |              |            |
| 3                          | 0.8     | 0.2     | 600                 | 480              | 120              | 43.0860                     | 18.4462                     | 42.6198                      | 53.71 | 8.29  | 0.141  | 42.6113     | 0.0001              |                  |              |            |
| 4                          | 0.7     | 0.3     | 600                 | 420              | 180              | 43.1117                     | 18.4538                     | 42.6379                      | 47.00 | 12.44 | 0.219  | 42.6366     | 0.0000              | $\Delta$ alpha 0 | 0.01         | 0          |
| 5                          | 0.6     | 0.4     | 600                 | 360              | 240              | 43.1196                     | 18.4459                     | 42.6537                      | 40.28 | 16.58 | 0.304  | 42.6506     | 0.0000              | $\Delta$ alpha 1 | 0.02         | 2.2        |
| 6                          | 0.5     | 0.5     | 600                 | 300              | 300              | 43.1005                     | 19.4470                     | 42.6425                      | 33.57 | 20.73 | 0.395  | 42.6519     | 0.0001              | $\Delta$ alpha 2 | 0.01         | 0.6        |
| 7                          | 0.4     | 0.6     | 600                 | 240              | 360              | 43.0994                     | 18.4558                     | 42.6236                      | 26.85 | 24.87 | 0.495  | 42.6388     | 0.0002              |                  | <b>a2-a1</b> | <b>0.0</b> |
| 8                          | 0.3     | 0.7     | 600                 | 180              | 420              | 43.0702                     | 18.4537                     | 42.5905                      | 20.14 | 29.02 | 0.604  | 42.6093     | 0.0004              |                  |              |            |
| 9                          | 0.2     | 0.8     | 600                 | 120              | 480              | 43.0443                     | 18.4564                     | 42.5679                      | 13.43 | 33.16 | 0.723  | 42.5612     | 0.0000              |                  |              |            |
| 10                         | 0.1     | 0.9     | 600                 | 60               | 540              | 43.0067                     | 18.4537                     | 42.5330                      | 6.71  | 37.31 | 0.855  | 42.4916     | 0.0017              |                  |              |            |
| 11                         | 0       | 1       | 600                 | 0                | 600              | 42.9277                     | 18.4507                     | 42.3970                      | 0.00  | 41.45 | 1.000  | 42.3970     | 0.0000              |                  |              |            |
|                            |         |         | total vol of stock  | <b>3300</b>      | <b>3300</b>      |                             |                             |                              | -0.13 |       |        |             | <b>ss residuals</b> | <b>0.0034</b>    |              |            |
| 92 uncorrected             |         |         |                     |                  |                  |                             |                             |                              |       |       |        |             |                     |                  |              |            |
| $\rho$                     | 42.5316 | 42.3970 | 40.7375             |                  |                  |                             |                             |                              |       |       |        |             |                     |                  |              |            |
| conc / M                   | 67.136  | 41.451  |                     |                  |                  |                             |                             |                              |       |       |        |             |                     |                  |              |            |
| FW                         | 78.11   | 153.82  |                     |                  |                  |                             |                             |                              |       |       |        |             |                     |                  |              |            |
| density                    | 0.874   | 1.594   |                     |                  |                  |                             |                             |                              |       |       |        |             |                     |                  |              |            |
| N sites                    | 6       | 4       |                     |                  |                  |                             |                             |                              |       |       |        |             |                     |                  |              |            |
| <b>Phosphine Oxide</b>     |         |         |                     | C6H6             | CCl4             |                             |                             |                              |       |       |        |             |                     |                  |              |            |
| FW                         | 218.32  |         | weight / g          | 0.0102           | 0.0113           |                             |                             |                              |       |       |        |             |                     |                  |              |            |
| p                          | 97%     |         | weight solvent / g  | 4.3744           | 8.9384           |                             |                             |                              |       |       |        |             |                     |                  |              |            |
|                            |         |         | V solvent / mL      | 5.0050           | 5.5448           |                             |                             |                              |       |       |        |             |                     |                  |              |            |
|                            |         |         | conc / mM           | 3.0546           | 3.0546           |                             |                             |                              |       |       |        |             |                     |                  |              |            |
| <b>External Reference</b>  |         |         |                     |                  |                  |                             |                             |                              |       |       |        |             |                     |                  |              |            |
| Methylenediphosphonic acid |         |         |                     |                  |                  |                             |                             |                              |       |       |        |             |                     |                  |              |            |
| $\delta$ / ppm             | 17.98   |         |                     |                  |                  |                             |                             |                              |       |       |        |             |                     |                  |              |            |
| FW                         | 176.00  |         |                     |                  |                  |                             |                             |                              |       |       |        |             |                     |                  |              |            |
| weight / g                 | 0.0177  |         |                     |                  |                  |                             |                             |                              |       |       |        |             |                     |                  |              |            |
| V / mL                     | 2       |         |                     |                  |                  |                             |                             |                              |       |       |        |             |                     |                  |              |            |
| conc / mM                  | 50.28   |         |                     |                  |                  |                             |                             |                              |       |       |        |             |                     |                  |              |            |

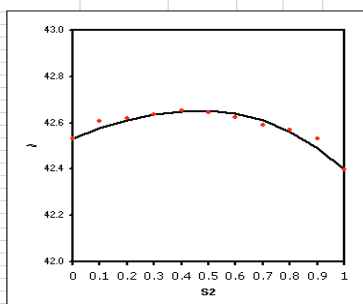

| Expt                       | C6H6    |         | vol total / $\mu$ l | CCl4             |                  | $\delta_{\text{exp}}$ / ppm | $\delta_{\text{ref}}$ / ppm | $\delta_{\text{calc}}$ / ppm | [S1]  | [S2]  | [A-S2] | $\rho$ calc | $\Delta\rho$ / ppm  | Kb 2 / M-1       | error        |            |
|----------------------------|---------|---------|---------------------|------------------|------------------|-----------------------------|-----------------------------|------------------------------|-------|-------|--------|-------------|---------------------|------------------|--------------|------------|
|                            | S1      | S2      |                     | vol S1 / $\mu$ l | vol S2 / $\mu$ l |                             |                             |                              |       |       |        |             | 1.9336              |                  |              | 1.19E+00   |
| 1                          | 1       | 0       | 600                 | 600              | 0                | 42.8377                     | 18.4467                     | 42.4310                      | 67.14 | 0.00  | 0.000  | 42.4310     | 0.0000              |                  |              |            |
| 2                          | 0.9     | 0.1     | 600                 | 540              | 60               | 42.9496                     | 18.4461                     | 42.4835                      | 60.42 | 4.15  | 0.075  | 42.4713     | 0.0001              |                  |              |            |
| 3                          | 0.8     | 0.2     | 600                 | 480              | 120              | 42.9779                     | 18.4463                     | 42.5116                      | 53.71 | 8.29  | 0.155  | 42.5029     | 0.0001              | $\Delta$ alpha 0 | 0.04         | 0          |
| 4                          | 0.7     | 0.3     | 600                 | 420              | 180              | 42.9931                     | 18.4511                     | 42.5220                      | 47.00 | 12.44 | 0.239  | 42.5251     | 0.0000              | $\Delta$ alpha 1 | 0.05         | 2.2        |
| 5                          | 0.6     | 0.4     | 600                 | 360              | 240              | 43.0000                     | 19.4445                     | 42.5355                      | 40.28 | 16.58 | 0.328  | 42.5371     | 0.0000              | $\Delta$ alpha 2 | 0.04         | 0.6        |
| 6                          | 0.5     | 0.5     | 600                 | 300              | 300              | 43.0002                     | 18.4436                     | 42.5368                      | 33.57 | 20.73 | 0.423  | 42.5378     | 0.0000              |                  |              |            |
| 7                          | 0.4     | 0.6     | 600                 | 240              | 360              | 42.9896                     | 18.4475                     | 42.5221                      | 26.85 | 24.87 | 0.524  | 42.5263     | 0.0000              |                  | <b>a2-a1</b> | <b>0.0</b> |
| 8                          | 0.3     | 0.7     | 600                 | 180              | 420              | 42.9660                     | 18.4568                     | 42.4992                      | 20.14 | 29.02 | 0.631  | 42.5013     | 0.0001              |                  |              |            |
| 9                          | 0.2     | 0.8     | 600                 | 120              | 480              | 42.9299                     | 18.4468                     | 42.4633                      | 13.43 | 33.16 | 0.746  | 42.4614     | 0.0000              |                  |              |            |
| 10                         | 0.1     | 0.9     | 600                 | 60               | 540              | 42.9255                     | 19.4424                     | 42.4291                      | 6.71  | 37.31 | 0.863  | 42.4051     | 0.0005              |                  |              |            |
| 11                         | 0       | 1       | 600                 | 0                | 600              | 42.8222                     | 18.4716                     | 42.3306                      | 0.00  | 41.45 | 1.000  | 42.3306     | 0.0000              |                  |              |            |
|                            |         |         | total vol of stock  | <b>3300</b>      | <b>3300</b>      |                             |                             |                              | -0.10 |       |        |             | <b>ss residuals</b> | <b>0.0010</b>    |              |            |
| 92 uncorrected             |         |         |                     |                  |                  |                             |                             |                              |       |       |        |             |                     |                  |              |            |
| $\rho$                     | 42.4310 | 42.3306 | 40.3970             |                  |                  |                             |                             |                              |       |       |        |             |                     |                  |              |            |
| conc / M                   | 67.136  | 41.451  |                     |                  |                  |                             |                             |                              |       |       |        |             |                     |                  |              |            |
| FW                         | 78.11   | 153.82  |                     |                  |                  |                             |                             |                              |       |       |        |             |                     |                  |              |            |
| density                    | 0.874   | 1.594   |                     |                  |                  |                             |                             |                              |       |       |        |             |                     |                  |              |            |
| N sites                    | 6       | 4       |                     |                  |                  |                             |                             |                              |       |       |        |             |                     |                  |              |            |
| <b>Phosphine Oxide</b>     |         |         |                     | C6H6             | CCl4             |                             |                             |                              |       |       |        |             |                     |                  |              |            |
| FW                         | 218.32  |         | weight / g          | 0.0115           | 0.0119           |                             |                             |                              |       |       |        |             |                     |                  |              |            |
| p                          | 97%     |         | weight solvent / g  | 4.3570           | 8.2227           |                             |                             |                              |       |       |        |             |                     |                  |              |            |
|                            |         |         | V solvent / mL      | 4.9051           | 5.1565           |                             |                             |                              |       |       |        |             |                     |                  |              |            |
|                            |         |         | conc / mM           | 10.2494          | 10.2494          |                             |                             |                              |       |       |        |             |                     |                  |              |            |
| <b>External Reference</b>  |         |         |                     |                  |                  |                             |                             |                              |       |       |        |             |                     |                  |              |            |
| Methylenediphosphonic acid |         |         |                     |                  |                  |                             |                             |                              |       |       |        |             |                     |                  |              |            |
| $\delta$ / ppm             | 17.98   |         |                     |                  |                  |                             |                             |                              |       |       |        |             |                     |                  |              |            |
| FW                         | 176.00  |         |                     |                  |                  |                             |                             |                              |       |       |        |             |                     |                  |              |            |
| weight / g                 | 0.0177  |         |                     |                  |                  |                             |                             |                              |       |       |        |             |                     |                  |              |            |
| V / mL                     | 2       |         |                     |                  |                  |                             |                             |                              |       |       |        |             |                     |                  |              |            |
| conc / mM                  | 50.28   |         |                     |                  |                  |                             |                             |                              |       |       |        |             |                     |                  |              |            |

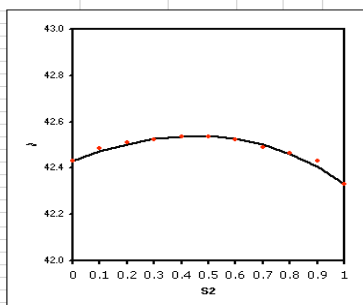

## 2.2. Benzene-Dichloromethane

| Expt                                                                                                                                                                                                                                                                                                                                                                                                                                                                                       | Benzene DCM |     | vol total / $\mu$ l | Benzene DCM      |                  | $\rho_{exp}$ / ppm | $\rho_{ref}$ / ppm | $\rho_{calc}$ / ppm | [S1]  | [S2]  | [A-S2]       | $\rho$ calc | error  | $\Delta G$ / kJ/mol | Kb 2 / M-1 | error |
|--------------------------------------------------------------------------------------------------------------------------------------------------------------------------------------------------------------------------------------------------------------------------------------------------------------------------------------------------------------------------------------------------------------------------------------------------------------------------------------------|-------------|-----|---------------------|------------------|------------------|--------------------|--------------------|---------------------|-------|-------|--------------|-------------|--------|---------------------|------------|-------|
|                                                                                                                                                                                                                                                                                                                                                                                                                                                                                            | S1          | S2  |                     | vol S1 / $\mu$ l | vol S2 / $\mu$ l |                    |                    |                     |       |       |              |             |        |                     |            |       |
| 1                                                                                                                                                                                                                                                                                                                                                                                                                                                                                          | 1           | 0   | 600                 | 600              | 0                | 44.0413            | 19.0382            | 42.9831             | 67.14 | 0.000 | 0.000        | 42.9831     | 0.0000 |                     |            |       |
| 2                                                                                                                                                                                                                                                                                                                                                                                                                                                                                          | 0.9         | 0.1 | 600                 | 540              | 60               | 45.0585            | 19.0392            | 43.9923             | 60.42 | 3.12  | 0.295        | 43.9908     | 0.0001 |                     |            |       |
| 3                                                                                                                                                                                                                                                                                                                                                                                                                                                                                          | 0.8         | 0.2 | 600                 | 480              | 120              | 45.7046            | 19.0383            | 44.6463             | 53.71 | 6.24  | 0.485        | 44.6511     | 0.0000 |                     |            |       |
| 4                                                                                                                                                                                                                                                                                                                                                                                                                                                                                          | 0.7         | 0.3 | 600                 | 420              | 180              | 46.1968            | 19.0399            | 45.1369             | 47.00 | 9.36  | 0.618        | 45.1427     | 0.0000 |                     |            |       |
| 5                                                                                                                                                                                                                                                                                                                                                                                                                                                                                          | 0.6         | 0.4 | 600                 | 360              | 240              | 46.5951            | 19.0479            | 45.5272             | 40.28 | 12.48 | 0.715        | 45.5259     | 0.0000 |                     |            |       |
| 6                                                                                                                                                                                                                                                                                                                                                                                                                                                                                          | 0.5         | 0.5 | 600                 | 300              | 300              | 46.8947            | 19.0392            | 45.8295             | 33.57 | 15.60 | 0.790        | 45.8386     | 0.0000 |                     |            |       |
| 7                                                                                                                                                                                                                                                                                                                                                                                                                                                                                          | 0.4         | 0.6 | 600                 | 240              | 360              | 47.1576            | 19.0402            | 46.0976             | 26.85 | 18.72 | 0.850        | 46.1028     | 0.0000 |                     |            |       |
| 8                                                                                                                                                                                                                                                                                                                                                                                                                                                                                          | 0.3         | 0.7 | 600                 | 180              | 420              | 47.3887            | 19.0408            | 46.3279             | 20.14 | 21.84 | 0.898        | 46.3321     | 0.0000 |                     |            |       |
| 9                                                                                                                                                                                                                                                                                                                                                                                                                                                                                          | 0.2         | 0.8 | 600                 | 120              | 480              | 47.6205            | 19.0478            | 46.5527             | 13.43 | 24.96 | 0.938        | 46.5357     | 0.0002 |                     |            |       |
| 10                                                                                                                                                                                                                                                                                                                                                                                                                                                                                         | 0.1         | 0.9 | 600                 | 60               | 540              | 47.8050            | 19.0479            | 46.7371             | 6.71  | 28.08 | 0.971        | 46.7196     | 0.0002 |                     |            |       |
| 11                                                                                                                                                                                                                                                                                                                                                                                                                                                                                         | 0           | 1   | 600                 | 0                | 600              | 47.9806            | 19.0725            | 46.8891             | 0.00  | 31.20 | 1.000        | 46.8991     | 0.0000 |                     |            |       |
|                                                                                                                                                                                                                                                                                                                                                                                                                                                                                            |             |     | total vol of stock  | 3300             | 3300             |                    |                    | 3.31                |       |       | ss residuals |             | 0.0008 |                     |            |       |
| <p><math>\rho</math> 42.9831 46.8881<br/> conc / M 67.136 31.202<br/> FW 78.11 84.93<br/> density 0.874 1.325<br/> N sites 6 2</p> <p>Phosphine Oxide<br/> weight / g Benzene 0.0101 DCM 0.0102<br/> FW 218.32 weight solvent / g 4.3818 6.7087<br/> p 97% V solvent / mL 5.0135 5.0631<br/> conc / mM 8.9507 8.9507</p> <p>External Reference<br/> Methylenediphosphonic acid<br/> M<sub>d</sub> / ppm 17.96<br/> FW 176.00<br/> weight / g 0.0177<br/> V / mL 2<br/> conc / mM 50.28</p> |             |     |                     |                  |                  |                    |                    |                     |       |       |              |             |        |                     |            |       |

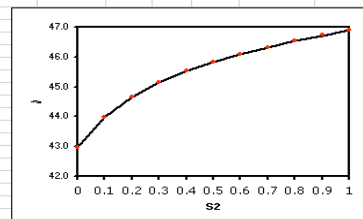

| Expt                                                                                                                                                                                                                                                                                                                                                                                                                                                                                       | Benzene DCM |     | vol total / $\mu$ l | Benzene DCM      |                  | $\rho_{exp}$ / ppm | $\rho_{ref}$ / ppm | $\rho_{calc}$ / ppm | [S1]  | [S2]  | [A-S2]       | $\rho$ calc | error  | $\Delta G$ / kJ/mol | Kb 2 / M-1 | error |
|--------------------------------------------------------------------------------------------------------------------------------------------------------------------------------------------------------------------------------------------------------------------------------------------------------------------------------------------------------------------------------------------------------------------------------------------------------------------------------------------|-------------|-----|---------------------|------------------|------------------|--------------------|--------------------|---------------------|-------|-------|--------------|-------------|--------|---------------------|------------|-------|
|                                                                                                                                                                                                                                                                                                                                                                                                                                                                                            | S1          | S2  |                     | vol S1 / $\mu$ l | vol S2 / $\mu$ l |                    |                    |                     |       |       |              |             |        |                     |            |       |
| 1                                                                                                                                                                                                                                                                                                                                                                                                                                                                                          | 1           | 0   | 600                 | 600              | 0                | 44.0111            | 19.0397            | 42.9514             | 67.14 | 0.000 | 0.000        | 42.9514     | 0.0000 |                     |            |       |
| 2                                                                                                                                                                                                                                                                                                                                                                                                                                                                                          | 0.9         | 0.1 | 600                 | 540              | 60               | 45.0576            | 19.0474            | 43.9902             | 60.42 | 3.12  | 0.315        | 43.9840     | 0.0007 |                     |            |       |
| 3                                                                                                                                                                                                                                                                                                                                                                                                                                                                                          | 0.8         | 0.2 | 600                 | 480              | 120              | 45.6970            | 19.0568            | 44.6202             | 53.71 | 6.24  | 0.509        | 44.6280     | 0.0001 |                     |            |       |
| 4                                                                                                                                                                                                                                                                                                                                                                                                                                                                                          | 0.7         | 0.3 | 600                 | 420              | 180              | 46.1669            | 19.0601            | 45.0888             | 47.00 | 9.36  | 0.640        | 45.1133     | 0.0007 |                     |            |       |
| 5                                                                                                                                                                                                                                                                                                                                                                                                                                                                                          | 0.6         | 0.4 | 600                 | 360              | 240              | 46.5841            | 19.0432            | 45.5009             | 40.28 | 12.48 | 0.734        | 45.4939     | 0.0000 |                     |            |       |
| 6                                                                                                                                                                                                                                                                                                                                                                                                                                                                                          | 0.5         | 0.5 | 600                 | 300              | 300              | 46.9707            | 19.0526            | 45.7981             | 33.57 | 15.60 | 0.805        | 45.8063     | 0.0001 |                     |            |       |
| 7                                                                                                                                                                                                                                                                                                                                                                                                                                                                                          | 0.4         | 0.6 | 600                 | 240              | 360              | 47.1513            | 19.0434            | 46.0879             | 26.85 | 18.72 | 0.861        | 46.0781     | 0.0001 |                     |            |       |
| 8                                                                                                                                                                                                                                                                                                                                                                                                                                                                                          | 0.3         | 0.7 | 600                 | 180              | 420              | 47.3974            | 19.0564            | 46.3210             | 20.14 | 21.84 | 0.906        | 46.3165     | 0.0000 |                     |            |       |
| 9                                                                                                                                                                                                                                                                                                                                                                                                                                                                                          | 0.2         | 0.8 | 600                 | 120              | 480              | 47.6161            | 19.0486            | 46.5475             | 13.43 | 24.96 | 0.943        | 46.5318     | 0.0002 |                     |            |       |
| 10                                                                                                                                                                                                                                                                                                                                                                                                                                                                                         | 0.1         | 0.9 | 600                 | 60               | 540              | 47.8007            | 19.0389            | 46.7416             | 6.71  | 28.08 | 0.974        | 46.7299     | 0.0001 |                     |            |       |
| 11                                                                                                                                                                                                                                                                                                                                                                                                                                                                                         | 0           | 1   | 600                 | 0                | 600              | 47.9894            | 19.0469            | 46.8145             | 0.00  | 31.20 | 1.000        | 46.8145     | 0.0000 |                     |            |       |
|                                                                                                                                                                                                                                                                                                                                                                                                                                                                                            |             |     | total vol of stock  | 3300             | 3300             |                    |                    | 3.36                |       |       | ss residuals |             | 0.0021 |                     |            |       |
| <p><math>\rho</math> 42.9514 46.8145<br/> conc / M 67.136 31.202<br/> FW 78.11 84.93<br/> density 0.874 1.325<br/> N sites 6 2</p> <p>Phosphine Oxide<br/> weight / g Benzene 0.0102 DCM 0.0098<br/> FW 218.32 weight solvent / g 4.3736 6.4354<br/> p 97% V solvent / mL 5.0041 4.8569<br/> conc / mM 9.0563 9.0563</p> <p>External Reference<br/> Methylenediphosphonic acid<br/> M<sub>d</sub> / ppm 17.96<br/> FW 176.00<br/> weight / g 0.0177<br/> V / mL 2<br/> conc / mM 50.28</p> |             |     |                     |                  |                  |                    |                    |                     |       |       |              |             |        |                     |            |       |

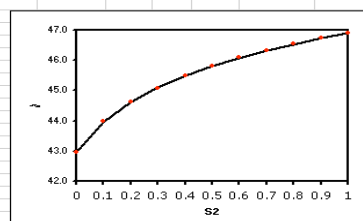

### 2.3. Chloroform-1,4-Dioxane

| Expt                       | CHCl <sub>3</sub> 1,4-Dioxane |                    | CHCl <sub>3</sub> 1,4-Dioxane |                  | $\rho_{\text{exp}}$ / ppm | $\rho_{\text{ref}}$ / ppm | $\rho_{\text{calc}}$ / ppm | [S1]    | [S2]  | [A-S2] | $\rho$ calc | $\rho$ error | $\Delta G$ / kJ/mol | Kb 2 / M-1 | error |                  |
|----------------------------|-------------------------------|--------------------|-------------------------------|------------------|---------------------------|---------------------------|----------------------------|---------|-------|--------|-------------|--------------|---------------------|------------|-------|------------------|
|                            | S1                            | S2                 | vol total / $\mu$ l           | vol S1 / $\mu$ l |                           |                           |                            |         |       |        |             |              |                     |            |       | vol S2 / $\mu$ l |
| 1                          | 1                             | 0                  | 600                           | 600              | 0                         | 48.9864                   | 18.4467                    | 48.5197 | 12.50 | 0.00   | 0.000       | 48.5197      | 0.0000              |            |       |                  |
| 2                          | 0.9                           | 0.1                | 600                           | 540              | 60                        | 48.9635                   | 18.4443                    | 48.2987 | 11.25 | 9.39   | 0.017       | 48.3479      | 0.0028              |            |       |                  |
| 3                          | 0.8                           | 0.2                | 600                           | 480              | 120                       | 48.7003                   | 18.4433                    | 48.2370 | 10.00 | 18.78  | 0.037       | 48.1624      | 0.0056              |            |       |                  |
| 4                          | 0.7                           | 0.3                | 600                           | 420              | 180                       | 48.4896                   | 18.4497                    | 48.0199 | 8.75  | 28.16  | 0.061       | 47.9586      | 0.0038              |            |       |                  |
| 5                          | 0.6                           | 0.4                | 600                           | 360              | 240                       | 48.2293                   | 18.4450                    | 47.7639 | 7.50  | 37.55  | 0.092       | 47.7295      | 0.0012              |            |       |                  |
| 6                          | 0.5                           | 0.5                | 600                           | 300              | 300                       | 47.9228                   | 18.4464                    | 47.4574 | 6.25  | 46.94  | 0.132       | 47.4639      | 0.0000              |            |       |                  |
| 7                          | 0.4                           | 0.6                | 600                           | 240              | 360                       | 47.5676                   | 18.4542                    | 47.0934 | 5.00  | 56.33  | 0.166       | 47.1128      | 0.0024              |            |       |                  |
| 8                          | 0.3                           | 0.7                | 600                           | 180              | 420                       | 47.1397                   | 18.4569                    | 46.6628 | 3.75  | 65.72  | 0.262       | 46.7315      | 0.0047              |            |       |                  |
| 9                          | 0.2                           | 0.8                | 600                           | 120              | 480                       | 46.5895                   | 18.4464                    | 46.1221 | 2.50  | 75.11  | 0.378       | 46.1587      | 0.0013              |            |       |                  |
| 10                         | 0.1                           | 0.9                | 600                           | 60               | 540                       | 45.8012                   | 18.4475                    | 45.3337 | 1.25  | 84.49  | 0.577       | 45.2507      | 0.0063              |            |       |                  |
| 11                         | 0                             | 1                  | 600                           | 0                | 600                       | 43.9391                   | 18.4732                    | 43.4459 | 0.00  | 93.88  | 1.000       | 43.4459      | 0.0000              |            |       |                  |
| total vol of stock         |                               |                    | 3300                          | 3300             |                           |                           |                            | -5.07   |       |        |             | ss residuals | 0.0285              |            |       |                  |
| 22 uncorrected             |                               |                    |                               |                  |                           |                           |                            |         |       |        |             |              |                     |            |       |                  |
| $\rho$                     | 48.5197                       | 43.4459            | 44.4969                       |                  |                           |                           |                            |         |       |        |             |              |                     |            |       |                  |
| conc / M                   | 12.498                        | 93.893             |                               |                  |                           |                           |                            |         |       |        |             |              |                     |            |       |                  |
| FW                         | 119.38                        | 88.11              |                               |                  |                           |                           |                            |         |       |        |             |              |                     |            |       |                  |
| density                    | 1.492                         | 1.034              |                               |                  |                           |                           |                            |         |       |        |             |              |                     |            |       |                  |
| N sites                    | 1                             | 8                  |                               |                  |                           |                           |                            |         |       |        |             |              |                     |            |       |                  |
| <b>Phosphine Oxide</b>     |                               |                    | CHCl <sub>3</sub>             | 1,4-Dioxane      |                           |                           |                            |         |       |        |             |              |                     |            |       |                  |
| FW                         | 218.32                        | weight / g         | 0.0098                        | 0.0197           |                           |                           |                            |         |       |        |             |              |                     |            |       |                  |
| p                          | 97%                           | weight solvent / g | 7.3490                        | 8.1593           | 5.0416                    |                           |                            |         |       |        |             |              |                     |            |       |                  |
|                            |                               | V solvent / mL     | 4.9256                        | 7.8910           |                           |                           |                            |         |       |        |             |              |                     |            |       |                  |
|                            |                               | conc / mM          | 8.8398                        | 8.8398           |                           |                           |                            |         |       |        |             |              |                     |            |       |                  |
| <b>External Reference</b>  |                               |                    |                               |                  |                           |                           |                            |         |       |        |             |              |                     |            |       |                  |
| Methylenediphosphonic acid |                               |                    |                               |                  |                           |                           |                            |         |       |        |             |              |                     |            |       |                  |
| M <sub>d</sub> / ppm       | 17.36                         |                    |                               |                  |                           |                           |                            |         |       |        |             |              |                     |            |       |                  |
| FW                         | 176.00                        |                    |                               |                  |                           |                           |                            |         |       |        |             |              |                     |            |       |                  |
| weight / g                 | 0.0177                        |                    |                               |                  |                           |                           |                            |         |       |        |             |              |                     |            |       |                  |
| V / mL                     | 2                             |                    |                               |                  |                           |                           |                            |         |       |        |             |              |                     |            |       |                  |
| conc / mM                  | 50.28                         |                    |                               |                  |                           |                           |                            |         |       |        |             |              |                     |            |       |                  |

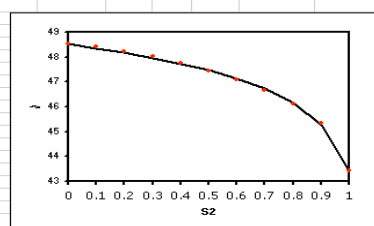

| Expt                       | CHCl <sub>3</sub> 1,4-Dioxane |                    | CHCl <sub>3</sub> 1,4-Dioxane |                  | $\rho_{\text{exp}}$ / ppm | $\rho_{\text{ref}}$ / ppm | $\rho_{\text{calc}}$ / ppm | [S1]    | [S2]  | [A-S2] | $\rho$ calc | $\rho$ error | $\Delta G$ / kJ/mol | Kb 2 / M-1 | error |                  |
|----------------------------|-------------------------------|--------------------|-------------------------------|------------------|---------------------------|---------------------------|----------------------------|---------|-------|--------|-------------|--------------|---------------------|------------|-------|------------------|
|                            | S1                            | S2                 | vol total / $\mu$ l           | vol S1 / $\mu$ l |                           |                           |                            |         |       |        |             |              |                     |            |       | vol S2 / $\mu$ l |
| 1                          | 1                             | 0                  | 600                           | 600              | 0                         | 48.9832                   | 18.4463                    | 48.5169 | 12.50 | 0.00   | 0.000       | 48.5169      | 0.0000              |            |       |                  |
| 2                          | 0.9                           | 0.1                | 600                           | 540              | 60                        | 48.8548                   | 18.4482                    | 48.3868 | 11.25 | 9.39   | 0.016       | 48.3413      | 0.0021              |            |       |                  |
| 3                          | 0.8                           | 0.2                | 600                           | 480              | 120                       | 48.6928                   | 18.4481                    | 48.2247 | 10.00 | 18.78  | 0.036       | 48.1521      | 0.0053              |            |       |                  |
| 4                          | 0.7                           | 0.3                | 600                           | 420              | 180                       | 48.4797                   | 18.4535                    | 48.0062 | 8.75  | 28.16  | 0.060       | 47.9446      | 0.0038              |            |       |                  |
| 5                          | 0.6                           | 0.4                | 600                           | 360              | 240                       | 48.2060                   | 18.4485                    | 47.7375 | 7.50  | 37.55  | 0.091       | 47.7117      | 0.0007              |            |       |                  |
| 6                          | 0.5                           | 0.5                | 600                           | 300              | 300                       | 47.9056                   | 18.4469                    | 47.4367 | 6.25  | 46.94  | 0.131       | 47.4423      | 0.0000              |            |       |                  |
| 7                          | 0.4                           | 0.6                | 600                           | 240              | 360                       | 47.5503                   | 18.4560                    | 47.0743 | 5.00  | 56.33  | 0.184       | 47.1174      | 0.0019              |            |       |                  |
| 8                          | 0.3                           | 0.7                | 600                           | 180              | 420                       | 47.1193                   | 18.4629                    | 46.6364 | 3.75  | 65.72  | 0.259       | 46.7018      | 0.0043              |            |       |                  |
| 9                          | 0.2                           | 0.8                | 600                           | 120              | 480                       | 46.5629                   | 18.4540                    | 46.0888 | 2.50  | 75.11  | 0.375       | 46.1236      | 0.0012              |            |       |                  |
| 10                         | 0.1                           | 0.9                | 600                           | 60               | 540                       | 45.7536                   | 18.4497                    | 45.2839 | 1.25  | 84.49  | 0.575       | 45.2064      | 0.0060              |            |       |                  |
| 11                         | 0                             | 1                  | 600                           | 0                | 600                       | 43.8869                   | 18.4729                    | 43.3746 | 0.00  | 93.88  | 1.000       | 43.3746      | 0.0000              |            |       |                  |
| total vol of stock         |                               |                    | 3300                          | 3300             |                           |                           |                            | -5.14   |       |        |             | ss residuals | 0.0282              |            |       |                  |
| 22 uncorrected             |                               |                    |                               |                  |                           |                           |                            |         |       |        |             |              |                     |            |       |                  |
| $\rho$                     | 48.5169                       | 43.3746            | 44.4659                       |                  |                           |                           |                            |         |       |        |             |              |                     |            |       |                  |
| conc / M                   | 12.498                        | 93.893             |                               |                  |                           |                           |                            |         |       |        |             |              |                     |            |       |                  |
| FW                         | 119.38                        | 88.11              |                               |                  |                           |                           |                            |         |       |        |             |              |                     |            |       |                  |
| density                    | 1.492                         | 1.034              |                               |                  |                           |                           |                            |         |       |        |             |              |                     |            |       |                  |
| N sites                    | 1                             | 8                  |                               |                  |                           |                           |                            |         |       |        |             |              |                     |            |       |                  |
| <b>Phosphine Oxide</b>     |                               |                    | CHCl <sub>3</sub>             | 1,4-Dioxane      |                           |                           |                            |         |       |        |             |              |                     |            |       |                  |
| FW                         | 218.32                        | weight / g         | 0.0100                        | 0.0128           |                           |                           |                            |         |       |        |             |              |                     |            |       |                  |
| p                          | 97%                           | weight solvent / g | 7.3776                        | 6.5995           | 4.9403                    |                           |                            |         |       |        |             |              |                     |            |       |                  |
|                            |                               | V solvent / mL     | 4.9447                        | 6.3787           |                           |                           |                            |         |       |        |             |              |                     |            |       |                  |
|                            |                               | conc / mM          | 8.9854                        | 8.9854           |                           |                           |                            |         |       |        |             |              |                     |            |       |                  |
| <b>External Reference</b>  |                               |                    |                               |                  |                           |                           |                            |         |       |        |             |              |                     |            |       |                  |
| Methylenediphosphonic acid |                               |                    |                               |                  |                           |                           |                            |         |       |        |             |              |                     |            |       |                  |
| M <sub>d</sub> / ppm       | 17.36                         |                    |                               |                  |                           |                           |                            |         |       |        |             |              |                     |            |       |                  |
| FW                         | 176.00                        |                    |                               |                  |                           |                           |                            |         |       |        |             |              |                     |            |       |                  |
| weight / g                 | 0.0177                        |                    |                               |                  |                           |                           |                            |         |       |        |             |              |                     |            |       |                  |
| V / mL                     | 2                             |                    |                               |                  |                           |                           |                            |         |       |        |             |              |                     |            |       |                  |
| conc / mM                  | 50.28                         |                    |                               |                  |                           |                           |                            |         |       |        |             |              |                     |            |       |                  |

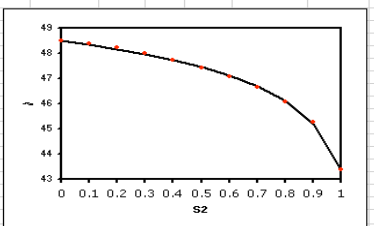

## 2.4. Chloroform-Acetone

| Expt                       | CHCl <sub>3</sub> Acetone |         | CHCl <sub>3</sub> Acetone |                   | δ <sub>exp</sub> / ppm | δ <sub>exp</sub> ref / ppm | δ <sub>exp</sub> / ppm | [S1]    | [S2]  | [A-S2] | δ calc | error        | ΔG / kJ/mol | Kb 2 / M-1 | error |             |
|----------------------------|---------------------------|---------|---------------------------|-------------------|------------------------|----------------------------|------------------------|---------|-------|--------|--------|--------------|-------------|------------|-------|-------------|
|                            | S1                        | S2      | vol total / μl            | vol S1 / μl       |                        |                            |                        |         |       |        |        |              |             |            |       | vol S2 / μl |
| 1                          | 1                         | 0       | 600                       | 600               | 0                      | 49.0029                    | 18.4444                | 48.5395 | 12.50 | 0.000  | 0.000  | 48.5395      | 0.0000      |            |       |             |
| 2                          | 0.9                       | 0.1     | 600                       | 540               | 60                     | 49.0544                    | 18.3372                | 48.5472 | 11.25 | 8.17   | 0.023  | 48.5639      | 0.0063      |            |       |             |
| 3                          | 0.8                       | 0.2     | 600                       | 480               | 120                    | 49.1352                    | 18.4469                | 48.6683 | 10.00 | 16.34  | 0.051  | 48.5676      | 0.0101      |            |       |             |
| 4                          | 0.7                       | 0.3     | 600                       | 420               | 180                    | 49.0876                    | 18.4534                | 48.6142 | 8.75  | 24.51  | 0.084  | 48.5430      | 0.0051      |            |       |             |
| 5                          | 0.6                       | 0.4     | 600                       | 360               | 240                    | 48.9794                    | 18.4470                | 48.5114 | 7.50  | 32.69  | 0.125  | 48.4804      | 0.0010      |            |       |             |
| 6                          | 0.5                       | 0.5     | 600                       | 300               | 300                    | 48.8042                    | 18.4469                | 48.3384 | 6.25  | 40.86  | 0.176  | 48.3649      | 0.0007      |            |       |             |
| 7                          | 0.4                       | 0.6     | 600                       | 240               | 360                    | 48.5730                    | 18.4555                | 48.1025 | 5.00  | 49.03  | 0.243  | 48.1730      | 0.0050      |            |       |             |
| 8                          | 0.3                       | 0.7     | 600                       | 180               | 420                    | 48.2622                    | 18.4622                | 47.7800 | 3.75  | 57.20  | 0.333  | 47.8644      | 0.0071      |            |       |             |
| 9                          | 0.2                       | 0.8     | 600                       | 120               | 480                    | 47.8053                    | 18.4483                | 47.3370 | 2.50  | 65.37  | 0.461  | 47.3652      | 0.0008      |            |       |             |
| 10                         | 0.1                       | 0.9     | 600                       | 60                | 540                    | 47.3096                    | 18.4484                | 46.6412 | 1.25  | 73.54  | 0.658  | 46.5214      | 0.0144      |            |       |             |
| 11                         | 0                         | 1       | 600                       | 0                 | 600                    | 45.4452                    | 18.4727                | 44.9525 | 0.00  | 81.71  | 1.000  | 44.9525      | 0.0000      |            |       |             |
|                            |                           |         | total vol of stock        | 3300              | 3300                   |                            |                        |         |       |        |        | ss residuals | 0.0511      |            |       |             |
|                            |                           |         | 92 uncorrected            |                   |                        |                            |                        |         |       |        |        |              |             |            |       |             |
| ρ                          | 48.5385                   | 44.9525 | 43.5393                   |                   |                        |                            |                        |         |       |        |        |              |             |            |       |             |
| conc / M                   | 12.439                    | 81.716  |                           |                   |                        |                            |                        |         |       |        |        |              |             |            |       |             |
| FW                         | 119.38                    | 58.08   |                           |                   |                        |                            |                        |         |       |        |        |              |             |            |       |             |
| density                    | 1.492                     | 0.791   |                           |                   |                        |                            |                        |         |       |        |        |              |             |            |       |             |
| N sites                    | 1                         | 6       |                           |                   |                        |                            |                        |         |       |        |        |              |             |            |       |             |
| <b>Phosphine Oxide</b>     |                           |         |                           | CHCl <sub>3</sub> | Acetone                |                            |                        |         |       |        |        |              |             |            |       |             |
| FW                         | 218.32                    |         | weight / g                | 0.0111            | 0.0119                 |                            |                        |         |       |        |        |              |             |            |       |             |
| p                          | 97%                       |         | weight solvent / g        | 7.4123            | 4.2129                 | 5.0416                     |                        |         |       |        |        |              |             |            |       |             |
|                            |                           |         | V solvent / mL            | 4.9680            | 5.3261                 |                            |                        |         |       |        |        |              |             |            |       |             |
|                            |                           |         | conc / mM                 | 9.9270            | 9.9270                 |                            |                        |         |       |        |        |              |             |            |       |             |
| <b>External Reference</b>  |                           |         |                           |                   |                        |                            |                        |         |       |        |        |              |             |            |       |             |
| Methylenediphosphonic acid |                           |         |                           |                   |                        |                            |                        |         |       |        |        |              |             |            |       |             |
| M <sub>d</sub> / ppm       | 17.36                     |         |                           |                   |                        |                            |                        |         |       |        |        |              |             |            |       |             |
| FW                         | 176.00                    |         |                           |                   |                        |                            |                        |         |       |        |        |              |             |            |       |             |
| weight / g                 | 0.0177                    |         |                           |                   |                        |                            |                        |         |       |        |        |              |             |            |       |             |
| V / mL                     | 2                         |         |                           |                   |                        |                            |                        |         |       |        |        |              |             |            |       |             |
| conc / mM                  | 50.28                     |         |                           |                   |                        |                            |                        |         |       |        |        |              |             |            |       |             |

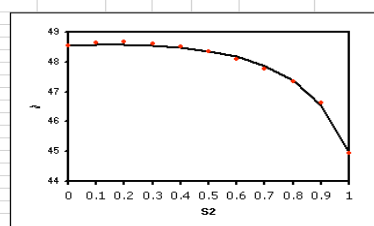

| Expt                       | CHCl <sub>3</sub> Acetone |         | CHCl <sub>3</sub> Acetone |                   | δ <sub>exp</sub> / ppm | δ <sub>exp</sub> ref / ppm | δ <sub>exp</sub> / ppm | [S1]    | [S2]  | [A-S2] | δ calc | error        | ΔG / kJ/mol | Kb 2 / M-1 | error |             |
|----------------------------|---------------------------|---------|---------------------------|-------------------|------------------------|----------------------------|------------------------|---------|-------|--------|--------|--------------|-------------|------------|-------|-------------|
|                            | S1                        | S2      | vol total / μl            | vol S1 / μl       |                        |                            |                        |         |       |        |        |              |             |            |       | vol S2 / μl |
| 1                          | 1                         | 0       | 600                       | 600               | 0                      | 49.0411                    | 18.4433                | 48.5778 | 12.50 | 0.000  | 0.000  | 48.5778      | 0.0000      |            |       |             |
| 2                          | 0.9                       | 0.1     | 600                       | 540               | 60                     | 49.1207                    | 18.4438                | 48.6563 | 11.25 | 8.17   | 0.027  | 48.6049      | 0.0027      |            |       |             |
| 3                          | 0.8                       | 0.2     | 600                       | 480               | 120                    | 49.1435                    | 18.4441                | 48.6794 | 10.00 | 16.34  | 0.058  | 48.6068      | 0.0053      |            |       |             |
| 4                          | 0.7                       | 0.3     | 600                       | 420               | 180                    | 49.0830                    | 18.4496                | 48.6134 | 8.75  | 24.51  | 0.096  | 48.5762      | 0.0014      |            |       |             |
| 5                          | 0.6                       | 0.4     | 600                       | 360               | 240                    | 48.9714                    | 18.4446                | 48.5068 | 7.50  | 32.69  | 0.141  | 48.5024      | 0.0000      |            |       |             |
| 6                          | 0.5                       | 0.5     | 600                       | 300               | 300                    | 48.8023                    | 18.4432                | 48.3291 | 6.25  | 40.86  | 0.196  | 48.3639      | 0.0009      |            |       |             |
| 7                          | 0.4                       | 0.6     | 600                       | 240               | 360                    | 48.5725                    | 18.4538                | 48.0987 | 5.00  | 49.03  | 0.270  | 48.1544      | 0.0031      |            |       |             |
| 8                          | 0.3                       | 0.7     | 600                       | 180               | 420                    | 48.2532                    | 18.4579                | 47.7753 | 3.75  | 57.20  | 0.365  | 47.8162      | 0.0017      |            |       |             |
| 9                          | 0.2                       | 0.8     | 600                       | 120               | 480                    | 47.7947                    | 18.4469                | 47.3288 | 2.50  | 65.37  | 0.496  | 47.2854      | 0.0019      |            |       |             |
| 10                         | 0.1                       | 0.9     | 600                       | 60                | 540                    | 46.3193                    | 18.4472                | 46.4521 | 1.25  | 73.54  | 0.689  | 46.4269      | 0.0006      |            |       |             |
| 11                         | 0                         | 1       | 600                       | 0                 | 600                    | 45.4254                    | 18.4686                | 44.9398 | 0.00  | 81.71  | 1.000  | 44.9398      | 0.0000      |            |       |             |
|                            |                           |         | total vol of stock        | 3300              | 3300                   |                            |                        |         |       |        |        | ss residuals | 0.0178      |            |       |             |
|                            |                           |         | 92 uncorrected            |                   |                        |                            |                        |         |       |        |        |              |             |            |       |             |
| ρ                          | 48.5778                   | 44.9398 | 43.2492                   |                   |                        |                            |                        |         |       |        |        |              |             |            |       |             |
| conc / M                   | 12.438                    | 81.716  |                           |                   |                        |                            |                        |         |       |        |        |              |             |            |       |             |
| FW                         | 119.38                    | 58.08   |                           |                   |                        |                            |                        |         |       |        |        |              |             |            |       |             |
| density                    | 1.492                     | 0.791   |                           |                   |                        |                            |                        |         |       |        |        |              |             |            |       |             |
| N sites                    | 1                         | 6       |                           |                   |                        |                            |                        |         |       |        |        |              |             |            |       |             |
| <b>Phosphine Oxide</b>     |                           |         |                           | CHCl <sub>3</sub> | Acetone                |                            |                        |         |       |        |        |              |             |            |       |             |
| FW                         | 218.32                    |         | weight / g                | 0.0106            | 0.0108                 |                            |                        |         |       |        |        |              |             |            |       |             |
| p                          | 97%                       |         | weight solvent / g        | 7.3970            | 3.9956                 | 4.9403                     |                        |         |       |        |        |              |             |            |       |             |
|                            |                           |         | V solvent / mL            | 4.9578            | 5.0513                 |                            |                        |         |       |        |        |              |             |            |       |             |
|                            |                           |         | conc / mM                 | 9.4994            | 9.4994                 |                            |                        |         |       |        |        |              |             |            |       |             |
| <b>External Reference</b>  |                           |         |                           |                   |                        |                            |                        |         |       |        |        |              |             |            |       |             |
| Methylenediphosphonic acid |                           |         |                           |                   |                        |                            |                        |         |       |        |        |              |             |            |       |             |
| M <sub>d</sub> / ppm       | 17.36                     |         |                           |                   |                        |                            |                        |         |       |        |        |              |             |            |       |             |
| FW                         | 176.00                    |         |                           |                   |                        |                            |                        |         |       |        |        |              |             |            |       |             |
| weight / g                 | 0.0177                    |         |                           |                   |                        |                            |                        |         |       |        |        |              |             |            |       |             |
| V / mL                     | 2                         |         |                           |                   |                        |                            |                        |         |       |        |        |              |             |            |       |             |
| conc / mM                  | 50.28                     |         |                           |                   |                        |                            |                        |         |       |        |        |              |             |            |       |             |

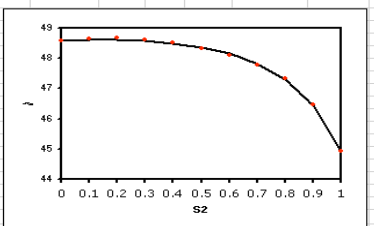



## 2.5. Chloroform-Benzene

| Expt | CHCl <sub>3</sub> C <sub>6</sub> H <sub>6</sub> |     | CHCl <sub>3</sub> C <sub>6</sub> H <sub>6</sub> |                  | $\rho_{exp}$ / ppm | $\rho_{ref}$ / ppm | $\rho_{calc}$ / ppm | [S1]    | [S2]  | [A-S2] | $\rho$ calc | error        | $\Delta G$ / kJ/mol | Kb 2 / M-1       | error |                                   |
|------|-------------------------------------------------|-----|-------------------------------------------------|------------------|--------------------|--------------------|---------------------|---------|-------|--------|-------------|--------------|---------------------|------------------|-------|-----------------------------------|
|      | S1                                              | S2  | vol total / $\mu$ l                             | vol S1 / $\mu$ l |                    |                    |                     |         |       |        |             |              |                     |                  |       | vol S2 / $\mu$ l                  |
| 1    | 1                                               | 0   | 600                                             | 600              | 0                  | 48.0787            | 18.4496             | 48.6091 | 12.50 | 0.00   | 0.000       | 48.6091      | 0.0000              |                  |       |                                   |
| 2    | 0.9                                             | 0.1 | 600                                             | 540              | 60                 | 48.3939            | 18.4479             | 48.4520 | 11.25 | 6.71   | 0.011       | 48.4639      | 0.0012              |                  |       |                                   |
| 3    | 0.8                                             | 0.2 | 600                                             | 480              | 120                | 48.7336            | 18.4488             | 48.2648 | 10.00 | 13.43  | 0.023       | 48.2137      | 0.0026              | $\Delta$ alpha 0 | -0.96 | 0                                 |
| 4    | 0.7                                             | 0.3 | 600                                             | 420              | 180                | 48.9196            | 18.4520             | 48.0476 | 8.75  | 20.14  | 0.039       | 47.9953      | 0.0027              | $\Delta$ alpha 1 | -1.05 | 0.8 CHCl <sub>3</sub>             |
| 5    | 0.6                                             | 0.4 | 600                                             | 360              | 240                | 48.2626            | 18.4455             | 47.7971 | 7.50  | 26.85  | 0.060       | 47.7554      | 0.0017              | $\Delta$ alpha 2 | -1.23 | 2.2 C <sub>6</sub> H <sub>6</sub> |
| 6    | 0.5                                             | 0.5 | 600                                             | 300              | 300                | 47.8359            | 18.4484             | 47.4675 | 6.25  | 33.57  | 0.087       | 47.4832      | 0.0002              |                  |       |                                   |
| 7    | 0.4                                             | 0.6 | 600                                             | 240              | 360                | 47.6278            | 18.4565             | 47.1933 | 5.00  | 40.28  | 0.125       | 47.1937      | 0.0001              |                  |       |                                   |
| 8    | 0.3                                             | 0.7 | 600                                             | 180              | 420                | 47.1758            | 18.4674             | 46.6884 | 3.75  | 47.00  | 0.182       | 46.7468      | 0.0034              |                  |       |                                   |
| 9    | 0.2                                             | 0.8 | 600                                             | 120              | 480                | 46.5849            | 18.4557             | 46.1032 | 2.50  | 53.71  | 0.277       | 46.1569      | 0.0023              |                  |       |                                   |
| 10   | 0.1                                             | 0.9 | 600                                             | 60               | 540                | 45.6620            | 18.4514             | 45.1906 | 1.25  | 60.42  | 0.463       | 45.1320      | 0.0034              |                  |       |                                   |
| 11   | 0                                               | 1   | 600                                             | 0                | 600                | 42.9344            | 18.4760             | 42.4384 | 0.00  | 67.14  | 1.000       | 42.4384      | 0.0000              |                  |       |                                   |
|      |                                                 |     | total vol of stock                              | 3300             | 3300               |                    |                     |         |       |        |             | ss residuals | 0.0178              |                  |       |                                   |
|      |                                                 |     | $\rho$ uncorrected                              |                  |                    |                    |                     |         |       |        |             |              |                     |                  |       |                                   |
|      |                                                 |     | $\rho$                                          |                  |                    |                    |                     |         |       |        |             |              |                     |                  |       |                                   |
|      |                                                 |     | conc / M                                        |                  |                    |                    |                     |         |       |        |             |              |                     |                  |       |                                   |
|      |                                                 |     | FW                                              |                  |                    |                    |                     |         |       |        |             |              |                     |                  |       |                                   |
|      |                                                 |     | density                                         |                  |                    |                    |                     |         |       |        |             |              |                     |                  |       |                                   |
|      |                                                 |     | N sites                                         |                  |                    |                    |                     |         |       |        |             |              |                     |                  |       |                                   |
|      |                                                 |     | Phosphine Oxide                                 |                  |                    |                    |                     |         |       |        |             |              |                     |                  |       |                                   |
|      |                                                 |     | weight / g                                      |                  |                    |                    |                     |         |       |        |             |              |                     |                  |       |                                   |
|      |                                                 |     | weight solvent / g                              |                  |                    |                    |                     |         |       |        |             |              |                     |                  |       |                                   |
|      |                                                 |     | V solvent / mL                                  |                  |                    |                    |                     |         |       |        |             |              |                     |                  |       |                                   |
|      |                                                 |     | conc / mM                                       |                  |                    |                    |                     |         |       |        |             |              |                     |                  |       |                                   |
|      |                                                 |     | External Reference                              |                  |                    |                    |                     |         |       |        |             |              |                     |                  |       |                                   |
|      |                                                 |     | Methylenediphosphonic acid                      |                  |                    |                    |                     |         |       |        |             |              |                     |                  |       |                                   |
|      |                                                 |     | M <sub>d</sub> / ppm                            |                  |                    |                    |                     |         |       |        |             |              |                     |                  |       |                                   |
|      |                                                 |     | FW                                              |                  |                    |                    |                     |         |       |        |             |              |                     |                  |       |                                   |
|      |                                                 |     | weight / g                                      |                  |                    |                    |                     |         |       |        |             |              |                     |                  |       |                                   |
|      |                                                 |     | V / mL                                          |                  |                    |                    |                     |         |       |        |             |              |                     |                  |       |                                   |
|      |                                                 |     | conc / mM                                       |                  |                    |                    |                     |         |       |        |             |              |                     |                  |       |                                   |

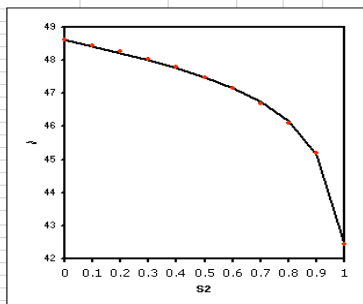

| Expt | CHCl <sub>3</sub> C <sub>6</sub> H <sub>6</sub> |     | CHCl <sub>3</sub> C <sub>6</sub> H <sub>6</sub> |                  | $\rho_{exp}$ / ppm | $\rho_{ref}$ / ppm | $\rho_{calc}$ / ppm | [S1]    | [S2]  | [A-S2] | $\rho$ calc | error        | $\Delta G$ / kJ/mol | Kb 2 / M-1       | error |                                   |
|------|-------------------------------------------------|-----|-------------------------------------------------|------------------|--------------------|--------------------|---------------------|---------|-------|--------|-------------|--------------|---------------------|------------------|-------|-----------------------------------|
|      | S1                                              | S2  | vol total / $\mu$ l                             | vol S1 / $\mu$ l |                    |                    |                     |         |       |        |             |              |                     |                  |       | vol S2 / $\mu$ l                  |
| 1    | 1                                               | 0   | 600                                             | 600              | 0                  | 48.3936            | 18.4405             | 48.6211 | 12.50 | 0.00   | 0.000       | 48.6211      | 0.0000              |                  |       |                                   |
| 2    | 0.9                                             | 0.1 | 600                                             | 540              | 60                 | 48.3234            | 18.4398             | 48.4895 | 11.25 | 6.71   | 0.011       | 48.4316      | 0.0014              |                  |       |                                   |
| 3    | 0.8                                             | 0.2 | 600                                             | 480              | 120                | 48.7354            | 18.4409             | 48.2745 | 10.00 | 13.43  | 0.025       | 48.2312      | 0.0019              | $\Delta$ alpha 0 | -0.95 | 0                                 |
| 4    | 0.7                                             | 0.3 | 600                                             | 420              | 180                | 48.5217            | 18.4496             | 48.0521 | 8.75  | 20.14  | 0.041       | 48.0162      | 0.0013              | $\Delta$ alpha 1 | -1.03 | 0.8 CHCl <sub>3</sub>             |
| 5    | 0.6                                             | 0.4 | 600                                             | 360              | 240                | 48.2784            | 18.4407             | 47.8177 | 7.50  | 26.85  | 0.063       | 47.7802      | 0.0014              | $\Delta$ alpha 2 | -1.21 | 2.2 C <sub>6</sub> H <sub>6</sub> |
| 6    | 0.5                                             | 0.5 | 600                                             | 300              | 300                | 47.9829            | 18.4429             | 47.5206 | 6.25  | 33.57  | 0.092       | 47.5100      | 0.0001              |                  |       |                                   |
| 7    | 0.4                                             | 0.6 | 600                                             | 240              | 360                | 47.5099            | 18.3112             | 47.1787 | 5.00  | 40.28  | 0.132       | 47.1964      | 0.0003              |                  |       |                                   |
| 8    | 0.3                                             | 0.7 | 600                                             | 180              | 420                | 47.2159            | 18.4528             | 46.7431 | 3.75  | 47.00  | 0.191       | 46.7943      | 0.0026              |                  |       |                                   |
| 9    | 0.2                                             | 0.8 | 600                                             | 120              | 480                | 46.6380            | 18.4465             | 46.1715 | 2.50  | 53.71  | 0.288       | 46.2247      | 0.0028              |                  |       |                                   |
| 10   | 0.1                                             | 0.9 | 600                                             | 60               | 540                | 45.7744            | 18.4430             | 45.3114 | 1.25  | 60.42  | 0.476       | 45.2509      | 0.0037              |                  |       |                                   |
| 11   | 0                                               | 1   | 600                                             | 0                | 600                | 43.2811            | 18.4671             | 42.7940 | 0.00  | 67.14  | 1.000       | 42.7940      | 0.0000              |                  |       |                                   |
|      |                                                 |     | total vol of stock                              | 3300             | 3300               |                    |                     |         |       |        |             | ss residuals | 0.0155              |                  |       |                                   |
|      |                                                 |     | $\rho$ uncorrected                              |                  |                    |                    |                     |         |       |        |             |              |                     |                  |       |                                   |
|      |                                                 |     | $\rho$                                          |                  |                    |                    |                     |         |       |        |             |              |                     |                  |       |                                   |
|      |                                                 |     | conc / M                                        |                  |                    |                    |                     |         |       |        |             |              |                     |                  |       |                                   |
|      |                                                 |     | FW                                              |                  |                    |                    |                     |         |       |        |             |              |                     |                  |       |                                   |
|      |                                                 |     | density                                         |                  |                    |                    |                     |         |       |        |             |              |                     |                  |       |                                   |
|      |                                                 |     | N sites                                         |                  |                    |                    |                     |         |       |        |             |              |                     |                  |       |                                   |
|      |                                                 |     | Phosphine Oxide                                 |                  |                    |                    |                     |         |       |        |             |              |                     |                  |       |                                   |
|      |                                                 |     | weight / g                                      |                  |                    |                    |                     |         |       |        |             |              |                     |                  |       |                                   |
|      |                                                 |     | weight solvent / g                              |                  |                    |                    |                     |         |       |        |             |              |                     |                  |       |                                   |
|      |                                                 |     | V solvent / mL                                  |                  |                    |                    |                     |         |       |        |             |              |                     |                  |       |                                   |
|      |                                                 |     | conc / mM                                       |                  |                    |                    |                     |         |       |        |             |              |                     |                  |       |                                   |
|      |                                                 |     | External Reference                              |                  |                    |                    |                     |         |       |        |             |              |                     |                  |       |                                   |
|      |                                                 |     | Methylenediphosphonic acid                      |                  |                    |                    |                     |         |       |        |             |              |                     |                  |       |                                   |
|      |                                                 |     | M <sub>d</sub> / ppm                            |                  |                    |                    |                     |         |       |        |             |              |                     |                  |       |                                   |
|      |                                                 |     | FW                                              |                  |                    |                    |                     |         |       |        |             |              |                     |                  |       |                                   |
|      |                                                 |     | weight / g                                      |                  |                    |                    |                     |         |       |        |             |              |                     |                  |       |                                   |
|      |                                                 |     | V / mL                                          |                  |                    |                    |                     |         |       |        |             |              |                     |                  |       |                                   |
|      |                                                 |     | conc / mM                                       |                  |                    |                    |                     |         |       |        |             |              |                     |                  |       |                                   |

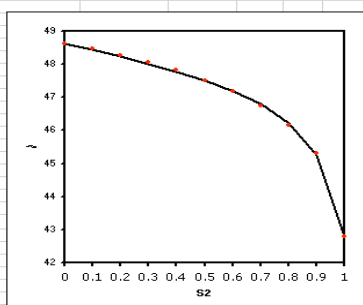

## 2.6. Chloroform-Carbon tetrachloride

| Expt                       | CHCl3   |         | CCl4   |        | vol total / $\mu$ l | vol S1 / $\mu$ l | vol S2 / $\mu$ l | $\delta_{\text{exp}}$ / ppm | $\delta_{\text{ref}}$ / ppm | $\delta_{\text{calc}}$ / ppm | [S1]  | [S2]  | [A-S2] | $\rho$ calc  | $\rho$ error | $\Delta G$ / kJ/mol | Kb2 / M-1 | error     |
|----------------------------|---------|---------|--------|--------|---------------------|------------------|------------------|-----------------------------|-----------------------------|------------------------------|-------|-------|--------|--------------|--------------|---------------------|-----------|-----------|
|                            | S1      | S2      | S1     | S2     |                     |                  |                  |                             |                             |                              |       |       |        |              |              |                     |           |           |
| 1                          | 1       | 0       | 600    | 0      | 600                 | 600              | 0                | 43.0376                     | 18.4422                     | 43.5754                      | 12.50 | 0.00  | 0.000  | 43.5754      | 0.0000       |                     |           |           |
| 2                          | 0.9     | 0.1     | 600    | 540    | 600                 | 540              | 60               | 43.7339                     | 18.4449                     | 43.2291                      | 11.25 | 4.15  | 0.008  | 43.2949      | 0.0043       |                     |           |           |
| 3                          | 0.8     | 0.2     | 600    | 480    | 600                 | 480              | 120              | 48.6996                     | 18.4439                     | 48.2397                      | 10.00 | 8.29  | 0.019  | 48.2055      | 0.0009       | $\Delta$ alpha 0    | -0.90     | 0         |
| 4                          | 0.7     | 0.3     | 600    | 420    | 600                 | 420              | 180              | 48.5000                     | 18.4488                     | 48.0312                      | 8.75  | 12.44 | 0.032  | 48.0040      | 0.0007       | $\Delta$ alpha 1    | -0.98     | 0.8 CHCl3 |
| 5                          | 0.6     | 0.4     | 600    | 360    | 600                 | 360              | 240              | 48.2873                     | 18.4390                     | 47.8283                      | 7.50  | 16.58 | 0.048  | 47.7849      | 0.0019       | $\Delta$ alpha 2    | -0.96     | 0.6 CCl4  |
| 6                          | 0.5     | 0.5     | 600    | 300    | 600                 | 300              | 300              | 48.0129                     | 18.4426                     | 47.5902                      | 6.25  | 20.73 | 0.071  | 47.5293      | 0.0001       |                     |           |           |
| 7                          | 0.4     | 0.6     | 600    | 240    | 600                 | 240              | 360              | 47.7341                     | 18.4509                     | 47.2832                      | 5.00  | 24.87 | 0.103  | 47.2596      | 0.0002       | a2-a1               | -1.0      |           |
| 8                          | 0.3     | 0.7     | 600    | 180    | 600                 | 180              | 420              | 47.3124                     | 18.4566                     | 46.8368                      | 3.75  | 29.02 | 0.151  | 46.8951      | 0.0023       |                     |           |           |
| 9                          | 0.2     | 0.8     | 600    | 120    | 600                 | 120              | 480              | 46.7817                     | 18.4476                     | 46.3141                      | 2.50  | 33.16 | 0.234  | 46.3612      | 0.0022       |                     |           |           |
| 10                         | 0.1     | 0.9     | 600    | 60     | 600                 | 60               | 540              | 45.9219                     | 18.4422                     | 45.4597                      | 1.25  | 37.31 | 0.407  | 45.4186      | 0.0017       |                     |           |           |
| 11                         | 0       | 1       | 600    | 0      | 600                 | 0                | 600              | 43.0227                     | 18.4673                     | 42.5354                      | 0.00  | 41.45 | 1.000  | 42.5354      | 0.0000       |                     |           |           |
| total vol of stock         |         |         |        |        |                     | 3300             | 3300             |                             |                             | -6.04                        |       |       |        | ss residuals | 0.0144       |                     |           |           |
| $\rho$ 2 uncorrected       |         |         |        |        |                     |                  |                  |                             |                             |                              |       |       |        |              |              |                     |           |           |
| $\rho$                     | 43.5754 | 42.5354 |        |        | 43.9525             |                  |                  |                             |                             |                              |       |       |        |              |              |                     |           |           |
| conc / M                   | 12.499  | 41.451  |        |        |                     |                  |                  |                             |                             |                              |       |       |        |              |              |                     |           |           |
| FW                         | 119.38  | 153.82  |        |        |                     |                  |                  |                             |                             |                              |       |       |        |              |              |                     |           |           |
| density                    | 1.492   | 1.534   |        |        |                     |                  |                  |                             |                             |                              |       |       |        |              |              |                     |           |           |
| N sites                    | 1       | 4       |        |        |                     |                  |                  |                             |                             |                              |       |       |        |              |              |                     |           |           |
| <b>Phosphine Oxide</b>     |         |         |        |        |                     |                  |                  |                             |                             |                              |       |       |        |              |              |                     |           |           |
|                            |         |         | CHCl3  | CCl4   |                     |                  |                  |                             |                             |                              |       |       |        |              |              |                     |           |           |
| weight / g                 |         |         | 0.0101 | 0.0113 |                     |                  |                  |                             |                             |                              |       |       |        |              |              |                     |           |           |
| FW                         | 218.32  |         | 7.3791 | 8.8202 |                     |                  |                  |                             |                             |                              |       |       |        |              |              |                     |           |           |
| p                          | 97%     |         | 4.9458 | 5.5334 |                     |                  |                  |                             |                             |                              |       |       |        |              |              |                     |           |           |
|                            |         |         | 9.0733 | 9.0733 |                     |                  |                  |                             |                             |                              |       |       |        |              |              |                     |           |           |
| <b>External Reference</b>  |         |         |        |        |                     |                  |                  |                             |                             |                              |       |       |        |              |              |                     |           |           |
| Methylenediphosphonic acid |         |         |        |        |                     |                  |                  |                             |                             |                              |       |       |        |              |              |                     |           |           |
| $\delta$ / ppm             | 17.98   |         |        |        |                     |                  |                  |                             |                             |                              |       |       |        |              |              |                     |           |           |
| FW                         | 176.00  |         |        |        |                     |                  |                  |                             |                             |                              |       |       |        |              |              |                     |           |           |
| weight / g                 | 0.0177  |         |        |        |                     |                  |                  |                             |                             |                              |       |       |        |              |              |                     |           |           |
| V / mL                     | 2       |         |        |        |                     |                  |                  |                             |                             |                              |       |       |        |              |              |                     |           |           |
| conc / mM                  | 50.28   |         |        |        |                     |                  |                  |                             |                             |                              |       |       |        |              |              |                     |           |           |

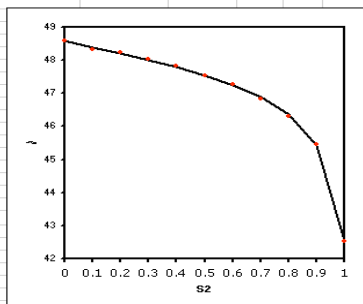

| Expt                       | CHCl3   |         | CCl4   |        | vol total / $\mu$ l | vol S1 / $\mu$ l | vol S2 / $\mu$ l | $\delta_{\text{exp}}$ / ppm | $\delta_{\text{ref}}$ / ppm | $\delta_{\text{calc}}$ / ppm | [S1]  | [S2]  | [A-S2] | $\rho$ calc  | $\rho$ error | $\Delta G$ / kJ/mol | Kb2 / M-1 | error     |
|----------------------------|---------|---------|--------|--------|---------------------|------------------|------------------|-----------------------------|-----------------------------|------------------------------|-------|-------|--------|--------------|--------------|---------------------|-----------|-----------|
|                            | S1      | S2      | S1     | S2     |                     |                  |                  |                             |                             |                              |       |       |        |              |              |                     |           |           |
| 1                          | 1       | 0       | 600    | 0      | 600                 | 600              | 0                | 43.0296                     | 18.4622                     | 43.5474                      | 12.50 | 0.00  | 0.000  | 43.5474      | 0.0000       |                     |           |           |
| 2                          | 0.9     | 0.1     | 600    | 540    | 600                 | 540              | 60               | 48.8636                     | 18.4449                     | 48.4047                      | 11.25 | 4.15  | 0.008  | 48.2722      | 0.0011       |                     |           |           |
| 3                          | 0.8     | 0.2     | 600    | 480    | 600                 | 480              | 120              | 48.6984                     | 18.4486                     | 48.2298                      | 10.00 | 8.29  | 0.018  | 48.1883      | 0.0017       | $\Delta$ alpha 0    | -0.91     | 0         |
| 4                          | 0.7     | 0.3     | 600    | 420    | 600                 | 420              | 180              | 48.5007                     | 18.4578                     | 48.0229                      | 8.75  | 12.44 | 0.031  | 47.9322      | 0.0009       | $\Delta$ alpha 1    | -0.99     | 0.8 CHCl3 |
| 5                          | 0.6     | 0.4     | 600    | 360    | 600                 | 360              | 240              | 48.2786                     | 18.4500                     | 47.8096                      | 7.50  | 16.58 | 0.047  | 47.7786      | 0.0009       | $\Delta$ alpha 2    | -0.96     | 0.6 CCl4  |
| 6                          | 0.5     | 0.5     | 600    | 300    | 600                 | 300              | 300              | 48.0211                     | 18.4421                     | 47.5590                      | 6.25  | 20.73 | 0.069  | 47.5395      | 0.0004       |                     |           |           |
| 7                          | 0.4     | 0.6     | 600    | 240    | 600                 | 240              | 360              | 47.7137                     | 18.4435                     | 47.2502                      | 5.00  | 24.87 | 0.101  | 47.2554      | 0.0000       | a2-a1               | -1.0      |           |
| 8                          | 0.3     | 0.7     | 600    | 180    | 600                 | 180              | 420              | 47.3188                     | 18.4515                     | 46.8473                      | 3.75  | 29.02 | 0.148  | 46.8952      | 0.0023       |                     |           |           |
| 9                          | 0.2     | 0.8     | 600    | 120    | 600                 | 120              | 480              | 46.8931                     | 18.5621                     | 46.3110                      | 2.50  | 33.16 | 0.230  | 46.3756      | 0.0042       |                     |           |           |
| 10                         | 0.1     | 0.9     | 600    | 60     | 600                 | 60               | 540              | 45.9498                     | 18.4424                     | 45.4874                      | 1.25  | 37.31 | 0.402  | 45.4319      | 0.0031       |                     |           |           |
| 11                         | 0       | 1       | 600    | 0      | 600                 | 0                | 600              | 42.9470                     | 18.4424                     | 42.4946                      | 0.00  | 41.45 | 1.000  | 42.4946      | 0.0000       |                     |           |           |
| total vol of stock         |         |         |        |        |                     | 3300             | 3300             |                             |                             | -8.06                        |       |       |        | ss residuals | 0.0148       |                     |           |           |
| $\rho$ 2 uncorrected       |         |         |        |        |                     |                  |                  |                             |                             |                              |       |       |        |              |              |                     |           |           |
| $\rho$                     | 43.5474 | 42.4946 |        |        | 43.9505             |                  |                  |                             |                             |                              |       |       |        |              |              |                     |           |           |
| conc / M                   | 12.498  | 41.451  |        |        |                     |                  |                  |                             |                             |                              |       |       |        |              |              |                     |           |           |
| FW                         | 119.38  | 153.82  |        |        |                     |                  |                  |                             |                             |                              |       |       |        |              |              |                     |           |           |
| density                    | 1.492   | 1.534   |        |        |                     |                  |                  |                             |                             |                              |       |       |        |              |              |                     |           |           |
| N sites                    | 1       | 4       |        |        |                     |                  |                  |                             |                             |                              |       |       |        |              |              |                     |           |           |
| <b>Phosphine Oxide</b>     |         |         |        |        |                     |                  |                  |                             |                             |                              |       |       |        |              |              |                     |           |           |
|                            |         |         | CHCl3  | CCl4   |                     |                  |                  |                             |                             |                              |       |       |        |              |              |                     |           |           |
| weight / g                 |         |         | 0.0103 | 0.0096 |                     |                  |                  |                             |                             |                              |       |       |        |              |              |                     |           |           |
| FW                         | 218.32  |         | 7.3000 | 7.1933 |                     |                  |                  |                             |                             |                              |       |       |        |              |              |                     |           |           |
| p                          | 97%     |         | 4.8328 | 4.5127 |                     |                  |                  |                             |                             |                              |       |       |        |              |              |                     |           |           |
|                            |         |         | 9.3532 | 9.3532 |                     |                  |                  |                             |                             |                              |       |       |        |              |              |                     |           |           |
| <b>External Reference</b>  |         |         |        |        |                     |                  |                  |                             |                             |                              |       |       |        |              |              |                     |           |           |
| Methylenediphosphonic acid |         |         |        |        |                     |                  |                  |                             |                             |                              |       |       |        |              |              |                     |           |           |
| $\delta$ / ppm             | 17.98   |         |        |        |                     |                  |                  |                             |                             |                              |       |       |        |              |              |                     |           |           |
| FW                         | 176.00  |         |        |        |                     |                  |                  |                             |                             |                              |       |       |        |              |              |                     |           |           |
| weight / g                 | 0.0177  |         |        |        |                     |                  |                  |                             |                             |                              |       |       |        |              |              |                     |           |           |
| V / mL                     | 2       |         |        |        |                     |                  |                  |                             |                             |                              |       |       |        |              |              |                     |           |           |
| conc / mM                  | 50.28   |         |        |        |                     |                  |                  |                             |                             |                              |       |       |        |              |              |                     |           |           |

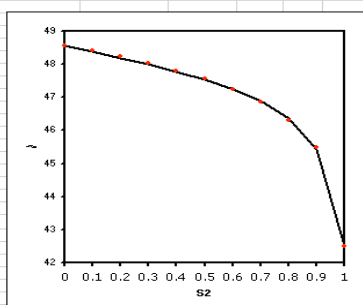

## 2.7. Chloroform-Dichloromethane

| Expt                       | CHCl3   |                    | DCM                 |                  | CHCl3            |                  | DCM              |         | $\delta_{exp}$ / ppm | $\delta_{ref}$ / ppm | $\delta_{calc}$ / ppm | [S1]         | [S2]   | [A-S2] | $\rho$ calc | $\rho$ error | $\Delta G$ / kJmol | Kb2 / M-1 | error |          |        |
|----------------------------|---------|--------------------|---------------------|------------------|------------------|------------------|------------------|---------|----------------------|----------------------|-----------------------|--------------|--------|--------|-------------|--------------|--------------------|-----------|-------|----------|--------|
|                            | S1      | S2                 | vol total / $\mu$ l | vol S1 / $\mu$ l | vol S2 / $\mu$ l | vol S1 / $\mu$ l | vol S2 / $\mu$ l | 0.5404  |                      |                      |                       |              |        |        |             |              |                    |           |       | 1.77E-01 | 0.0116 |
| 1                          | 1       | 0                  | 600                 | 600              | 0                | 43.7707          | 19.0399          | 48.7108 | 12.50                | 0.000                | 0.000                 | 48.7108      | 0.0000 |        |             |              |                    |           |       |          |        |
| 2                          | 0.9     | 0.1                | 600                 | 540              | 60               | 43.7264          | 19.0375          | 48.6526 | 11.25                | 3.12                 | 0.047                 | 48.6511      | 0.0003 |        |             |              |                    |           |       |          |        |
| 3                          | 0.8     | 0.2                | 600                 | 480              | 120              | 43.6353          | 19.0386          | 48.5767 | 10.00                | 6.24                 | 0.100                 | 48.5772      | 0.0000 |        |             |              |                    |           |       |          |        |
| 4                          | 0.7     | 0.3                | 600                 | 420              | 180              | 43.5431          | 19.0413          | 48.4818 | 8.75                 | 9.36                 | 0.159                 | 48.4861      | 0.0000 |        |             |              |                    |           |       |          |        |
| 5                          | 0.6     | 0.4                | 600                 | 360              | 240              | 43.4130          | 19.0392          | 48.3538 | 7.50                 | 12.48                | 0.228                 | 48.3742      | 0.0004 |        |             |              |                    |           |       |          |        |
| 6                          | 0.5     | 0.5                | 600                 | 300              | 300              | 43.2889          | 19.0376          | 48.2414 | 6.25                 | 15.60                | 0.307                 | 48.2366      | 0.0000 |        |             |              |                    |           |       |          |        |
| 7                          | 0.4     | 0.6                | 600                 | 240              | 360              | 43.1386          | 19.0397          | 48.0789 | 5.00                 | 18.72                | 0.389                 | 48.0669      | 0.0001 |        |             |              |                    |           |       |          |        |
| 8                          | 0.3     | 0.7                | 600                 | 180              | 420              | 43.0360          | 19.0603          | 47.9557 | 3.75                 | 21.84                | 0.508                 | 47.8562      | 0.0000 |        |             |              |                    |           |       |          |        |
| 9                          | 0.2     | 0.8                | 600                 | 120              | 480              | 43.8745          | 19.0496          | 47.6049 | 2.50                 | 24.96                | 0.639                 | 47.5323      | 0.0002 |        |             |              |                    |           |       |          |        |
| 10                         | 0.1     | 0.9                | 600                 | 60               | 540              | 43.3044          | 19.0476          | 47.2368 | 1.25                 | 28.08                | 0.799                 | 47.2571      | 0.0004 |        |             |              |                    |           |       |          |        |
| 11                         | 0       | 1                  | 600                 | 0                | 600              | 47.9189          | 19.0751          | 46.8238 | 0.00                 | 31.20                | 1.000                 | 46.8238      | 0.0000 |        |             |              |                    |           |       |          |        |
|                            |         |                    | total vol of stock  |                  | 3300             | 3300             |                  |         | -1.88                |                      |                       | ss residuals |        | 0.0015 |             |              |                    |           |       |          |        |
| $\rho$ uncorrected         |         |                    |                     |                  |                  |                  |                  |         |                      |                      |                       |              |        |        |             |              |                    |           |       |          |        |
| $\rho$                     | 48.7108 | 46.8238            |                     |                  | 46.2834          |                  |                  |         |                      |                      |                       |              |        |        |             |              |                    |           |       |          |        |
| conc / M                   | 12.498  | 31.202             |                     |                  |                  |                  |                  |         |                      |                      |                       |              |        |        |             |              |                    |           |       |          |        |
| FW                         | 118.38  | 84.93              |                     |                  |                  |                  |                  |         |                      |                      |                       |              |        |        |             |              |                    |           |       |          |        |
| density                    | 1.492   | 1.325              |                     |                  |                  |                  |                  |         |                      |                      |                       |              |        |        |             |              |                    |           |       |          |        |
| N sites                    | 1       | 2                  |                     |                  |                  |                  |                  |         |                      |                      |                       |              |        |        |             |              |                    |           |       |          |        |
| <b>Phosphine Oxide</b>     |         |                    | CHCl3               |                  | DCM              |                  |                  |         |                      |                      |                       |              |        |        |             |              |                    |           |       |          |        |
| FW                         | 218.32  | weight / g         | 0.0100              | 0.0110           |                  |                  |                  |         |                      |                      |                       |              |        |        |             |              |                    |           |       |          |        |
| p                          | 97%     | weight solvent / g | 7.4264              | 7.2547           | 7.2533           |                  |                  |         |                      |                      |                       |              |        |        |             |              |                    |           |       |          |        |
|                            |         | V solvent / mL     | 4.9775              | 5.4752           | 5.4742           |                  |                  |         |                      |                      |                       |              |        |        |             |              |                    |           |       |          |        |
|                            |         | conc / mM          | 8.9262              | 8.9262           | 8.9279           |                  |                  |         |                      |                      |                       |              |        |        |             |              |                    |           |       |          |        |
| <b>External Reference</b>  |         |                    |                     |                  |                  |                  |                  |         |                      |                      |                       |              |        |        |             |              |                    |           |       |          |        |
| Methylenediphosphonic acid |         |                    |                     |                  |                  |                  |                  |         |                      |                      |                       |              |        |        |             |              |                    |           |       |          |        |
| $\delta$ / ppm             | 17.98   |                    |                     |                  |                  |                  |                  |         |                      |                      |                       |              |        |        |             |              |                    |           |       |          |        |
| FW                         | 176.00  |                    |                     |                  |                  |                  |                  |         |                      |                      |                       |              |        |        |             |              |                    |           |       |          |        |
| weight / g                 | 0.0177  |                    |                     |                  |                  |                  |                  |         |                      |                      |                       |              |        |        |             |              |                    |           |       |          |        |
| V / mL                     | 2       |                    |                     |                  |                  |                  |                  |         |                      |                      |                       |              |        |        |             |              |                    |           |       |          |        |
| conc / mM                  | 50.28   |                    |                     |                  |                  |                  |                  |         |                      |                      |                       |              |        |        |             |              |                    |           |       |          |        |

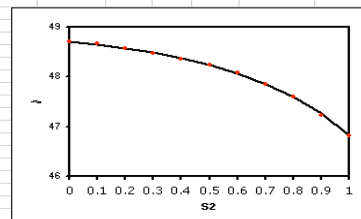

| Expt                       | CHCl3   |                    | DCM                 |                  | CHCl3            |                  | DCM              |         | $\delta_{exp}$ / ppm | $\delta_{ref}$ / ppm | $\delta_{calc}$ / ppm | [S1]         | [S2]   | [A-S2] | $\rho$ calc | $\rho$ error | $\Delta G$ / kJmol | Kb2 / M-1 | error |          |        |
|----------------------------|---------|--------------------|---------------------|------------------|------------------|------------------|------------------|---------|----------------------|----------------------|-----------------------|--------------|--------|--------|-------------|--------------|--------------------|-----------|-------|----------|--------|
|                            | S1      | S2                 | vol total / $\mu$ l | vol S1 / $\mu$ l | vol S2 / $\mu$ l | vol S1 / $\mu$ l | vol S2 / $\mu$ l | 0.1519  |                      |                      |                       |              |        |        |             |              |                    |           |       | 1.56E-01 | 0.0089 |
| 1                          | 1       | 0                  | 600                 | 600              | 0                | 43.7767          | 19.0443          | 48.7124 | 12.50                | 0.000                | 0.000                 | 48.7124      | 0.0000 |        |             |              |                    |           |       |          |        |
| 2                          | 0.9     | 0.1                | 600                 | 540              | 60               | 43.7001          | 19.0446          | 48.6355 | 11.25                | 3.12                 | 0.042                 | 48.6431      | 0.0001 |        |             |              |                    |           |       |          |        |
| 3                          | 0.8     | 0.2                | 600                 | 480              | 120              | 43.6225          | 19.0449          | 48.5576 | 10.00                | 6.24                 | 0.089                 | 48.5620      | 0.0000 |        |             |              |                    |           |       |          |        |
| 4                          | 0.7     | 0.3                | 600                 | 420              | 180              | 43.5310          | 19.0487          | 48.4623 | 8.75                 | 9.36                 | 0.143                 | 48.4666      | 0.0000 |        |             |              |                    |           |       |          |        |
| 5                          | 0.6     | 0.4                | 600                 | 360              | 240              | 43.4094          | 19.0450          | 48.3444 | 7.50                 | 12.48                | 0.206                 | 48.3533      | 0.0001 |        |             |              |                    |           |       |          |        |
| 6                          | 0.5     | 0.5                | 600                 | 300              | 300              | 43.2636          | 19.0450          | 48.2166 | 6.25                 | 15.60                | 0.291                 | 48.2175      | 0.0000 |        |             |              |                    |           |       |          |        |
| 7                          | 0.4     | 0.6                | 600                 | 240              | 360              | 43.1389          | 19.0471          | 48.0718 | 5.00                 | 18.72                | 0.369                 | 48.0526      | 0.0004 |        |             |              |                    |           |       |          |        |
| 8                          | 0.3     | 0.7                | 600                 | 180              | 420              | 43.0379          | 19.0680          | 47.8499 | 3.75                 | 21.84                | 0.476                 | 47.8493      | 0.0000 |        |             |              |                    |           |       |          |        |
| 9                          | 0.2     | 0.8                | 600                 | 120              | 480              | 43.8731          | 19.0557          | 47.5974 | 2.50                 | 24.96                | 0.609                 | 47.5940      | 0.0000 |        |             |              |                    |           |       |          |        |
| 10                         | 0.1     | 0.9                | 600                 | 60               | 540              | 43.3226          | 19.0544          | 47.2482 | 1.25                 | 28.08                | 0.778                 | 47.2695      | 0.0003 |        |             |              |                    |           |       |          |        |
| 11                         | 0       | 1                  | 600                 | 0                | 600              | 47.9295          | 19.0790          | 46.8295 | 0.00                 | 31.20                | 1.000                 | 46.8295      | 0.0000 |        |             |              |                    |           |       |          |        |
|                            |         |                    | total vol of stock  |                  | 3300             | 3300             |                  |         | -1.88                |                      |                       | ss residuals |        | 0.0009 |             |              |                    |           |       |          |        |
| $\rho$ uncorrected         |         |                    |                     |                  |                  |                  |                  |         |                      |                      |                       |              |        |        |             |              |                    |           |       |          |        |
| $\rho$                     | 48.7124 | 46.8295            |                     |                  | 46.6776          |                  |                  |         |                      |                      |                       |              |        |        |             |              |                    |           |       |          |        |
| conc / M                   | 12.498  | 31.202             |                     |                  |                  |                  |                  |         |                      |                      |                       |              |        |        |             |              |                    |           |       |          |        |
| FW                         | 118.38  | 84.93              |                     |                  |                  |                  |                  |         |                      |                      |                       |              |        |        |             |              |                    |           |       |          |        |
| density                    | 1.492   | 1.325              |                     |                  |                  |                  |                  |         |                      |                      |                       |              |        |        |             |              |                    |           |       |          |        |
| N sites                    | 1       | 2                  |                     |                  |                  |                  |                  |         |                      |                      |                       |              |        |        |             |              |                    |           |       |          |        |
| <b>Phosphine Oxide</b>     |         |                    | CHCl3               |                  | DCM              |                  |                  |         |                      |                      |                       |              |        |        |             |              |                    |           |       |          |        |
| FW                         | 218.32  | weight / g         | 0.0104              | 0.0108           |                  |                  |                  |         |                      |                      |                       |              |        |        |             |              |                    |           |       |          |        |
| p                          | 97%     | weight solvent / g | 7.4162              | 6.9027           | 6.904            |                  |                  |         |                      |                      |                       |              |        |        |             |              |                    |           |       |          |        |
|                            |         | V solvent / mL     | 4.9706              | 5.2096           | 5.2106           |                  |                  |         |                      |                      |                       |              |        |        |             |              |                    |           |       |          |        |
|                            |         | conc / mM          | 9.2961              | 9.2961           | 9.2944           |                  |                  |         |                      |                      |                       |              |        |        |             |              |                    |           |       |          |        |
| <b>External Reference</b>  |         |                    |                     |                  |                  |                  |                  |         |                      |                      |                       |              |        |        |             |              |                    |           |       |          |        |
| Methylenediphosphonic acid |         |                    |                     |                  |                  |                  |                  |         |                      |                      |                       |              |        |        |             |              |                    |           |       |          |        |
| $\delta$ / ppm             | 17.96   |                    |                     |                  |                  |                  |                  |         |                      |                      |                       |              |        |        |             |              |                    |           |       |          |        |
| FW                         | 176.00  |                    |                     |                  |                  |                  |                  |         |                      |                      |                       |              |        |        |             |              |                    |           |       |          |        |
| weight / g                 | 0.0177  |                    |                     |                  |                  |                  |                  |         |                      |                      |                       |              |        |        |             |              |                    |           |       |          |        |
| V / mL                     | 2       |                    |                     |                  |                  |                  |                  |         |                      |                      |                       |              |        |        |             |              |                    |           |       |          |        |
| conc / mM                  | 50.28   |                    |                     |                  |                  |                  |                  |         |                      |                      |                       |              |        |        |             |              |                    |           |       |          |        |

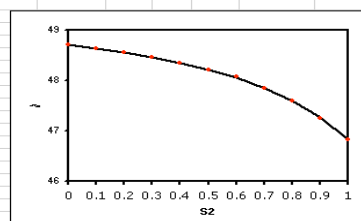

## 2.8. Chloroform-DMSO

| Expt                       | CHCl3   |                    | DMSO                |                  | CHCl3            |                  | DMSO             |          | $\delta_{\text{exp}}$ / ppm | $\delta_{\text{ref}}$ / ppm | $\delta_{\text{calc}}$ / ppm | [S1]         | [S2]   | [A-S2] | $\rho$ calc | $\rho$ error | $\Delta G$ / kJ/mol | Kb2 / M-1 | error |
|----------------------------|---------|--------------------|---------------------|------------------|------------------|------------------|------------------|----------|-----------------------------|-----------------------------|------------------------------|--------------|--------|--------|-------------|--------------|---------------------|-----------|-------|
|                            | S1      | S2                 | vol total / $\mu$ l | vol S1 / $\mu$ l | vol S2 / $\mu$ l | vol S1 / $\mu$ l | vol S2 / $\mu$ l | 3.02E-01 |                             |                             |                              |              |        |        |             |              |                     |           |       |
| 1                          | 1       | 0                  | 600                 | 600              | 0                | 49.0295          | 18.4446          | 48.5609  | 12.50                       | 0.00                        | 0.000                        | 48.5609      | 0.0000 |        |             |              |                     |           |       |
| 2                          | 0.9     | 0.1                | 600                 | 540              | 60               | 49.1473          | 18.4450          | 48.6523  | 11.25                       | 8.45                        | 0.404                        | 48.7013      | 0.0004 |        |             |              |                     |           |       |
| 3                          | 0.8     | 0.2                | 600                 | 480              | 120              | 49.0931          | 18.4437          | 48.6294  | 10.00                       | 16.89                       | 0.604                        | 48.6122      | 0.0003 |        |             |              |                     |           |       |
| 4                          | 0.7     | 0.3                | 600                 | 420              | 180              | 48.9284          | 18.4534          | 48.4950  | 8.75                        | 25.34                       | 0.723                        | 48.4323      | 0.0005 |        |             |              |                     |           |       |
| 5                          | 0.6     | 0.4                | 600                 | 360              | 240              | 48.6666          | 18.4429          | 48.2037  | 7.50                        | 33.79                       | 0.802                        | 48.2073      | 0.0000 |        |             |              |                     |           |       |
| 6                          | 0.5     | 0.5                | 600                 | 300              | 300              | 48.3977          | 18.4430          | 47.9347  | 6.25                        | 42.24                       | 0.899                        | 47.9966      | 0.0005 |        |             |              |                     |           |       |
| 7                          | 0.4     | 0.6                | 600                 | 240              | 360              | 48.1390          | 18.4500          | 47.6890  | 5.00                        | 50.68                       | 0.901                        | 47.6999      | 0.0005 |        |             |              |                     |           |       |
| 8                          | 0.3     | 0.7                | 600                 | 180              | 420              | 47.8919          | 18.4564          | 47.4055  | 3.75                        | 59.13                       | 0.934                        | 47.4126      | 0.0001 |        |             |              |                     |           |       |
| 9                          | 0.2     | 0.8                | 600                 | 120              | 480              | 47.6165          | 18.4485          | 47.1480  | 2.50                        | 67.58                       | 0.961                        | 47.1278      | 0.0004 |        |             |              |                     |           |       |
| 10                         | 0.1     | 0.9                | 600                 | 60               | 540              | 47.3513          | 18.4500          | 46.8813  | 1.25                        | 76.03                       | 0.982                        | 46.8376      | 0.0019 |        |             |              |                     |           |       |
| 11                         | 0       | 1                  | 600                 | 0                | 600              | 47.0356          | 18.4722          | 46.5434  | 0.00                        | 84.47                       | 1.000                        | 46.5434      | 0.0000 |        |             |              |                     |           |       |
|                            |         |                    | total vol of stock  |                  |                  | 3300             | 3300             |          |                             |                             | -2.02                        | ss residuals |        | 0.0045 |             |              |                     |           |       |
| $\rho$ uncorrected         |         |                    |                     |                  |                  |                  |                  |          |                             |                             |                              |              |        |        |             |              |                     |           |       |
| $\rho$                     | 48.5609 | 46.5434            |                     |                  | 49.6875          |                  |                  |          |                             |                             |                              |              |        |        |             |              |                     |           |       |
| conc / M                   | 12.498  | 84.475             |                     |                  |                  |                  |                  |          |                             |                             |                              |              |        |        |             |              |                     |           |       |
| FW                         | 119.38  | 78.13              |                     |                  |                  |                  |                  |          |                             |                             |                              |              |        |        |             |              |                     |           |       |
| density                    | 1.492   | 1.1                |                     |                  |                  |                  |                  |          |                             |                             |                              |              |        |        |             |              |                     |           |       |
| N sites                    | 1       | 8                  |                     |                  |                  |                  |                  |          |                             |                             |                              |              |        |        |             |              |                     |           |       |
|                            |         |                    | CHCl3               |                  | DMSO             |                  |                  |          |                             |                             |                              |              |        |        |             |              |                     |           |       |
| FW                         | 218.32  | weight / g         | 0.0105              | 0.0097           |                  |                  |                  |          |                             |                             |                              |              |        |        |             |              |                     |           |       |
| p                          | 97%     | weight solvent / g | 7.4294              | 5.0601           |                  |                  |                  |          |                             |                             |                              |              |        |        |             |              |                     |           |       |
|                            |         | V solvent / mL     | 4.9795              | 4.6001           |                  |                  |                  |          |                             |                             |                              |              |        |        |             |              |                     |           |       |
|                            |         | conc / mM          | 9.3688              | 9.3688           |                  |                  |                  |          |                             |                             |                              |              |        |        |             |              |                     |           |       |
| <b>External Reference</b>  |         |                    |                     |                  |                  |                  |                  |          |                             |                             |                              |              |        |        |             |              |                     |           |       |
| Methylenediphosphonic acid |         |                    |                     |                  |                  |                  |                  |          |                             |                             |                              |              |        |        |             |              |                     |           |       |
| $\delta$ / ppm             | 17.98   |                    |                     |                  |                  |                  |                  |          |                             |                             |                              |              |        |        |             |              |                     |           |       |
| FW                         | 176.00  |                    |                     |                  |                  |                  |                  |          |                             |                             |                              |              |        |        |             |              |                     |           |       |
| weight / g                 | 0.0177  |                    |                     |                  |                  |                  |                  |          |                             |                             |                              |              |        |        |             |              |                     |           |       |
| V / mL                     | 2       |                    |                     |                  |                  |                  |                  |          |                             |                             |                              |              |        |        |             |              |                     |           |       |
| conc / mM                  | 50.28   |                    |                     |                  |                  |                  |                  |          |                             |                             |                              |              |        |        |             |              |                     |           |       |

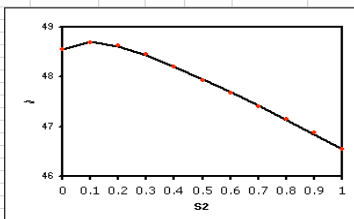

| Expt                       | CHCl3   |                    | DMSO                |                  | CHCl3            |                  | DMSO             |          | $\delta_{\text{exp}}$ / ppm | $\delta_{\text{ref}}$ / ppm | $\delta_{\text{calc}}$ / ppm | [S1]         | [S2]   | [A-S2] | $\rho$ calc | $\rho$ error | $\Delta G$ / kJ/mol | Kb2 / M-1 | error |
|----------------------------|---------|--------------------|---------------------|------------------|------------------|------------------|------------------|----------|-----------------------------|-----------------------------|------------------------------|--------------|--------|--------|-------------|--------------|---------------------|-----------|-------|
|                            | S1      | S2                 | vol total / $\mu$ l | vol S1 / $\mu$ l | vol S2 / $\mu$ l | vol S1 / $\mu$ l | vol S2 / $\mu$ l | 3.29E-01 |                             |                             |                              |              |        |        |             |              |                     |           |       |
| 1                          | 1       | 0                  | 600                 | 600              | 0                | 49.0492          | 18.4525          | 48.5727  | 12.50                       | 0.00                        | 0.000                        | 48.5727      | 0.0000 |        |             |              |                     |           |       |
| 2                          | 0.9     | 0.1                | 600                 | 540              | 60               | 49.1218          | 18.4550          | 48.6630  | 11.25                       | 8.45                        | 0.384                        | 48.6901      | 0.0007 |        |             |              |                     |           |       |
| 3                          | 0.8     | 0.2                | 600                 | 480              | 120              | 49.1218          | 18.4621          | 48.6197  | 10.00                       | 16.89                       | 0.584                        | 48.5996      | 0.0004 |        |             |              |                     |           |       |
| 4                          | 0.7     | 0.3                | 600                 | 420              | 180              | 48.9437          | 18.4630          | 48.4607  | 8.75                        | 25.34                       | 0.706                        | 48.4218      | 0.0015 |        |             |              |                     |           |       |
| 5                          | 0.6     | 0.4                | 600                 | 360              | 240              | 48.6669          | 18.4572          | 48.1937  | 7.50                        | 33.79                       | 0.789                        | 48.1991      | 0.0001 |        |             |              |                     |           |       |
| 6                          | 0.5     | 0.5                | 600                 | 300              | 300              | 48.3959          | 18.4545          | 47.9213  | 6.25                        | 42.24                       | 0.849                        | 47.9504      | 0.0008 |        |             |              |                     |           |       |
| 7                          | 0.4     | 0.6                | 600                 | 240              | 360              | 48.1398          | 18.4637          | 47.6561  | 5.00                        | 50.68                       | 0.894                        | 47.6952      | 0.0008 |        |             |              |                     |           |       |
| 8                          | 0.3     | 0.7                | 600                 | 180              | 420              | 47.8861          | 18.4671          | 47.3990  | 3.75                        | 59.13                       | 0.929                        | 47.4089      | 0.0001 |        |             |              |                     |           |       |
| 9                          | 0.2     | 0.8                | 600                 | 120              | 480              | 47.6234          | 18.4572          | 47.1462  | 2.50                        | 67.58                       | 0.957                        | 47.1247      | 0.0005 |        |             |              |                     |           |       |
| 10                         | 0.1     | 0.9                | 600                 | 60               | 540              | 47.3636          | 18.4420          | 46.9016  | 1.25                        | 76.03                       | 0.981                        | 46.8348      | 0.0045 |        |             |              |                     |           |       |
| 11                         | 0       | 1                  | 600                 | 0                | 600              | 47.0432          | 18.4626          | 46.5406  | 0.00                        | 84.47                       | 1.000                        | 46.5406      | 0.0000 |        |             |              |                     |           |       |
|                            |         |                    | total vol of stock  |                  |                  | 3300             | 3300             |          |                             |                             | -2.03                        | ss residuals |        | 0.0095 |             |              |                     |           |       |
| $\rho$ uncorrected         |         |                    |                     |                  |                  |                  |                  |          |                             |                             |                              |              |        |        |             |              |                     |           |       |
| $\rho$                     | 48.5727 | 46.5406            |                     |                  | 49.7022          |                  |                  |          |                             |                             |                              |              |        |        |             |              |                     |           |       |
| conc / M                   | 12.498  | 84.475             |                     |                  |                  |                  |                  |          |                             |                             |                              |              |        |        |             |              |                     |           |       |
| FW                         | 119.38  | 78.13              |                     |                  |                  |                  |                  |          |                             |                             |                              |              |        |        |             |              |                     |           |       |
| density                    | 1.492   | 1.1                |                     |                  |                  |                  |                  |          |                             |                             |                              |              |        |        |             |              |                     |           |       |
| N sites                    | 1       | 8                  |                     |                  |                  |                  |                  |          |                             |                             |                              |              |        |        |             |              |                     |           |       |
|                            |         |                    | CHCl3               |                  | DMSO             |                  |                  |          |                             |                             |                              |              |        |        |             |              |                     |           |       |
| FW                         | 218.32  | weight / g         | 0.0124              | 0.0110           |                  |                  |                  |          |                             |                             |                              |              |        |        |             |              |                     |           |       |
| p                          | 97%     | weight solvent / g | 7.3683              | 4.8191           |                  |                  |                  |          |                             |                             |                              |              |        |        |             |              |                     |           |       |
|                            |         | V solvent / mL     | 4.9385              | 4.3910           |                  |                  |                  |          |                             |                             |                              |              |        |        |             |              |                     |           |       |
|                            |         | conc / mM          | 11.658              | 11.658           |                  |                  |                  |          |                             |                             |                              |              |        |        |             |              |                     |           |       |
| <b>External Reference</b>  |         |                    |                     |                  |                  |                  |                  |          |                             |                             |                              |              |        |        |             |              |                     |           |       |
| Methylenediphosphonic acid |         |                    |                     |                  |                  |                  |                  |          |                             |                             |                              |              |        |        |             |              |                     |           |       |
| $\delta$ / ppm             | 17.98   |                    |                     |                  |                  |                  |                  |          |                             |                             |                              |              |        |        |             |              |                     |           |       |
| FW                         | 176.00  |                    |                     |                  |                  |                  |                  |          |                             |                             |                              |              |        |        |             |              |                     |           |       |
| weight / g                 | 0.0177  |                    |                     |                  |                  |                  |                  |          |                             |                             |                              |              |        |        |             |              |                     |           |       |
| V / mL                     | 2       |                    |                     |                  |                  |                  |                  |          |                             |                             |                              |              |        |        |             |              |                     |           |       |
| conc / mM                  | 50.28   |                    |                     |                  |                  |                  |                  |          |                             |                             |                              |              |        |        |             |              |                     |           |       |

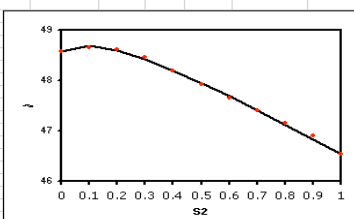

## 2.9. Cyclohexane-Benzene

|                                                                                                                                                                                                                                                                                                                                                                                                                                                                                                                                                                                |                            |         |                      |       |         |                  |                  |                    |                    |                     |       | $\Delta\rho$ / ppm | Kb2 / M-1    | error       |        |                     |      |  |  |       |                      |                    |                            |         |         |              |        |          |        |        |        |        |        |            |           |         |         |         |       |       |  |           |         |    |   |  |  |
|--------------------------------------------------------------------------------------------------------------------------------------------------------------------------------------------------------------------------------------------------------------------------------------------------------------------------------------------------------------------------------------------------------------------------------------------------------------------------------------------------------------------------------------------------------------------------------|----------------------------|---------|----------------------|-------|---------|------------------|------------------|--------------------|--------------------|---------------------|-------|--------------------|--------------|-------------|--------|---------------------|------|--|--|-------|----------------------|--------------------|----------------------------|---------|---------|--------------|--------|----------|--------|--------|--------|--------|--------|------------|-----------|---------|---------|---------|-------|-------|--|-----------|---------|----|---|--|--|
|                                                                                                                                                                                                                                                                                                                                                                                                                                                                                                                                                                                |                            |         |                      |       |         |                  |                  |                    |                    |                     |       | 0.6573             | 4.88E+00     | 0.0272      |        |                     |      |  |  |       |                      |                    |                            |         |         |              |        |          |        |        |        |        |        |            |           |         |         |         |       |       |  |           |         |    |   |  |  |
| Expt                                                                                                                                                                                                                                                                                                                                                                                                                                                                                                                                                                           | C6H12                      | Benzene | vol total / $\mu$ l  | C6H12 | Benzene | vol S1 / $\mu$ l | vol S2 / $\mu$ l | $\rho_{exp}$ / ppm | $\rho_{ref}$ / ppm | $\rho_{calc}$ / ppm | [S1]  | [S2]               | [A-S2]       | $\rho$ calc | error  | $\Delta G$ / kJ/mol | beta |  |  |       |                      |                    |                            |         |         |              |        |          |        |        |        |        |        |            |           |         |         |         |       |       |  |           |         |    |   |  |  |
| 1                                                                                                                                                                                                                                                                                                                                                                                                                                                                                                                                                                              | 1                          | 0       | 600                  | 600   | 0       | 600              | 0                | 39.7670            | 18.4470            | 39.3000             | 11.07 | 0.00               | 0.000        | 39.3000     | 0.0000 |                     |      |  |  |       |                      |                    |                            |         |         |              |        |          |        |        |        |        |        |            |           |         |         |         |       |       |  |           |         |    |   |  |  |
| 2                                                                                                                                                                                                                                                                                                                                                                                                                                                                                                                                                                              | 0.9                        | 0.1     | 600                  | 540   | 60      | 40.4474          | 19.4473          | 39.3601            | 39.37              | 6.71                | 0.247 | 40.005             | 0.0005       |             |        |                     |      |  |  |       |                      |                    |                            |         |         |              |        |          |        |        |        |        |        |            |           |         |         |         |       |       |  |           |         |    |   |  |  |
| 3                                                                                                                                                                                                                                                                                                                                                                                                                                                                                                                                                                              | 0.8                        | 0.2     | 600                  | 480   | 120     | 41.0510          | 18.4460          | 40.5950            | 88.86              | 13.43               | 0.425 | 40.5245            | 0.0037       |             |        | $\Delta$ alpha 0    | 0.38 |  |  |       |                      |                    |                            |         |         |              |        |          |        |        |        |        |        |            |           |         |         |         |       |       |  |           |         |    |   |  |  |
| 4                                                                                                                                                                                                                                                                                                                                                                                                                                                                                                                                                                              | 0.7                        | 0.3     | 600                  | 420   | 180     | 41.3684          | 18.4532          | 40.8952            | 77.75              | 20.14               | 0.558 | 40.9350            | 0.0016       |             |        | $\Delta$ alpha 1    | 0.39 |  |  |       |                      |                    |                            |         |         |              |        |          |        |        |        |        |        |            |           |         |         |         |       |       |  |           |         |    |   |  |  |
| 5                                                                                                                                                                                                                                                                                                                                                                                                                                                                                                                                                                              | 0.6                        | 0.4     | 600                  | 360   | 240     | 41.7374          | 18.4493          | 41.2681            | 66.84              | 26.85               | 0.663 | 41.2699            | 0.0000       |             |        | $\Delta$ alpha 2    | 0.48 |  |  |       |                      |                    |                            |         |         |              |        |          |        |        |        |        |        |            |           |         |         |         |       |       |  |           |         |    |   |  |  |
| 6                                                                                                                                                                                                                                                                                                                                                                                                                                                                                                                                                                              | 0.5                        | 0.5     | 600                  | 300   | 300     | 42.0140          | 18.4476          | 41.5464            | 55.54              | 33.57               | 0.747 | 41.5016            | 0.0000       |             |        |                     | 0.3  |  |  |       |                      |                    |                            |         |         |              |        |          |        |        |        |        |        |            |           |         |         |         |       |       |  |           |         |    |   |  |  |
| 7                                                                                                                                                                                                                                                                                                                                                                                                                                                                                                                                                                              | 0.4                        | 0.6     | 600                  | 240   | 360     | 42.2369          | 18.4501          | 41.7858            | 44.43              | 40.29               | 0.836 | 41.7945            | 0.0008       |             |        |                     | 2.2  |  |  |       |                      |                    |                            |         |         |              |        |          |        |        |        |        |        |            |           |         |         |         |       |       |  |           |         |    |   |  |  |
| 8                                                                                                                                                                                                                                                                                                                                                                                                                                                                                                                                                                              | 0.3                        | 0.7     | 600                  | 180   | 420     | 42.5074          | 18.4577          | 42.0297            | 33.32              | 47.00               | 0.873 | 42.0082            | 0.0005       |             |        | a2-a1               | 0.4  |  |  |       |                      |                    |                            |         |         |              |        |          |        |        |        |        |        |            |           |         |         |         |       |       |  |           |         |    |   |  |  |
| 9                                                                                                                                                                                                                                                                                                                                                                                                                                                                                                                                                                              | 0.2                        | 0.8     | 600                  | 120   | 480     | 42.8322          | 18.4535          | 42.2187            | 22.21              | 53.71               | 0.922 | 42.1994            | 0.0004       |             |        |                     |      |  |  |       |                      |                    |                            |         |         |              |        |          |        |        |        |        |        |            |           |         |         |         |       |       |  |           |         |    |   |  |  |
| 10                                                                                                                                                                                                                                                                                                                                                                                                                                                                                                                                                                             | 0.1                        | 0.9     | 600                  | 60    | 540     | 42.8677          | 18.4478          | 42.3999            | 11.11              | 60.42               | 0.964 | 42.3728            | 0.0007       |             |        |                     |      |  |  |       |                      |                    |                            |         |         |              |        |          |        |        |        |        |        |            |           |         |         |         |       |       |  |           |         |    |   |  |  |
| 11                                                                                                                                                                                                                                                                                                                                                                                                                                                                                                                                                                             | 0                          | 1       | 600                  | 0     | 600     | 43.0186          | 18.4667          | 42.5319            | 0.00               | 67.14               | 1.000 | 42.5319            | 0.0000       |             |        |                     |      |  |  |       |                      |                    |                            |         |         |              |        |          |        |        |        |        |        |            |           |         |         |         |       |       |  |           |         |    |   |  |  |
| total vol of stock                                                                                                                                                                                                                                                                                                                                                                                                                                                                                                                                                             |                            |         |                      | 3300  | 3300    |                  |                  |                    |                    | 3.23                |       |                    | ss residuals |             | 0.0081 |                     |      |  |  |       |                      |                    |                            |         |         |              |        |          |        |        |        |        |        |            |           |         |         |         |       |       |  |           |         |    |   |  |  |
| <table border="1"> <thead> <tr> <th colspan="3"></th> <th colspan="2"><math>\rho</math>2 uncorrected</th> </tr> </thead> <tbody> <tr> <td><math>\rho</math></td> <td>39.3000</td> <td>42.5319</td> <td colspan="2">41.8746</td> </tr> <tr> <td>conc / M</td> <td>11.074</td> <td>67.136</td> <td colspan="2"></td> </tr> <tr> <td>FW</td> <td>84.16</td> <td>78.11</td> <td colspan="2"></td> </tr> <tr> <td>density</td> <td>0.779</td> <td>0.874</td> <td colspan="2"></td> </tr> <tr> <td>N sites</td> <td>12</td> <td>6</td> <td colspan="2"></td> </tr> </tbody> </table> |                            |         |                      |       |         |                  |                  |                    |                    |                     |       |                    |              |             |        |                     |      |  |  |       | $\rho$ 2 uncorrected |                    | $\rho$                     | 39.3000 | 42.5319 | 41.8746      |        | conc / M | 11.074 | 67.136 |        |        | FW     | 84.16      | 78.11     |         |         | density | 0.779 | 0.874 |  |           | N sites | 12 | 6 |  |  |
|                                                                                                                                                                                                                                                                                                                                                                                                                                                                                                                                                                                |                            |         | $\rho$ 2 uncorrected |       |         |                  |                  |                    |                    |                     |       |                    |              |             |        |                     |      |  |  |       |                      |                    |                            |         |         |              |        |          |        |        |        |        |        |            |           |         |         |         |       |       |  |           |         |    |   |  |  |
| $\rho$                                                                                                                                                                                                                                                                                                                                                                                                                                                                                                                                                                         | 39.3000                    | 42.5319 | 41.8746              |       |         |                  |                  |                    |                    |                     |       |                    |              |             |        |                     |      |  |  |       |                      |                    |                            |         |         |              |        |          |        |        |        |        |        |            |           |         |         |         |       |       |  |           |         |    |   |  |  |
| conc / M                                                                                                                                                                                                                                                                                                                                                                                                                                                                                                                                                                       | 11.074                     | 67.136  |                      |       |         |                  |                  |                    |                    |                     |       |                    |              |             |        |                     |      |  |  |       |                      |                    |                            |         |         |              |        |          |        |        |        |        |        |            |           |         |         |         |       |       |  |           |         |    |   |  |  |
| FW                                                                                                                                                                                                                                                                                                                                                                                                                                                                                                                                                                             | 84.16                      | 78.11   |                      |       |         |                  |                  |                    |                    |                     |       |                    |              |             |        |                     |      |  |  |       |                      |                    |                            |         |         |              |        |          |        |        |        |        |        |            |           |         |         |         |       |       |  |           |         |    |   |  |  |
| density                                                                                                                                                                                                                                                                                                                                                                                                                                                                                                                                                                        | 0.779                      | 0.874   |                      |       |         |                  |                  |                    |                    |                     |       |                    |              |             |        |                     |      |  |  |       |                      |                    |                            |         |         |              |        |          |        |        |        |        |        |            |           |         |         |         |       |       |  |           |         |    |   |  |  |
| N sites                                                                                                                                                                                                                                                                                                                                                                                                                                                                                                                                                                        | 12                         | 6       |                      |       |         |                  |                  |                    |                    |                     |       |                    |              |             |        |                     |      |  |  |       |                      |                    |                            |         |         |              |        |          |        |        |        |        |        |            |           |         |         |         |       |       |  |           |         |    |   |  |  |
| <table border="1"> <thead> <tr> <th colspan="2"></th> <th>C6H12</th> <th>Benzene</th> </tr> </thead> <tbody> <tr> <td>Phosphine Oxide</td> <td>weight / g</td> <td>0.0119</td> <td>0.0131</td> </tr> <tr> <td>FW</td> <td>218.32</td> <td>3.8680</td> <td>4.7773</td> </tr> <tr> <td>p</td> <td>97%</td> <td>4.9653</td> <td>5.4660</td> </tr> <tr> <td></td> <td>conc / mM</td> <td>10.6492</td> <td>10.6492</td> </tr> </tbody> </table>                                                                                                                                     |                            |         |                      |       |         |                  |                  |                    |                    |                     |       |                    |              |             |        |                     |      |  |  | C6H12 | Benzene              | Phosphine Oxide    | weight / g                 | 0.0119  | 0.0131  | FW           | 218.32 | 3.8680   | 4.7773 | p      | 97%    | 4.9653 | 5.4660 |            | conc / mM | 10.6492 | 10.6492 |         |       |       |  |           |         |    |   |  |  |
|                                                                                                                                                                                                                                                                                                                                                                                                                                                                                                                                                                                |                            | C6H12   | Benzene              |       |         |                  |                  |                    |                    |                     |       |                    |              |             |        |                     |      |  |  |       |                      |                    |                            |         |         |              |        |          |        |        |        |        |        |            |           |         |         |         |       |       |  |           |         |    |   |  |  |
| Phosphine Oxide                                                                                                                                                                                                                                                                                                                                                                                                                                                                                                                                                                | weight / g                 | 0.0119  | 0.0131               |       |         |                  |                  |                    |                    |                     |       |                    |              |             |        |                     |      |  |  |       |                      |                    |                            |         |         |              |        |          |        |        |        |        |        |            |           |         |         |         |       |       |  |           |         |    |   |  |  |
| FW                                                                                                                                                                                                                                                                                                                                                                                                                                                                                                                                                                             | 218.32                     | 3.8680  | 4.7773               |       |         |                  |                  |                    |                    |                     |       |                    |              |             |        |                     |      |  |  |       |                      |                    |                            |         |         |              |        |          |        |        |        |        |        |            |           |         |         |         |       |       |  |           |         |    |   |  |  |
| p                                                                                                                                                                                                                                                                                                                                                                                                                                                                                                                                                                              | 97%                        | 4.9653  | 5.4660               |       |         |                  |                  |                    |                    |                     |       |                    |              |             |        |                     |      |  |  |       |                      |                    |                            |         |         |              |        |          |        |        |        |        |        |            |           |         |         |         |       |       |  |           |         |    |   |  |  |
|                                                                                                                                                                                                                                                                                                                                                                                                                                                                                                                                                                                | conc / mM                  | 10.6492 | 10.6492              |       |         |                  |                  |                    |                    |                     |       |                    |              |             |        |                     |      |  |  |       |                      |                    |                            |         |         |              |        |          |        |        |        |        |        |            |           |         |         |         |       |       |  |           |         |    |   |  |  |
| <table border="1"> <thead> <tr> <th colspan="2"></th> <th>C6H12</th> <th>Benzene</th> </tr> </thead> <tbody> <tr> <td>External Reference</td> <td>Methylenediphosphonic acid</td> <td></td> <td></td> </tr> <tr> <td><math>\rho</math> / ppm</td> <td>17.98</td> <td></td> <td></td> </tr> <tr> <td>FW</td> <td>176.00</td> <td></td> <td></td> </tr> <tr> <td>weight / g</td> <td>0.0177</td> <td></td> <td></td> </tr> <tr> <td>V / mL</td> <td>2</td> <td></td> <td></td> </tr> <tr> <td>conc / mM</td> <td>50.28</td> <td></td> <td></td> </tr> </tbody> </table>          |                            |         |                      |       |         |                  |                  |                    |                    |                     |       |                    |              |             |        |                     |      |  |  | C6H12 | Benzene              | External Reference | Methylenediphosphonic acid |         |         | $\rho$ / ppm | 17.98  |          |        | FW     | 176.00 |        |        | weight / g | 0.0177    |         |         | V / mL  | 2     |       |  | conc / mM | 50.28   |    |   |  |  |
|                                                                                                                                                                                                                                                                                                                                                                                                                                                                                                                                                                                |                            | C6H12   | Benzene              |       |         |                  |                  |                    |                    |                     |       |                    |              |             |        |                     |      |  |  |       |                      |                    |                            |         |         |              |        |          |        |        |        |        |        |            |           |         |         |         |       |       |  |           |         |    |   |  |  |
| External Reference                                                                                                                                                                                                                                                                                                                                                                                                                                                                                                                                                             | Methylenediphosphonic acid |         |                      |       |         |                  |                  |                    |                    |                     |       |                    |              |             |        |                     |      |  |  |       |                      |                    |                            |         |         |              |        |          |        |        |        |        |        |            |           |         |         |         |       |       |  |           |         |    |   |  |  |
| $\rho$ / ppm                                                                                                                                                                                                                                                                                                                                                                                                                                                                                                                                                                   | 17.98                      |         |                      |       |         |                  |                  |                    |                    |                     |       |                    |              |             |        |                     |      |  |  |       |                      |                    |                            |         |         |              |        |          |        |        |        |        |        |            |           |         |         |         |       |       |  |           |         |    |   |  |  |
| FW                                                                                                                                                                                                                                                                                                                                                                                                                                                                                                                                                                             | 176.00                     |         |                      |       |         |                  |                  |                    |                    |                     |       |                    |              |             |        |                     |      |  |  |       |                      |                    |                            |         |         |              |        |          |        |        |        |        |        |            |           |         |         |         |       |       |  |           |         |    |   |  |  |
| weight / g                                                                                                                                                                                                                                                                                                                                                                                                                                                                                                                                                                     | 0.0177                     |         |                      |       |         |                  |                  |                    |                    |                     |       |                    |              |             |        |                     |      |  |  |       |                      |                    |                            |         |         |              |        |          |        |        |        |        |        |            |           |         |         |         |       |       |  |           |         |    |   |  |  |
| V / mL                                                                                                                                                                                                                                                                                                                                                                                                                                                                                                                                                                         | 2                          |         |                      |       |         |                  |                  |                    |                    |                     |       |                    |              |             |        |                     |      |  |  |       |                      |                    |                            |         |         |              |        |          |        |        |        |        |        |            |           |         |         |         |       |       |  |           |         |    |   |  |  |
| conc / mM                                                                                                                                                                                                                                                                                                                                                                                                                                                                                                                                                                      | 50.28                      |         |                      |       |         |                  |                  |                    |                    |                     |       |                    |              |             |        |                     |      |  |  |       |                      |                    |                            |         |         |              |        |          |        |        |        |        |        |            |           |         |         |         |       |       |  |           |         |    |   |  |  |

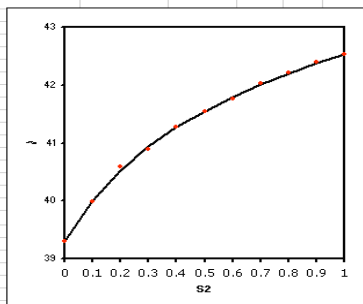

|                                                                                                                                                                                                                                                                                                                                                                                                                                                                                                                                                                                |                            |         |                      |       |         |                  |                  |                    |                    |                     |       | $\Delta\rho$ / ppm | Kb2 / M-1    | error       |        |                     |      |  |  |       |                      |                    |                            |         |         |              |        |          |        |        |        |        |        |            |           |         |         |         |       |       |  |           |         |    |   |  |  |
|--------------------------------------------------------------------------------------------------------------------------------------------------------------------------------------------------------------------------------------------------------------------------------------------------------------------------------------------------------------------------------------------------------------------------------------------------------------------------------------------------------------------------------------------------------------------------------|----------------------------|---------|----------------------|-------|---------|------------------|------------------|--------------------|--------------------|---------------------|-------|--------------------|--------------|-------------|--------|---------------------|------|--|--|-------|----------------------|--------------------|----------------------------|---------|---------|--------------|--------|----------|--------|--------|--------|--------|--------|------------|-----------|---------|---------|---------|-------|-------|--|-----------|---------|----|---|--|--|
|                                                                                                                                                                                                                                                                                                                                                                                                                                                                                                                                                                                |                            |         |                      |       |         |                  |                  |                    |                    |                     |       | 0.6301             | 4.35E+00     | 0.0052      |        |                     |      |  |  |       |                      |                    |                            |         |         |              |        |          |        |        |        |        |        |            |           |         |         |         |       |       |  |           |         |    |   |  |  |
| Expt                                                                                                                                                                                                                                                                                                                                                                                                                                                                                                                                                                           | C6H12                      | Benzene | vol total / $\mu$ l  | C6H12 | Benzene | vol S1 / $\mu$ l | vol S2 / $\mu$ l | $\rho_{exp}$ / ppm | $\rho_{ref}$ / ppm | $\rho_{calc}$ / ppm | [S1]  | [S2]               | [A-S2]       | $\rho$ calc | error  | $\Delta G$ / kJ/mol | beta |  |  |       |                      |                    |                            |         |         |              |        |          |        |        |        |        |        |            |           |         |         |         |       |       |  |           |         |    |   |  |  |
| 1                                                                                                                                                                                                                                                                                                                                                                                                                                                                                                                                                                              | 1                          | 0       | 600                  | 600   | 0       | 600              | 0                | 39.5675            | 18.2762            | 39.2713             | 11.07 | 0.00               | 0.000        | 39.2713     | 0.0000 |                     |      |  |  |       |                      |                    |                            |         |         |              |        |          |        |        |        |        |        |            |           |         |         |         |       |       |  |           |         |    |   |  |  |
| 2                                                                                                                                                                                                                                                                                                                                                                                                                                                                                                                                                                              | 0.9                        | 0.1     | 600                  | 540   | 60      | 40.4108          | 18.4523          | 39.9385            | 99.97              | 6.71                | 0.226 | 39.9405            | 0.0000       |             |        |                     |      |  |  |       |                      |                    |                            |         |         |              |        |          |        |        |        |        |        |            |           |         |         |         |       |       |  |           |         |    |   |  |  |
| 3                                                                                                                                                                                                                                                                                                                                                                                                                                                                                                                                                                              | 0.8                        | 0.2     | 600                  | 480   | 120     | 40.9251          | 18.4527          | 40.4524            | 88.86              | 13.43               | 0.397 | 40.4609            | 0.0001       |             |        | $\Delta$ alpha 0    | 0.35 |  |  |       |                      |                    |                            |         |         |              |        |          |        |        |        |        |        |            |           |         |         |         |       |       |  |           |         |    |   |  |  |
| 4                                                                                                                                                                                                                                                                                                                                                                                                                                                                                                                                                                              | 0.7                        | 0.3     | 600                  | 420   | 180     | 41.3678          | 18.4570          | 40.8908            | 77.75              | 20.14               | 0.530 | 40.8811            | 0.0001       |             |        | $\Delta$ alpha 1    | 0.36 |  |  |       |                      |                    |                            |         |         |              |        |          |        |        |        |        |        |            |           |         |         |         |       |       |  |           |         |    |   |  |  |
| 5                                                                                                                                                                                                                                                                                                                                                                                                                                                                                                                                                                              | 0.6                        | 0.4     | 600                  | 360   | 240     | 41.7124          | 18.4556          | 41.2368            | 66.84              | 26.85               | 0.637 | 41.2310            | 0.0000       |             |        | $\Delta$ alpha 2    | 0.45 |  |  |       |                      |                    |                            |         |         |              |        |          |        |        |        |        |        |            |           |         |         |         |       |       |  |           |         |    |   |  |  |
| 6                                                                                                                                                                                                                                                                                                                                                                                                                                                                                                                                                                              | 0.5                        | 0.5     | 600                  | 300   | 300     | 42.0064          | 18.4581          | 41.5293            | 55.54              | 33.57               | 0.724 | 41.5293            | 0.0000       |             |        |                     | 0.3  |  |  |       |                      |                    |                            |         |         |              |        |          |        |        |        |        |        |            |           |         |         |         |       |       |  |           |         |    |   |  |  |
| 7                                                                                                                                                                                                                                                                                                                                                                                                                                                                                                                                                                              | 0.4                        | 0.6     | 600                  | 240   | 360     | 42.2642          | 18.4585          | 41.7857            | 44.43              | 40.28               | 0.798 | 41.7889            | 0.0000       |             |        |                     | 2.2  |  |  |       |                      |                    |                            |         |         |              |        |          |        |        |        |        |        |            |           |         |         |         |       |       |  |           |         |    |   |  |  |
| 8                                                                                                                                                                                                                                                                                                                                                                                                                                                                                                                                                                              | 0.3                        | 0.7     | 600                  | 180   | 420     | 42.4130          | 18.3823          | 42.0107            | 33.32              | 47.00               | 0.860 | 42.0185            | 0.0001       |             |        | a2-a1               | 0.4  |  |  |       |                      |                    |                            |         |         |              |        |          |        |        |        |        |        |            |           |         |         |         |       |       |  |           |         |    |   |  |  |
| 9                                                                                                                                                                                                                                                                                                                                                                                                                                                                                                                                                                              | 0.2                        | 0.8     | 600                  | 120   | 480     | 42.7058          | 18.4599          | 42.2259            | 22.21              | 53.71               | 0.913 | 42.2246            | 0.0000       |             |        |                     |      |  |  |       |                      |                    |                            |         |         |              |        |          |        |        |        |        |        |            |           |         |         |         |       |       |  |           |         |    |   |  |  |
| 10                                                                                                                                                                                                                                                                                                                                                                                                                                                                                                                                                                             | 0.1                        | 0.9     | 600                  | 60    | 540     | 42.8526          | 18.4561          | 42.4185            | 11.11              | 60.42               | 0.959 | 42.4118            | 0.0000       |             |        |                     |      |  |  |       |                      |                    |                            |         |         |              |        |          |        |        |        |        |        |            |           |         |         |         |       |       |  |           |         |    |   |  |  |
| 11                                                                                                                                                                                                                                                                                                                                                                                                                                                                                                                                                                             | 0                          | 1       | 600                  | 0     | 600     | 43.0839          | 18.4603          | 42.5639            | 0.00               | 67.14               | 1.000 | 42.5636            | 0.0000       |             |        |                     |      |  |  |       |                      |                    |                            |         |         |              |        |          |        |        |        |        |        |            |           |         |         |         |       |       |  |           |         |    |   |  |  |
| total vol of stock                                                                                                                                                                                                                                                                                                                                                                                                                                                                                                                                                             |                            |         |                      | 3300  | 3300    |                  |                  |                    |                    | 3.31                |       |                    | ss residuals |             | 0.0003 |                     |      |  |  |       |                      |                    |                            |         |         |              |        |          |        |        |        |        |        |            |           |         |         |         |       |       |  |           |         |    |   |  |  |
| <table border="1"> <thead> <tr> <th colspan="3"></th> <th colspan="2"><math>\rho</math>2 uncorrected</th> </tr> </thead> <tbody> <tr> <td><math>\rho</math></td> <td>39.2713</td> <td>42.5319</td> <td colspan="2">41.9536</td> </tr> <tr> <td>conc / M</td> <td>11.074</td> <td>67.136</td> <td colspan="2"></td> </tr> <tr> <td>FW</td> <td>84.16</td> <td>78.11</td> <td colspan="2"></td> </tr> <tr> <td>density</td> <td>0.779</td> <td>0.874</td> <td colspan="2"></td> </tr> <tr> <td>N sites</td> <td>12</td> <td>6</td> <td colspan="2"></td> </tr> </tbody> </table> |                            |         |                      |       |         |                  |                  |                    |                    |                     |       |                    |              |             |        |                     |      |  |  |       | $\rho$ 2 uncorrected |                    | $\rho$                     | 39.2713 | 42.5319 | 41.9536      |        | conc / M | 11.074 | 67.136 |        |        | FW     | 84.16      | 78.11     |         |         | density | 0.779 | 0.874 |  |           | N sites | 12 | 6 |  |  |
|                                                                                                                                                                                                                                                                                                                                                                                                                                                                                                                                                                                |                            |         | $\rho$ 2 uncorrected |       |         |                  |                  |                    |                    |                     |       |                    |              |             |        |                     |      |  |  |       |                      |                    |                            |         |         |              |        |          |        |        |        |        |        |            |           |         |         |         |       |       |  |           |         |    |   |  |  |
| $\rho$                                                                                                                                                                                                                                                                                                                                                                                                                                                                                                                                                                         | 39.2713                    | 42.5319 | 41.9536              |       |         |                  |                  |                    |                    |                     |       |                    |              |             |        |                     |      |  |  |       |                      |                    |                            |         |         |              |        |          |        |        |        |        |        |            |           |         |         |         |       |       |  |           |         |    |   |  |  |
| conc / M                                                                                                                                                                                                                                                                                                                                                                                                                                                                                                                                                                       | 11.074                     | 67.136  |                      |       |         |                  |                  |                    |                    |                     |       |                    |              |             |        |                     |      |  |  |       |                      |                    |                            |         |         |              |        |          |        |        |        |        |        |            |           |         |         |         |       |       |  |           |         |    |   |  |  |
| FW                                                                                                                                                                                                                                                                                                                                                                                                                                                                                                                                                                             | 84.16                      | 78.11   |                      |       |         |                  |                  |                    |                    |                     |       |                    |              |             |        |                     |      |  |  |       |                      |                    |                            |         |         |              |        |          |        |        |        |        |        |            |           |         |         |         |       |       |  |           |         |    |   |  |  |
| density                                                                                                                                                                                                                                                                                                                                                                                                                                                                                                                                                                        | 0.779                      | 0.874   |                      |       |         |                  |                  |                    |                    |                     |       |                    |              |             |        |                     |      |  |  |       |                      |                    |                            |         |         |              |        |          |        |        |        |        |        |            |           |         |         |         |       |       |  |           |         |    |   |  |  |
| N sites                                                                                                                                                                                                                                                                                                                                                                                                                                                                                                                                                                        | 12                         | 6       |                      |       |         |                  |                  |                    |                    |                     |       |                    |              |             |        |                     |      |  |  |       |                      |                    |                            |         |         |              |        |          |        |        |        |        |        |            |           |         |         |         |       |       |  |           |         |    |   |  |  |
| <table border="1"> <thead> <tr> <th colspan="2"></th> <th>C6H12</th> <th>Benzene</th> </tr> </thead> <tbody> <tr> <td>Phosphine Oxide</td> <td>weight / g</td> <td>0.0119</td> <td>0.0112</td> </tr> <tr> <td>FW</td> <td>218.32</td> <td>3.8680</td> <td>4.0844</td> </tr> <tr> <td>p</td> <td>97%</td> <td>4.9653</td> <td>4.6733</td> </tr> <tr> <td></td> <td>conc / mM</td> <td>10.6492</td> <td>10.6492</td> </tr> </tbody> </table>                                                                                                                                     |                            |         |                      |       |         |                  |                  |                    |                    |                     |       |                    |              |             |        |                     |      |  |  | C6H12 | Benzene              | Phosphine Oxide    | weight / g                 | 0.0119  | 0.0112  | FW           | 218.32 | 3.8680   | 4.0844 | p      | 97%    | 4.9653 | 4.6733 |            | conc / mM | 10.6492 | 10.6492 |         |       |       |  |           |         |    |   |  |  |
|                                                                                                                                                                                                                                                                                                                                                                                                                                                                                                                                                                                |                            | C6H12   | Benzene              |       |         |                  |                  |                    |                    |                     |       |                    |              |             |        |                     |      |  |  |       |                      |                    |                            |         |         |              |        |          |        |        |        |        |        |            |           |         |         |         |       |       |  |           |         |    |   |  |  |
| Phosphine Oxide                                                                                                                                                                                                                                                                                                                                                                                                                                                                                                                                                                | weight / g                 | 0.0119  | 0.0112               |       |         |                  |                  |                    |                    |                     |       |                    |              |             |        |                     |      |  |  |       |                      |                    |                            |         |         |              |        |          |        |        |        |        |        |            |           |         |         |         |       |       |  |           |         |    |   |  |  |
| FW                                                                                                                                                                                                                                                                                                                                                                                                                                                                                                                                                                             | 218.32                     | 3.8680  | 4.0844               |       |         |                  |                  |                    |                    |                     |       |                    |              |             |        |                     |      |  |  |       |                      |                    |                            |         |         |              |        |          |        |        |        |        |        |            |           |         |         |         |       |       |  |           |         |    |   |  |  |
| p                                                                                                                                                                                                                                                                                                                                                                                                                                                                                                                                                                              | 97%                        | 4.9653  | 4.6733               |       |         |                  |                  |                    |                    |                     |       |                    |              |             |        |                     |      |  |  |       |                      |                    |                            |         |         |              |        |          |        |        |        |        |        |            |           |         |         |         |       |       |  |           |         |    |   |  |  |
|                                                                                                                                                                                                                                                                                                                                                                                                                                                                                                                                                                                | conc / mM                  | 10.6492 | 10.6492              |       |         |                  |                  |                    |                    |                     |       |                    |              |             |        |                     |      |  |  |       |                      |                    |                            |         |         |              |        |          |        |        |        |        |        |            |           |         |         |         |       |       |  |           |         |    |   |  |  |
| <table border="1"> <thead> <tr> <th colspan="2"></th> <th>C6H12</th> <th>Benzene</th> </tr> </thead> <tbody> <tr> <td>External Reference</td> <td>Methylenediphosphonic acid</td> <td></td> <td></td> </tr> <tr> <td><math>\rho</math> / ppm</td> <td>17.98</td> <td></td> <td></td> </tr> <tr> <td>FW</td> <td>176.00</td> <td></td> <td></td> </tr> <tr> <td>weight / g</td> <td>0.0177</td> <td></td> <td></td> </tr> <tr> <td>V / mL</td> <td>2</td> <td></td> <td></td> </tr> <tr> <td>conc / mM</td> <td>50.28</td> <td></td> <td></td> </tr> </tbody> </table>          |                            |         |                      |       |         |                  |                  |                    |                    |                     |       |                    |              |             |        |                     |      |  |  | C6H12 | Benzene              | External Reference | Methylenediphosphonic acid |         |         | $\rho$ / ppm | 17.98  |          |        | FW     | 176.00 |        |        | weight / g | 0.0177    |         |         | V / mL  | 2     |       |  | conc / mM | 50.28   |    |   |  |  |
|                                                                                                                                                                                                                                                                                                                                                                                                                                                                                                                                                                                |                            | C6H12   | Benzene              |       |         |                  |                  |                    |                    |                     |       |                    |              |             |        |                     |      |  |  |       |                      |                    |                            |         |         |              |        |          |        |        |        |        |        |            |           |         |         |         |       |       |  |           |         |    |   |  |  |
| External Reference                                                                                                                                                                                                                                                                                                                                                                                                                                                                                                                                                             | Methylenediphosphonic acid |         |                      |       |         |                  |                  |                    |                    |                     |       |                    |              |             |        |                     |      |  |  |       |                      |                    |                            |         |         |              |        |          |        |        |        |        |        |            |           |         |         |         |       |       |  |           |         |    |   |  |  |
| $\rho$ / ppm                                                                                                                                                                                                                                                                                                                                                                                                                                                                                                                                                                   | 17.98                      |         |                      |       |         |                  |                  |                    |                    |                     |       |                    |              |             |        |                     |      |  |  |       |                      |                    |                            |         |         |              |        |          |        |        |        |        |        |            |           |         |         |         |       |       |  |           |         |    |   |  |  |
| FW                                                                                                                                                                                                                                                                                                                                                                                                                                                                                                                                                                             | 176.00                     |         |                      |       |         |                  |                  |                    |                    |                     |       |                    |              |             |        |                     |      |  |  |       |                      |                    |                            |         |         |              |        |          |        |        |        |        |        |            |           |         |         |         |       |       |  |           |         |    |   |  |  |
| weight / g                                                                                                                                                                                                                                                                                                                                                                                                                                                                                                                                                                     | 0.0177                     |         |                      |       |         |                  |                  |                    |                    |                     |       |                    |              |             |        |                     |      |  |  |       |                      |                    |                            |         |         |              |        |          |        |        |        |        |        |            |           |         |         |         |       |       |  |           |         |    |   |  |  |
| V / mL                                                                                                                                                                                                                                                                                                                                                                                                                                                                                                                                                                         | 2                          |         |                      |       |         |                  |                  |                    |                    |                     |       |                    |              |             |        |                     |      |  |  |       |                      |                    |                            |         |         |              |        |          |        |        |        |        |        |            |           |         |         |         |       |       |  |           |         |    |   |  |  |
| conc / mM                                                                                                                                                                                                                                                                                                                                                                                                                                                                                                                                                                      | 50.28                      |         |                      |       |         |                  |                  |                    |                    |                     |       |                    |              |             |        |                     |      |  |  |       |                      |                    |                            |         |         |              |        |          |        |        |        |        |        |            |           |         |         |         |       |       |  |           |         |    |   |  |  |

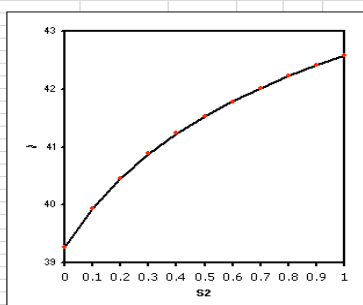

## 2.10. Cyclohexane-Carbon tetrachloride

| Expt                                          | C6H12 |     | CCl4             |                  | vol total / $\mu$ l | C6H12                |                      | CCl4                 |        | $\delta_{exp}$ / ppm | $\delta_{ref}$ / ppm | $\delta_{exp}$ / ppm | [S1]   | [S2] | [A-S2] | $\rho$ calc | $\rho$ error | $\Delta G$ / kJ/mol | Kb2 / M-1 | error |      |
|-----------------------------------------------|-------|-----|------------------|------------------|---------------------|----------------------|----------------------|----------------------|--------|----------------------|----------------------|----------------------|--------|------|--------|-------------|--------------|---------------------|-----------|-------|------|
|                                               | S1    | S2  | vol S1 / $\mu$ l | vol S2 / $\mu$ l |                     | $\delta_{exp}$ / ppm | $\delta_{ref}$ / ppm | $\delta_{exp}$ / ppm | [S1]   |                      |                      |                      |        |      |        |             |              |                     |           |       | [S2] |
| 1                                             | 1     | 0   | 600              | 600              | 0                   | 39.9366              | 18.4441              | 39.4725              | 111.07 | 0.00                 | 0.000                | 39.4725              | 0.0000 |      |        |             |              |                     |           |       |      |
| 2                                             | 0.9   | 0.1 | 600              | 540              | 60                  | 40.8427              | 18.4452              | 40.1785              | 99.97  | 4.15                 | 0.237                | 40.1723              | 0.0000 |      |        |             |              |                     |           |       |      |
| 3                                             | 0.8   | 0.2 | 600              | 480              | 120                 | 41.1272              | 18.4482              | 40.6590              | 88.86  | 8.29                 | 0.487                | 40.6641              | 0.0000 |      |        |             |              |                     |           |       |      |
| 4                                             | 0.7   | 0.3 | 600              | 420              | 180                 | 41.5051              | 18.4483              | 41.0368              | 77.75  | 12.44                | 0.620                | 41.0429              | 0.0000 |      |        |             |              |                     |           |       |      |
| 5                                             | 0.6   | 0.4 | 600              | 360              | 240                 | 41.8260              | 18.4517              | 41.3543              | 66.84  | 16.58                | 0.717                | 41.3534              | 0.0000 |      |        |             |              |                     |           |       |      |
| 6                                             | 0.5   | 0.5 | 600              | 300              | 300                 | 42.1066              | 18.4505              | 41.8351              | 55.54  | 20.73                | 0.792                | 41.8195              | 0.0002 |      |        |             |              |                     |           |       |      |
| 7                                             | 0.4   | 0.6 | 600              | 240              | 360                 | 42.3416              | 18.4745              | 41.9471              | 44.43  | 24.57                | 0.851                | 41.9552              | 0.0001 |      |        |             |              |                     |           |       |      |
| 8                                             | 0.3   | 0.7 | 600              | 180              | 420                 | 42.5682              | 18.4524              | 42.0958              | 33.32  | 29.02                | 0.899                | 42.0691              | 0.0007 |      |        |             |              |                     |           |       |      |
| 9                                             | 0.2   | 0.8 | 600              | 120              | 480                 | 42.7090              | 18.4659              | 42.2231              | 22.21  | 33.16                | 0.938                | 42.2668              | 0.0019 |      |        |             |              |                     |           |       |      |
| 10                                            | 0.1   | 0.9 | 600              | 60               | 540                 | 42.9372              | 18.4575              | 42.4597              | 11.11  | 37.31                | 0.972                | 42.4523              | 0.0001 |      |        |             |              |                     |           |       |      |
| 11                                            | 0     | 1   | 600              | 0                | 600                 | 43.0981              | 18.4500              | 42.6201              | 0.00   | 41.45                | 1.000                | 42.6201              | 0.0000 |      |        |             |              |                     |           |       |      |
| total vol of stock                            |       |     |                  |                  |                     | 3300                 | 3300                 |                      |        |                      |                      |                      |        |      |        |             |              |                     |           |       |      |
| $\rho$ 2 uncorrected                          |       |     |                  |                  |                     |                      |                      |                      |        |                      |                      |                      |        |      |        |             |              |                     |           |       |      |
| $\rho$ 39.4725 42.6281 41.4243                |       |     |                  |                  |                     |                      |                      |                      |        |                      |                      |                      |        |      |        |             |              |                     |           |       |      |
| conc / M 111.074 41.451                       |       |     |                  |                  |                     |                      |                      |                      |        |                      |                      |                      |        |      |        |             |              |                     |           |       |      |
| FW 84.16 153.82                               |       |     |                  |                  |                     |                      |                      |                      |        |                      |                      |                      |        |      |        |             |              |                     |           |       |      |
| density 0.779 1.534                           |       |     |                  |                  |                     |                      |                      |                      |        |                      |                      |                      |        |      |        |             |              |                     |           |       |      |
| N sites 12 4                                  |       |     |                  |                  |                     |                      |                      |                      |        |                      |                      |                      |        |      |        |             |              |                     |           |       |      |
| <b>Phosphine Oxide</b>                        |       |     |                  |                  |                     |                      |                      |                      |        |                      |                      |                      |        |      |        |             |              |                     |           |       |      |
| weight / g C6H12 CCl4                         |       |     |                  |                  |                     |                      |                      |                      |        |                      |                      |                      |        |      |        |             |              |                     |           |       |      |
| FW 218.32 0.0111 0.0111                       |       |     |                  |                  |                     |                      |                      |                      |        |                      |                      |                      |        |      |        |             |              |                     |           |       |      |
| p 97% weight solvent / g 3.8740 7.9270 8.2222 |       |     |                  |                  |                     |                      |                      |                      |        |                      |                      |                      |        |      |        |             |              |                     |           |       |      |
| V solvent / mL 4.9730 4.9730                  |       |     |                  |                  |                     |                      |                      |                      |        |                      |                      |                      |        |      |        |             |              |                     |           |       |      |
| conc / mM 9.9170 9.9170 9.561                 |       |     |                  |                  |                     |                      |                      |                      |        |                      |                      |                      |        |      |        |             |              |                     |           |       |      |
| <b>External Reference</b>                     |       |     |                  |                  |                     |                      |                      |                      |        |                      |                      |                      |        |      |        |             |              |                     |           |       |      |
| Methylenediphosphonic acid                    |       |     |                  |                  |                     |                      |                      |                      |        |                      |                      |                      |        |      |        |             |              |                     |           |       |      |
| M <sub>d</sub> / ppm 17.98                    |       |     |                  |                  |                     |                      |                      |                      |        |                      |                      |                      |        |      |        |             |              |                     |           |       |      |
| FW 176.00                                     |       |     |                  |                  |                     |                      |                      |                      |        |                      |                      |                      |        |      |        |             |              |                     |           |       |      |
| weight / g 0.0177                             |       |     |                  |                  |                     |                      |                      |                      |        |                      |                      |                      |        |      |        |             |              |                     |           |       |      |
| V / mL 2                                      |       |     |                  |                  |                     |                      |                      |                      |        |                      |                      |                      |        |      |        |             |              |                     |           |       |      |
| conc / mM 50.28                               |       |     |                  |                  |                     |                      |                      |                      |        |                      |                      |                      |        |      |        |             |              |                     |           |       |      |

  

| Expt                                          | C6H12 |     | CCl4             |                  | vol total / $\mu$ l | C6H12                |                      | CCl4                 |        | $\delta_{exp}$ / ppm | $\delta_{ref}$ / ppm | $\delta_{exp}$ / ppm | [S1]   | [S2] | [A-S2] | $\rho$ calc | $\rho$ error | $\Delta G$ / kJ/mol | Kb2 / M-1 | error |      |
|-----------------------------------------------|-------|-----|------------------|------------------|---------------------|----------------------|----------------------|----------------------|--------|----------------------|----------------------|----------------------|--------|------|--------|-------------|--------------|---------------------|-----------|-------|------|
|                                               | S1    | S2  | vol S1 / $\mu$ l | vol S2 / $\mu$ l |                     | $\delta_{exp}$ / ppm | $\delta_{ref}$ / ppm | $\delta_{exp}$ / ppm | [S1]   |                      |                      |                      |        |      |        |             |              |                     |           |       | [S2] |
| 1                                             | 1     | 0   | 600              | 600              | 0                   | 39.9366              | 18.4478              | 39.5276              | 111.07 | 0.00                 | 0.000                | 39.5276              | 0.0000 |      |        |             |              |                     |           |       |      |
| 2                                             | 0.9   | 0.1 | 600              | 540              | 60                  | 40.6163              | 18.4482              | 40.1481              | 99.97  | 4.15                 | 0.211                | 40.1063              | 0.0017 |      |        |             |              |                     |           |       |      |
| 3                                             | 0.8   | 0.2 | 600              | 480              | 120                 | 41.0374              | 18.4511              | 40.5863              | 88.86  | 8.29                 | 0.375                | 40.5647              | 0.0009 |      |        |             |              |                     |           |       |      |
| 4                                             | 0.7   | 0.3 | 600              | 420              | 180                 | 41.3867              | 18.4582              | 40.9085              | 77.75  | 12.44                | 0.507                | 40.9384              | 0.0009 |      |        |             |              |                     |           |       |      |
| 5                                             | 0.6   | 0.4 | 600              | 360              | 240                 | 41.7200              | 18.4508              | 41.2432              | 66.84  | 16.58                | 0.615                | 41.2501              | 0.0000 |      |        |             |              |                     |           |       |      |
| 6                                             | 0.5   | 0.5 | 600              | 300              | 300                 | 41.9691              | 18.4524              | 41.4957              | 55.54  | 20.73                | 0.706                | 41.9562              | 0.0004 |      |        |             |              |                     |           |       |      |
| 7                                             | 0.4   | 0.6 | 600              | 240              | 360                 | 42.2183              | 18.4540              | 41.7443              | 44.43  | 24.57                | 0.783                | 41.7443              | 0.0000 |      |        |             |              |                     |           |       |      |
| 8                                             | 0.3   | 0.7 | 600              | 180              | 420                 | 42.4366              | 18.4637              | 41.9529              | 33.32  | 29.02                | 0.849                | 41.9451              | 0.0001 |      |        |             |              |                     |           |       |      |
| 9                                             | 0.2   | 0.8 | 600              | 120              | 480                 | 42.6218              | 18.4569              | 42.1449              | 22.21  | 33.16                | 0.906                | 42.1232              | 0.0005 |      |        |             |              |                     |           |       |      |
| 10                                            | 0.1   | 0.9 | 600              | 60               | 540                 | 42.7903              | 18.4510              | 42.2192              | 11.11  | 37.31                | 0.956                | 42.2627              | 0.0013 |      |        |             |              |                     |           |       |      |
| 11                                            | 0     | 1   | 600              | 0                | 600                 | 42.9273              | 18.4603              | 42.4270              | 0.00   | 41.45                | 1.000                | 42.4270              | 0.0000 |      |        |             |              |                     |           |       |      |
| total vol of stock                            |       |     |                  |                  |                     | 3300                 | 3300                 |                      |        |                      |                      |                      |        |      |        |             |              |                     |           |       |      |
| $\rho$ 2 uncorrected                          |       |     |                  |                  |                     |                      |                      |                      |        |                      |                      |                      |        |      |        |             |              |                     |           |       |      |
| $\rho$ 39.5276 42.4270 42.1399                |       |     |                  |                  |                     |                      |                      |                      |        |                      |                      |                      |        |      |        |             |              |                     |           |       |      |
| conc / M 111.074 41.451                       |       |     |                  |                  |                     |                      |                      |                      |        |                      |                      |                      |        |      |        |             |              |                     |           |       |      |
| FW 84.16 153.82                               |       |     |                  |                  |                     |                      |                      |                      |        |                      |                      |                      |        |      |        |             |              |                     |           |       |      |
| density 0.779 1.534                           |       |     |                  |                  |                     |                      |                      |                      |        |                      |                      |                      |        |      |        |             |              |                     |           |       |      |
| N sites 12 4                                  |       |     |                  |                  |                     |                      |                      |                      |        |                      |                      |                      |        |      |        |             |              |                     |           |       |      |
| <b>Phosphine Oxide</b>                        |       |     |                  |                  |                     |                      |                      |                      |        |                      |                      |                      |        |      |        |             |              |                     |           |       |      |
| weight / g C6H12 CCl4                         |       |     |                  |                  |                     |                      |                      |                      |        |                      |                      |                      |        |      |        |             |              |                     |           |       |      |
| FW 218.32 0.0111 0.0117                       |       |     |                  |                  |                     |                      |                      |                      |        |                      |                      |                      |        |      |        |             |              |                     |           |       |      |
| p 97% weight solvent / g 3.8740 8.3555 8.2222 |       |     |                  |                  |                     |                      |                      |                      |        |                      |                      |                      |        |      |        |             |              |                     |           |       |      |
| V solvent / mL 4.9730 5.2419                  |       |     |                  |                  |                     |                      |                      |                      |        |                      |                      |                      |        |      |        |             |              |                     |           |       |      |
| conc / mM 9.9170 9.9170 9.561                 |       |     |                  |                  |                     |                      |                      |                      |        |                      |                      |                      |        |      |        |             |              |                     |           |       |      |
| <b>External Reference</b>                     |       |     |                  |                  |                     |                      |                      |                      |        |                      |                      |                      |        |      |        |             |              |                     |           |       |      |
| Methylenediphosphonic acid                    |       |     |                  |                  |                     |                      |                      |                      |        |                      |                      |                      |        |      |        |             |              |                     |           |       |      |
| M <sub>d</sub> / ppm 17.98                    |       |     |                  |                  |                     |                      |                      |                      |        |                      |                      |                      |        |      |        |             |              |                     |           |       |      |
| FW 176.00                                     |       |     |                  |                  |                     |                      |                      |                      |        |                      |                      |                      |        |      |        |             |              |                     |           |       |      |
| weight / g 0.0177                             |       |     |                  |                  |                     |                      |                      |                      |        |                      |                      |                      |        |      |        |             |              |                     |           |       |      |
| V / mL 2                                      |       |     |                  |                  |                     |                      |                      |                      |        |                      |                      |                      |        |      |        |             |              |                     |           |       |      |
| conc / mM 50.28                               |       |     |                  |                  |                     |                      |                      |                      |        |                      |                      |                      |        |      |        |             |              |                     |           |       |      |

## 2.11. Cyclohexane-Chloroform

| Expt                       | C6H12   |         | CHCl3              |                  | vol total / $\mu$ l | C6H12            |                  | CHCl3   |          | $\rho_{exp}$ / ppm | $\rho_{ref}$ / ppm | $\rho_{exp}$ / ppm | [S1]    | [S2]   | [A-S2]       | $\rho$ calc | error | $\Delta G$ / kJ/mol | Kb2 / M-1 | error |        |
|----------------------------|---------|---------|--------------------|------------------|---------------------|------------------|------------------|---------|----------|--------------------|--------------------|--------------------|---------|--------|--------------|-------------|-------|---------------------|-----------|-------|--------|
|                            | S1      | S2      | vol S1 / $\mu$ l   | vol S2 / $\mu$ l |                     | vol S1 / $\mu$ l | vol S2 / $\mu$ l | 1.2021  | 2.50E-02 |                    |                    |                    |         |        |              |             |       |                     |           |       | 0.0382 |
| 1                          | 1       | 0       | 600                | 0                | 600                 | 0                | 39.6722          | 18.4441 | 39.2081  | 11.07              | 0.00               | 0.000              | 39.2081 | 0.0000 |              |             |       |                     |           |       |        |
| 2                          | 0.9     | 0.1     | 600                | 60               | 660                 | 540              | 45.3679          | 18.4424 | 45.5045  | 39.37              | 1.25               | 0.758              | 45.4608 | 0.0019 |              |             |       |                     |           |       |        |
| 3                          | 0.8     | 0.2     | 600                | 120              | 720                 | 480              | 46.9377          | 18.4453 | 46.4724  | 88.86              | 2.50               | 0.876              | 46.5353 | 0.0040 |              |             |       |                     |           |       |        |
| 4                          | 0.7     | 0.3     | 600                | 180              | 780                 | 420              | 47.4643          | 18.4525 | 46.9918  | 77.75              | 3.75               | 0.923              | 47.0432 | 0.0026 |              |             |       |                     |           |       |        |
| 5                          | 0.6     | 0.4     | 600                | 240              | 840                 | 360              | 47.8333          | 18.4468 | 47.3665  | 66.84              | 5.00               | 0.949              | 47.3736 | 0.0001 |              |             |       |                     |           |       |        |
| 6                          | 0.5     | 0.5     | 600                | 300              | 900                 | 300              | 48.0244          | 18.3543 | 47.6501  | 55.54              | 6.25               | 0.966              | 47.6257 | 0.0006 |              |             |       |                     |           |       |        |
| 7                          | 0.4     | 0.6     | 600                | 240              | 840                 | 360              | 48.3447          | 18.4520 | 47.8727  | 44.43              | 7.50               | 0.977              | 47.8364 | 0.0013 |              |             |       |                     |           |       |        |
| 8                          | 0.3     | 0.7     | 600                | 180              | 780                 | 420              | 48.5406          | 18.4568 | 48.0638  | 33.32              | 8.75               | 0.985              | 48.0225 | 0.0017 |              |             |       |                     |           |       |        |
| 9                          | 0.2     | 0.8     | 600                | 120              | 720                 | 480              | 48.7109          | 18.4507 | 48.2402  | 22.21              | 10.00              | 0.991              | 48.1929 | 0.0022 |              |             |       |                     |           |       |        |
| 10                         | 0.1     | 0.9     | 600                | 60               | 660                 | 540              | 48.8576          | 18.4450 | 48.3926  | 11.11              | 11.25              | 0.996              | 48.2525 | 0.0016 |              |             |       |                     |           |       |        |
| 11                         | 0       | 1       | 600                | 0                | 600                 | 0                | 49.0095          | 18.4769 | 48.5046  | 0.00               | 12.50              | 1.000              | 48.5046 | 0.0000 |              |             |       |                     |           |       |        |
| total vol of stock         |         |         |                    |                  |                     | 3300             | 3300             |         |          |                    |                    | 3.30               |         |        | ss residuals | 0.0160      |       |                     |           |       |        |
| $\rho$ uncorrected         |         |         |                    |                  |                     |                  |                  |         |          |                    |                    |                    |         |        |              |             |       |                     |           |       |        |
| $\rho$                     | 39.2081 | 48.5046 |                    |                  | 47.3025             |                  |                  |         |          |                    |                    |                    |         |        |              |             |       |                     |           |       |        |
| conc / M                   | 11.074  | 12.438  |                    |                  |                     |                  |                  |         |          |                    |                    |                    |         |        |              |             |       |                     |           |       |        |
| FW                         | 84.16   | 119.38  |                    |                  |                     |                  |                  |         |          |                    |                    |                    |         |        |              |             |       |                     |           |       |        |
| density                    | 0.779   | 1.492   |                    |                  |                     |                  |                  |         |          |                    |                    |                    |         |        |              |             |       |                     |           |       |        |
| N sites                    | 12      | 1       |                    |                  |                     |                  |                  |         |          |                    |                    |                    |         |        |              |             |       |                     |           |       |        |
| <b>Phosphine Oxide</b>     |         |         |                    |                  |                     |                  |                  |         |          |                    |                    |                    |         |        |              |             |       |                     |           |       |        |
|                            |         |         |                    |                  |                     | C6H12            | CHCl3            |         |          |                    |                    |                    |         |        |              |             |       |                     |           |       |        |
| FW                         | 218.32  |         | weight / g         |                  |                     | 0.0119           | 0.0109           |         |          |                    |                    |                    |         |        |              |             |       |                     |           |       |        |
| p                          | 97%     |         | weight solvent / g |                  |                     | 3.8685           | 6.7866           |         |          |                    |                    |                    |         |        |              |             |       |                     |           |       |        |
|                            |         |         | V solvent / mL     |                  |                     | 4.9680           | 4.5487           |         |          |                    |                    |                    |         |        |              |             |       |                     |           |       |        |
|                            |         |         | conc / mM          |                  |                     | 10.6468          | 10.6468          |         |          |                    |                    |                    |         |        |              |             |       |                     |           |       |        |
| <b>External Reference</b>  |         |         |                    |                  |                     |                  |                  |         |          |                    |                    |                    |         |        |              |             |       |                     |           |       |        |
| Methylenediphosphonic acid |         |         |                    |                  |                     |                  |                  |         |          |                    |                    |                    |         |        |              |             |       |                     |           |       |        |
| $\rho$ / ppm               | 17.98   |         |                    |                  |                     |                  |                  |         |          |                    |                    |                    |         |        |              |             |       |                     |           |       |        |
| FW                         | 176.00  |         |                    |                  |                     |                  |                  |         |          |                    |                    |                    |         |        |              |             |       |                     |           |       |        |
| weight / g                 | 0.0177  |         |                    |                  |                     |                  |                  |         |          |                    |                    |                    |         |        |              |             |       |                     |           |       |        |
| V / mL                     | 2       |         |                    |                  |                     |                  |                  |         |          |                    |                    |                    |         |        |              |             |       |                     |           |       |        |
| conc / mM                  | 50.28   |         |                    |                  |                     |                  |                  |         |          |                    |                    |                    |         |        |              |             |       |                     |           |       |        |

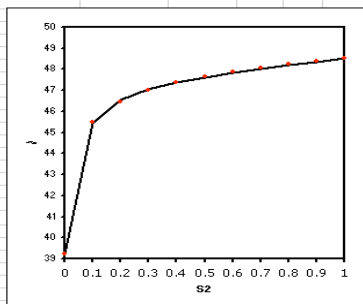

| Expt                       | C6H12   |         | CHCl3              |                  | vol total / $\mu$ l | C6H12            |                  | CHCl3   |          | $\rho_{exp}$ / ppm | $\rho_{ref}$ / ppm | $\rho_{exp}$ / ppm | [S1]    | [S2]   | [A-S2]       | $\rho$ calc | error | $\Delta G$ / kJ/mol | Kb2 / M-1 | error |        |
|----------------------------|---------|---------|--------------------|------------------|---------------------|------------------|------------------|---------|----------|--------------------|--------------------|--------------------|---------|--------|--------------|-------------|-------|---------------------|-----------|-------|--------|
|                            | S1      | S2      | vol S1 / $\mu$ l   | vol S2 / $\mu$ l |                     | vol S1 / $\mu$ l | vol S2 / $\mu$ l | 1.2421  | 2.51E-02 |                    |                    |                    |         |        |              |             |       |                     |           |       | 0.0401 |
| 1                          | 1       | 0       | 600                | 0                | 600                 | 0                | 39.6331          | 18.4459 | 39.1652  | 11.07              | 0.00               | 0.000              | 39.1652 | 0.0000 |              |             |       |                     |           |       |        |
| 2                          | 0.9     | 0.1     | 600                | 60               | 660                 | 540              | 45.9542          | 18.4488 | 45.4854  | 39.37              | 1.25               | 0.758              | 45.4331 | 0.0027 |              |             |       |                     |           |       |        |
| 3                          | 0.8     | 0.2     | 600                | 120              | 720                 | 480              | 46.9087          | 18.4465 | 46.4422  | 88.86              | 2.50               | 0.876              | 46.5100 | 0.0046 |              |             |       |                     |           |       |        |
| 4                          | 0.7     | 0.3     | 600                | 180              | 780                 | 420              | 47.4526          | 18.4526 | 46.9800  | 77.75              | 3.75               | 0.924              | 47.0210 | 0.0017 |              |             |       |                     |           |       |        |
| 5                          | 0.6     | 0.4     | 600                | 240              | 840                 | 360              | 47.8304          | 18.4465 | 47.3639  | 66.84              | 5.00               | 0.950              | 47.3548 | 0.0001 |              |             |       |                     |           |       |        |
| 6                          | 0.5     | 0.5     | 600                | 300              | 900                 | 300              | 48.1076          | 18.4466 | 47.6390  | 55.54              | 6.25               | 0.966              | 47.6106 | 0.0006 |              |             |       |                     |           |       |        |
| 7                          | 0.4     | 0.6     | 600                | 240              | 840                 | 360              | 48.3430          | 18.4562 | 47.8668  | 44.43              | 7.50               | 0.977              | 47.8250 | 0.0017 |              |             |       |                     |           |       |        |
| 8                          | 0.3     | 0.7     | 600                | 180              | 780                 | 420              | 48.5362          | 18.4591 | 48.0571  | 33.32              | 8.75               | 0.985              | 48.0149 | 0.0018 |              |             |       |                     |           |       |        |
| 9                          | 0.2     | 0.8     | 600                | 120              | 720                 | 480              | 48.7103          | 18.4501 | 48.2402  | 22.21              | 10.00              | 0.991              | 48.1891 | 0.0026 |              |             |       |                     |           |       |        |
| 10                         | 0.1     | 0.9     | 600                | 60               | 660                 | 540              | 48.8609          | 18.4473 | 48.3936  | 11.11              | 11.25              | 0.996              | 48.2526 | 0.0017 |              |             |       |                     |           |       |        |
| 11                         | 0       | 1       | 600                | 0                | 600                 | 0                | 49.0036          | 18.4750 | 48.5026  | 0.00               | 12.50              | 1.000              | 48.5026 | 0.0000 |              |             |       |                     |           |       |        |
| total vol of stock         |         |         |                    |                  |                     | 3300             | 3300             |         |          |                    |                    | 3.34               |         |        | ss residuals | 0.0177      |       |                     |           |       |        |
| $\rho$ uncorrected         |         |         |                    |                  |                     |                  |                  |         |          |                    |                    |                    |         |        |              |             |       |                     |           |       |        |
| $\rho$                     | 39.1652 | 48.5046 |                    |                  | 47.2665             |                  |                  |         |          |                    |                    |                    |         |        |              |             |       |                     |           |       |        |
| conc / M                   | 11.074  | 12.438  |                    |                  |                     |                  |                  |         |          |                    |                    |                    |         |        |              |             |       |                     |           |       |        |
| FW                         | 84.16   | 119.38  |                    |                  |                     |                  |                  |         |          |                    |                    |                    |         |        |              |             |       |                     |           |       |        |
| density                    | 0.779   | 1.492   |                    |                  |                     |                  |                  |         |          |                    |                    |                    |         |        |              |             |       |                     |           |       |        |
| N sites                    | 12      | 1       |                    |                  |                     |                  |                  |         |          |                    |                    |                    |         |        |              |             |       |                     |           |       |        |
| <b>Phosphine Oxide</b>     |         |         |                    |                  |                     |                  |                  |         |          |                    |                    |                    |         |        |              |             |       |                     |           |       |        |
|                            |         |         |                    |                  |                     | C6H12            | CHCl3            |         |          |                    |                    |                    |         |        |              |             |       |                     |           |       |        |
| FW                         | 218.32  |         | weight / g         |                  |                     | 0.0124           | 0.0102           |         |          |                    |                    |                    |         |        |              |             |       |                     |           |       |        |
| p                          | 97%     |         | weight solvent / g |                  |                     | 3.8752           | 6.1053           |         |          |                    |                    |                    |         |        |              |             |       |                     |           |       |        |
|                            |         |         | V solvent / mL     |                  |                     | 4.9746           | 4.0520           |         |          |                    |                    |                    |         |        |              |             |       |                     |           |       |        |
|                            |         |         | conc / mM          |                  |                     | 11.0750          | 11.0750          |         |          |                    |                    |                    |         |        |              |             |       |                     |           |       |        |
| <b>External Reference</b>  |         |         |                    |                  |                     |                  |                  |         |          |                    |                    |                    |         |        |              |             |       |                     |           |       |        |
| Methylenediphosphonic acid |         |         |                    |                  |                     |                  |                  |         |          |                    |                    |                    |         |        |              |             |       |                     |           |       |        |
| $\rho$ / ppm               | 17.98   |         |                    |                  |                     |                  |                  |         |          |                    |                    |                    |         |        |              |             |       |                     |           |       |        |
| FW                         | 176.00  |         |                    |                  |                     |                  |                  |         |          |                    |                    |                    |         |        |              |             |       |                     |           |       |        |
| weight / g                 | 0.0177  |         |                    |                  |                     |                  |                  |         |          |                    |                    |                    |         |        |              |             |       |                     |           |       |        |
| V / mL                     | 2       |         |                    |                  |                     |                  |                  |         |          |                    |                    |                    |         |        |              |             |       |                     |           |       |        |
| conc / mM                  | 50.28   |         |                    |                  |                     |                  |                  |         |          |                    |                    |                    |         |        |              |             |       |                     |           |       |        |

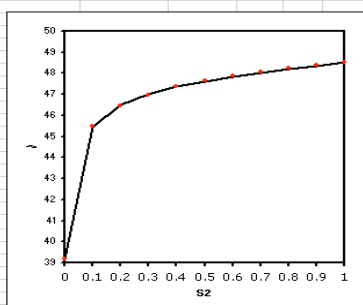

## 2.12. Dodecane-Chloroform

| Expt                       | Dodecane |         | CHCl <sub>3</sub>  |                  | vol total / $\mu$ l | Dodecane          |                  | CHCl <sub>3</sub>  |                    | $\rho_{exp}$ / ppm | $\rho_{ref}$ / ppm | $\rho_{calc}$ / ppm | [S1]    | [S2]   | [A-S2] | $\rho$ calc | error        | $\Delta G$ / kJ/mol | Kb2 / M-1 | error |                     |
|----------------------------|----------|---------|--------------------|------------------|---------------------|-------------------|------------------|--------------------|--------------------|--------------------|--------------------|---------------------|---------|--------|--------|-------------|--------------|---------------------|-----------|-------|---------------------|
|                            | S1       | S2      | vol S1 / $\mu$ l   | vol S2 / $\mu$ l |                     | vol S1 / $\mu$ l  | vol S2 / $\mu$ l | $\rho_{exp}$ / ppm | $\rho_{ref}$ / ppm |                    |                    |                     |         |        |        |             |              |                     |           |       | $\rho_{calc}$ / ppm |
| 1                          | 1        | 0       | 600                | 0                | 600                 | 0                 | 40.8946          | 19.0383            | 39.8363            | 114.48             | 0.000              | 0.000               | 39.8363 | 0.0000 |        |             |              |                     |           |       |                     |
| 2                          | 0.9      | 0.1     | 600                | 60               | 660                 | 60                | 47.0412          | 19.0372            | 45.9040            | 103.04             | 1.25               | 0.759               | 45.9418 | 0.0018 |        |             |              |                     |           |       |                     |
| 3                          | 0.8      | 0.2     | 600                | 120              | 720                 | 120               | 47.9599          | 19.0365            | 46.9034            | 91.59              | 2.50               | 0.876               | 46.9719 | 0.0047 |        |             |              |                     |           |       |                     |
| 4                          | 0.7      | 0.3     | 600                | 180              | 780                 | 180               | 48.4702          | 19.0399            | 47.4103            | 80.14              | 3.75               | 0.924               | 47.4483 | 0.0014 |        |             |              |                     |           |       |                     |
| 5                          | 0.6      | 0.4     | 600                | 240              | 840                 | 240               | 48.8036          | 19.0377            | 47.7459            | 68.63              | 5.00               | 0.950               | 47.7513 | 0.0000 |        |             |              |                     |           |       |                     |
| 6                          | 0.5      | 0.5     | 600                | 300              | 900                 | 300               | 49.0629          | 19.0362            | 48.0047            | 57.24              | 6.25               | 0.966               | 47.9790 | 0.0007 |        |             |              |                     |           |       |                     |
| 7                          | 0.4      | 0.6     | 600                | 360              | 960                 | 360               | 49.2839          | 19.0394            | 48.2075            | 45.79              | 7.50               | 0.977               | 48.1641 | 0.0018 |        |             |              |                     |           |       |                     |
| 8                          | 0.3      | 0.7     | 600                | 420              | 1020                | 420               | 49.4304          | 19.0583            | 48.3521            | 34.35              | 8.75               | 0.985               | 48.3263 | 0.0007 |        |             |              |                     |           |       |                     |
| 9                          | 0.2      | 0.8     | 600                | 480              | 1080                | 480               | 49.5776          | 19.0490            | 48.5086            | 22.90              | 10.00              | 0.991               | 48.4732 | 0.0013 |        |             |              |                     |           |       |                     |
| 10                         | 0.1      | 0.9     | 600                | 540              | 1140                | 540               | 49.6835          | 19.0408            | 48.6327            | 11.45              | 11.25              | 0.996               | 48.6095 | 0.0005 |        |             |              |                     |           |       |                     |
| 11                         | 0        | 1       | 600                | 600              | 1200                | 600               | 49.8060          | 19.0475            | 48.7395            | 0.00               | 12.50              | 1.000               | 48.7395 | 0.0000 |        |             |              |                     |           |       |                     |
| total vol of stock         |          |         |                    |                  | 3300                | 3300              |                  |                    |                    | 9.90               |                    |                     |         |        |        |             | ss residuals | 0.0130              |           |       |                     |
| $\rho$ uncorrected         |          |         |                    |                  |                     |                   |                  |                    |                    |                    |                    |                     |         |        |        |             |              |                     |           |       |                     |
| $\rho$                     | 39.8363  | 48.7395 |                    |                  | 47.7597             |                   |                  |                    |                    |                    |                    |                     |         |        |        |             |              |                     |           |       |                     |
| conc / M                   | 114.484  | 12.438  |                    |                  |                     |                   |                  |                    |                    |                    |                    |                     |         |        |        |             |              |                     |           |       |                     |
| FW                         | 170.33   | 119.38  |                    |                  |                     |                   |                  |                    |                    |                    |                    |                     |         |        |        |             |              |                     |           |       |                     |
| density                    | 0.75     | 1.492   |                    |                  |                     |                   |                  |                    |                    |                    |                    |                     |         |        |        |             |              |                     |           |       |                     |
| N sites                    | 26       | 1       |                    |                  |                     |                   |                  |                    |                    |                    |                    |                     |         |        |        |             |              |                     |           |       |                     |
| <b>Phosphine Oxide</b>     |          |         |                    |                  |                     |                   |                  |                    |                    |                    |                    |                     |         |        |        |             |              |                     |           |       |                     |
|                            |          |         |                    |                  | Dodecane            | CHCl <sub>3</sub> |                  |                    |                    |                    |                    |                     |         |        |        |             |              |                     |           |       |                     |
| FW                         | 218.32   |         | weight / g         |                  | 0.0107              | 0.0117            |                  |                    |                    |                    |                    |                     |         |        |        |             |              |                     |           |       |                     |
| p                          | 97%      |         | weight solvent / g |                  | 3.7470              | 8.1507            | 8.1618           |                    |                    |                    |                    |                     |         |        |        |             |              |                     |           |       |                     |
|                            |          |         | V solvent / mL     |                  | 4.9960              | 5.4629            | 5.4704           |                    |                    |                    |                    |                     |         |        |        |             |              |                     |           |       |                     |
|                            |          |         | conc / mM          |                  | 9.9157              | 9.9157            | 9.9227           |                    |                    |                    |                    |                     |         |        |        |             |              |                     |           |       |                     |
| <b>External Reference</b>  |          |         |                    |                  |                     |                   |                  |                    |                    |                    |                    |                     |         |        |        |             |              |                     |           |       |                     |
| Methylenediphosphonic acid |          |         |                    |                  |                     |                   |                  |                    |                    |                    |                    |                     |         |        |        |             |              |                     |           |       |                     |
| $M_d$ / ppm                | 17.96    |         |                    |                  |                     |                   |                  |                    |                    |                    |                    |                     |         |        |        |             |              |                     |           |       |                     |
| FW                         | 176.00   |         |                    |                  |                     |                   |                  |                    |                    |                    |                    |                     |         |        |        |             |              |                     |           |       |                     |
| weight / g                 | 0.0177   |         |                    |                  |                     |                   |                  |                    |                    |                    |                    |                     |         |        |        |             |              |                     |           |       |                     |
| V / mL                     | 2        |         |                    |                  |                     |                   |                  |                    |                    |                    |                    |                     |         |        |        |             |              |                     |           |       |                     |
| conc / mM                  | 50.28    |         |                    |                  |                     |                   |                  |                    |                    |                    |                    |                     |         |        |        |             |              |                     |           |       |                     |

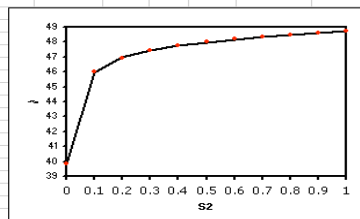

| Expt                       | Dodecane |         | CHCl <sub>3</sub>  |                  | vol total / $\mu$ l | Dodecane          |                  | CHCl <sub>3</sub>  |                    | $\rho_{exp}$ / ppm | $\rho_{ref}$ / ppm | $\rho_{calc}$ / ppm | [S1]    | [S2]   | [A-S2] | $\rho$ calc | error        | $\Delta G$ / kJ/mol | Kb2 / M-1 | error |                     |                  |
|----------------------------|----------|---------|--------------------|------------------|---------------------|-------------------|------------------|--------------------|--------------------|--------------------|--------------------|---------------------|---------|--------|--------|-------------|--------------|---------------------|-----------|-------|---------------------|------------------|
|                            | S1       | S2      | vol S1 / $\mu$ l   | vol S2 / $\mu$ l |                     | vol S1 / $\mu$ l  | vol S2 / $\mu$ l | $\rho_{exp}$ / ppm | $\rho_{ref}$ / ppm |                    |                    |                     |         |        |        |             |              |                     |           |       | $\rho_{calc}$ / ppm | $\Delta$ alpha 0 |
| 1                          | 1        | 0       | 600                | 0                | 600                 | 0                 | 40.8940          | 19.0399            | 39.4041            | 114.48             | 0.000              | 0.000               | 39.4041 | 0.0000 |        |             |              |                     |           |       |                     |                  |
| 2                          | 0.9      | 0.1     | 600                | 60               | 660                 | 60                | 46.9882          | 19.0477            | 45.9205            | 103.04             | 1.25               | 0.759               | 45.8800 | 0.0018 |        |             |              |                     |           |       |                     |                  |
| 3                          | 0.8      | 0.2     | 600                | 120              | 720                 | 120               | 47.9564          | 19.0482            | 46.8982            | 91.59              | 2.50               | 0.876               | 46.9506 | 0.0039 |        |             |              |                     |           |       |                     |                  |
| 4                          | 0.7      | 0.3     | 600                | 180              | 780                 | 180               | 48.4747          | 19.0581            | 47.3966            | 80.14              | 3.75               | 0.924               | 47.4414 | 0.0020 |        |             |              |                     |           |       |                     |                  |
| 5                          | 0.6      | 0.4     | 600                | 240              | 840                 | 240               | 48.8212          | 19.0474            | 47.7538            | 68.63              | 5.00               | 0.950               | 47.7507 | 0.0000 |        |             |              |                     |           |       |                     |                  |
| 6                          | 0.5      | 0.5     | 600                | 300              | 900                 | 300               | 49.0631          | 19.0459            | 48.0023            | 57.24              | 6.25               | 0.966               | 47.9900 | 0.0005 |        |             |              |                     |           |       |                     |                  |
| 7                          | 0.4      | 0.6     | 600                | 360              | 960                 | 360               | 49.2700          | 19.0566            | 48.1934            | 45.79              | 7.50               | 0.977               | 48.1670 | 0.0007 |        |             |              |                     |           |       |                     |                  |
| 8                          | 0.3      | 0.7     | 600                | 420              | 1020                | 420               | 49.4361          | 19.0438            | 48.3723            | 34.35              | 8.75               | 0.985               | 48.3289 | 0.0019 |        |             |              |                     |           |       |                     |                  |
| 9                          | 0.2      | 0.8     | 600                | 480              | 1080                | 480               | 49.5748          | 19.0410            | 48.5138            | 22.90              | 10.00              | 0.991               | 48.4747 | 0.0015 |        |             |              |                     |           |       |                     |                  |
| 10                         | 0.1      | 0.9     | 600                | 540              | 1140                | 540               | 49.6853          | 19.0490            | 48.6263            | 11.45              | 11.25              | 0.996               | 48.6096 | 0.0003 |        |             |              |                     |           |       |                     |                  |
| 11                         | 0        | 1       | 600                | 600              | 1200                | 600               | 49.8257          | 19.0700            | 48.7387            | 0.00               | 12.50              | 1.000               | 48.7387 | 0.0000 |        |             |              |                     |           |       |                     |                  |
| total vol of stock         |          |         |                    |                  | 3300                | 3300              |                  |                    |                    | 9.25               |                    |                     |         |        |        |             | ss residuals | 0.0124              |           |       |                     |                  |
| $\rho$ uncorrected         |          |         |                    |                  |                     |                   |                  |                    |                    |                    |                    |                     |         |        |        |             |              |                     |           |       |                     |                  |
| $\rho$                     | 39.4041  | 48.7387 |                    |                  | 47.7907             |                   |                  |                    |                    |                    |                    |                     |         |        |        |             |              |                     |           |       |                     |                  |
| conc / M                   | 114.484  | 12.438  |                    |                  |                     |                   |                  |                    |                    |                    |                    |                     |         |        |        |             |              |                     |           |       |                     |                  |
| FW                         | 170.33   | 119.38  |                    |                  |                     |                   |                  |                    |                    |                    |                    |                     |         |        |        |             |              |                     |           |       |                     |                  |
| density                    | 0.75     | 1.492   |                    |                  |                     |                   |                  |                    |                    |                    |                    |                     |         |        |        |             |              |                     |           |       |                     |                  |
| N sites                    | 26       | 1       |                    |                  |                     |                   |                  |                    |                    |                    |                    |                     |         |        |        |             |              |                     |           |       |                     |                  |
| <b>Phosphine Oxide</b>     |          |         |                    |                  |                     |                   |                  |                    |                    |                    |                    |                     |         |        |        |             |              |                     |           |       |                     |                  |
|                            |          |         |                    |                  | Dodecane            | CHCl <sub>3</sub> |                  |                    |                    |                    |                    |                     |         |        |        |             |              |                     |           |       |                     |                  |
| FW                         | 218.32   |         | weight / g         |                  | 0.0112              | 0.0102            |                  |                    |                    |                    |                    |                     |         |        |        |             |              |                     |           |       |                     |                  |
| p                          | 97%      |         | weight solvent / g |                  | 3.7297              | 6.7572            | 6.7426           |                    |                    |                    |                    |                     |         |        |        |             |              |                     |           |       |                     |                  |
|                            |          |         | V solvent / mL     |                  | 4.9729              | 4.5289            | 4.5192           |                    |                    |                    |                    |                     |         |        |        |             |              |                     |           |       |                     |                  |
|                            |          |         | conc / mM          |                  | 10.0665             | 10.0665           | 10.0291          |                    |                    |                    |                    |                     |         |        |        |             |              |                     |           |       |                     |                  |
| <b>External Reference</b>  |          |         |                    |                  |                     |                   |                  |                    |                    |                    |                    |                     |         |        |        |             |              |                     |           |       |                     |                  |
| Methylenediphosphonic acid |          |         |                    |                  |                     |                   |                  |                    |                    |                    |                    |                     |         |        |        |             |              |                     |           |       |                     |                  |
| $M_d$ / ppm                | 17.96    |         |                    |                  |                     |                   |                  |                    |                    |                    |                    |                     |         |        |        |             |              |                     |           |       |                     |                  |
| FW                         | 176.00   |         |                    |                  |                     |                   |                  |                    |                    |                    |                    |                     |         |        |        |             |              |                     |           |       |                     |                  |
| weight / g                 | 0.0177   |         |                    |                  |                     |                   |                  |                    |                    |                    |                    |                     |         |        |        |             |              |                     |           |       |                     |                  |
| V / mL                     | 2        |         |                    |                  |                     |                   |                  |                    |                    |                    |                    |                     |         |        |        |             |              |                     |           |       |                     |                  |
| conc / mM                  | 50.28    |         |                    |                  |                     |                   |                  |                    |                    |                    |                    |                     |         |        |        |             |              |                     |           |       |                     |                  |

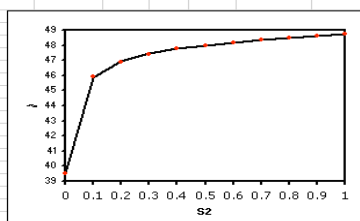



## 2.13. Octane-Chloroform

| Expt                       | Octane |         | CHCl3            |                    | vol total / $\mu$ l | Octane           |                  | CHCl3              |                    | $\rho_{exp}$ / ppm | $\rho_{ref}$ / ppm | $\rho_{calc}$ / ppm | [S1]         | [S2]   | [A-S2] | $\rho$ calc | error | $\Delta G$ / kJ/mol | Kb2 / M-1 | error |                     |                     |
|----------------------------|--------|---------|------------------|--------------------|---------------------|------------------|------------------|--------------------|--------------------|--------------------|--------------------|---------------------|--------------|--------|--------|-------------|-------|---------------------|-----------|-------|---------------------|---------------------|
|                            | S1     | S2      | vol S1 / $\mu$ l | vol S2 / $\mu$ l   |                     | vol S1 / $\mu$ l | vol S2 / $\mu$ l | $\rho_{exp}$ / ppm | $\rho_{ref}$ / ppm |                    |                    |                     |              |        |        |             |       |                     |           |       | $\rho_{calc}$ / ppm | $\Delta G$ / kJ/mol |
| 1                          | 1      | 0       | 600              | 0                  | 600                 | 0                | 41.099           | 19.0380            | 40.0519            | 10.78              | 0.00               | 0.000               | 40.0519      | 0.0000 |        |             |       |                     |           |       |                     |                     |
| 2                          | 0.9    | 0.1     | 600              | 60                 | 600                 | 60               | 47.0439          | 19.0467            | 45.3752            | 93.70              | 1.25               | 0.752               | 45.3381      | 0.0014 |        |             |       |                     |           |       |                     |                     |
| 3                          | 0.8    | 0.2     | 600              | 120                | 600                 | 120              | 47.9672          | 19.0467            | 46.9005            | 88.62              | 2.50               | 0.872               | 46.9551      | 0.0030 |        |             |       |                     |           |       |                     |                     |
| 4                          | 0.7    | 0.3     | 600              | 180                | 600                 | 180              | 48.4508          | 19.0535            | 47.3773            | 77.54              | 3.75               | 0.921               | 47.4255      | 0.0023 |        |             |       |                     |           |       |                     |                     |
| 5                          | 0.6    | 0.4     | 600              | 240                | 600                 | 240              | 48.7999          | 19.0481            | 47.7318            | 66.47              | 5.00               | 0.948               | 47.7237      | 0.0001 |        |             |       |                     |           |       |                     |                     |
| 6                          | 0.5    | 0.5     | 600              | 300                | 600                 | 300              | 48.0337          | 19.0454            | 47.9683            | 55.39              | 6.25               | 0.965               | 47.9459      | 0.0005 |        |             |       |                     |           |       |                     |                     |
| 7                          | 0.4    | 0.6     | 600              | 240                | 600                 | 360              | 48.2226          | 19.0560            | 48.1566            | 44.31              | 7.50               | 0.976               | 48.1276      | 0.0008 |        |             |       |                     |           |       |                     |                     |
| 8                          | 0.3    | 0.7     | 600              | 180                | 600                 | 420              | 49.3827          | 19.0614            | 48.3113            | 33.23              | 8.75               | 0.985               | 48.2855      | 0.0007 |        |             |       |                     |           |       |                     |                     |
| 9                          | 0.2    | 0.8     | 600              | 120                | 600                 | 480              | 49.5332          | 19.0511            | 48.4621            | 22.16              | 10.00              | 0.991               | 48.4280      | 0.0012 |        |             |       |                     |           |       |                     |                     |
| 10                         | 0.1    | 0.9     | 600              | 60                 | 600                 | 540              | 49.6587          | 19.0494            | 48.5893            | 11.08              | 11.25              | 0.996               | 48.5600      | 0.0009 |        |             |       |                     |           |       |                     |                     |
| 11                         | 0      | 1       | 600              | 0                  | 600                 | 600              | 49.7758          | 19.0712            | 48.6846            | 0.00               | 12.50              | 1.000               | 48.6846      | 0.0000 |        |             |       |                     |           |       |                     |                     |
|                            |        |         |                  |                    | total vol of stock  |                  | 3300             | 3300               |                    |                    | 8.83               |                     | ss residuals |        | 0.0108 |             |       |                     |           |       |                     |                     |
| 92 uncorrected             |        |         |                  |                    |                     |                  |                  |                    |                    |                    |                    |                     |              |        |        |             |       |                     |           |       |                     |                     |
| $\rho$                     |        | 40.0519 | 48.6846          |                    |                     | 47.7439          |                  |                    |                    |                    |                    |                     |              |        |        |             |       |                     |           |       |                     |                     |
| conc / M                   |        | 110.777 | 12.438           |                    |                     |                  |                  |                    |                    |                    |                    |                     |              |        |        |             |       |                     |           |       |                     |                     |
| FW                         |        | 114.23  | 119.38           |                    |                     |                  |                  |                    |                    |                    |                    |                     |              |        |        |             |       |                     |           |       |                     |                     |
| density                    |        | 0.703   | 1.492            |                    |                     |                  |                  |                    |                    |                    |                    |                     |              |        |        |             |       |                     |           |       |                     |                     |
| N sites                    |        | 18      | 1                |                    |                     |                  |                  |                    |                    |                    |                    |                     |              |        |        |             |       |                     |           |       |                     |                     |
| Phosphine Oxide            |        |         |                  |                    |                     |                  |                  |                    |                    |                    |                    |                     |              |        |        |             |       |                     |           |       |                     |                     |
|                            |        |         |                  | Octane             |                     | CHCl3            |                  |                    |                    |                    |                    |                     |              |        |        |             |       |                     |           |       |                     |                     |
| FW                         |        | 218.32  |                  | weight / g         | 0.0133              | 0.0178           |                  |                    |                    |                    |                    |                     |              |        |        |             |       |                     |           |       |                     |                     |
| p                          |        | 97%     |                  | weight solvent / g | 3.5230              | 10.0068          | 10.0008          |                    |                    |                    |                    |                     |              |        |        |             |       |                     |           |       |                     |                     |
|                            |        |         |                  | V solvent / mL     | 5.0114              | 6.7070           | 6.7029           |                    |                    |                    |                    |                     |              |        |        |             |       |                     |           |       |                     |                     |
|                            |        |         |                  | conc / mM          | 11.7916             | 11.7916          | 11.7908          |                    |                    |                    |                    |                     |              |        |        |             |       |                     |           |       |                     |                     |
| External Reference         |        |         |                  |                    |                     |                  |                  |                    |                    |                    |                    |                     |              |        |        |             |       |                     |           |       |                     |                     |
| Methylenediphosphonic acid |        |         |                  |                    |                     |                  |                  |                    |                    |                    |                    |                     |              |        |        |             |       |                     |           |       |                     |                     |
| $M^d$ / ppm                |        | 17.98   |                  |                    |                     |                  |                  |                    |                    |                    |                    |                     |              |        |        |             |       |                     |           |       |                     |                     |
| FW                         |        | 176.00  |                  |                    |                     |                  |                  |                    |                    |                    |                    |                     |              |        |        |             |       |                     |           |       |                     |                     |
| weight / g                 |        | 0.0177  |                  |                    |                     |                  |                  |                    |                    |                    |                    |                     |              |        |        |             |       |                     |           |       |                     |                     |
| V / mL                     |        | 2       |                  |                    |                     |                  |                  |                    |                    |                    |                    |                     |              |        |        |             |       |                     |           |       |                     |                     |
| conc / mM                  |        | 50.28   |                  |                    |                     |                  |                  |                    |                    |                    |                    |                     |              |        |        |             |       |                     |           |       |                     |                     |

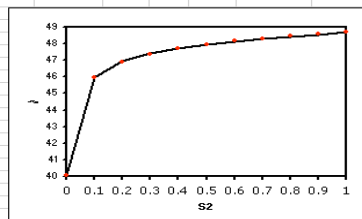

| Expt                       | Octane |         | CHCl3            |                    | vol total / $\mu$ l | Octane           |                  | CHCl3              |                    | $\rho_{exp}$ / ppm | $\rho_{ref}$ / ppm | $\rho_{calc}$ / ppm | [S1]         | [S2]   | [A-S2] | $\rho$ calc | error | $\Delta G$ / kJ/mol | Kb2 / M-1 | error |                     |                     |
|----------------------------|--------|---------|------------------|--------------------|---------------------|------------------|------------------|--------------------|--------------------|--------------------|--------------------|---------------------|--------------|--------|--------|-------------|-------|---------------------|-----------|-------|---------------------|---------------------|
|                            | S1     | S2      | vol S1 / $\mu$ l | vol S2 / $\mu$ l   |                     | vol S1 / $\mu$ l | vol S2 / $\mu$ l | $\rho_{exp}$ / ppm | $\rho_{ref}$ / ppm |                    |                    |                     |              |        |        |             |       |                     |           |       | $\rho_{calc}$ / ppm | $\Delta G$ / kJ/mol |
| 1                          | 1      | 0       | 600              | 0                  | 600                 | 0                | 41.1675          | 19.0420            | 40.1055            | 10.78              | 0.00               | 0.000               | 40.1055      | 0.0000 |        |             |       |                     |           |       |                     |                     |
| 2                          | 0.9    | 0.1     | 600              | 60                 | 600                 | 60               | 47.0620          | 19.0414            | 45.9676            | 99.70              | 1.25               | 0.745               | 45.9266      | 0.0017 |        |             |       |                     |           |       |                     |                     |
| 3                          | 0.8    | 0.2     | 600              | 120                | 600                 | 120              | 47.9667          | 19.0415            | 46.9052            | 88.62              | 2.50               | 0.868               | 46.9652      | 0.0036 |        |             |       |                     |           |       |                     |                     |
| 4                          | 0.7    | 0.3     | 600              | 180                | 600                 | 180              | 48.4679          | 19.0443            | 47.4036            | 77.54              | 3.75               | 0.918               | 47.4464      | 0.0018 |        |             |       |                     |           |       |                     |                     |
| 5                          | 0.6    | 0.4     | 600              | 240                | 600                 | 240              | 48.8083          | 19.0392            | 47.7491            | 66.47              | 5.00               | 0.946               | 47.7506      | 0.0000 |        |             |       |                     |           |       |                     |                     |
| 6                          | 0.5    | 0.5     | 600              | 300                | 600                 | 300              | 49.0489          | 19.0402            | 47.9097            | 55.39              | 6.25               | 0.963               | 47.9763      | 0.0002 |        |             |       |                     |           |       |                     |                     |
| 7                          | 0.4    | 0.6     | 600              | 240                | 600                 | 360              | 49.2444          | 19.0415            | 48.1829            | 44.31              | 7.50               | 0.975               | 48.1603      | 0.0005 |        |             |       |                     |           |       |                     |                     |
| 8                          | 0.3    | 0.7     | 600              | 180                | 600                 | 420              | 49.4336          | 19.0421            | 48.3715            | 33.23              | 8.75               | 0.984               | 48.3194      | 0.0027 |        |             |       |                     |           |       |                     |                     |
| 9                          | 0.2    | 0.8     | 600              | 120                | 600                 | 480              | 49.5707          | 19.0412            | 48.5095            | 22.16              | 10.00              | 0.991               | 48.4627      | 0.0022 |        |             |       |                     |           |       |                     |                     |
| 10                         | 0.1    | 0.9     | 600              | 60                 | 600                 | 540              | 49.6866          | 19.0404            | 48.6262            | 11.08              | 11.25              | 0.996               | 48.5950      | 0.0010 |        |             |       |                     |           |       |                     |                     |
| 11                         | 0      | 1       | 600              | 0                  | 600                 | 600              | 49.7866          | 19.0469            | 48.7197            | 0.00               | 12.50              | 1.000               | 48.7197      | 0.0000 |        |             |       |                     |           |       |                     |                     |
|                            |        |         |                  |                    | total vol of stock  |                  | 3300             | 3300               |                    |                    | 8.81               |                     | ss residuals |        | 0.0137 |             |       |                     |           |       |                     |                     |
| 92 uncorrected             |        |         |                  |                    |                     |                  |                  |                    |                    |                    |                    |                     |              |        |        |             |       |                     |           |       |                     |                     |
| $\rho$                     |        | 40.1055 | 48.7197          |                    |                     | 47.7970          |                  |                    |                    |                    |                    |                     |              |        |        |             |       |                     |           |       |                     |                     |
| conc / M                   |        | 110.777 | 12.438           |                    |                     |                  |                  |                    |                    |                    |                    |                     |              |        |        |             |       |                     |           |       |                     |                     |
| FW                         |        | 114.23  | 119.38           |                    |                     |                  |                  |                    |                    |                    |                    |                     |              |        |        |             |       |                     |           |       |                     |                     |
| density                    |        | 0.703   | 1.492            |                    |                     |                  |                  |                    |                    |                    |                    |                     |              |        |        |             |       |                     |           |       |                     |                     |
| N sites                    |        | 18      | 1                |                    |                     |                  |                  |                    |                    |                    |                    |                     |              |        |        |             |       |                     |           |       |                     |                     |
| Phosphine Oxide            |        |         |                  |                    |                     |                  |                  |                    |                    |                    |                    |                     |              |        |        |             |       |                     |           |       |                     |                     |
|                            |        |         |                  | Octane             |                     | CHCl3            |                  |                    |                    |                    |                    |                     |              |        |        |             |       |                     |           |       |                     |                     |
| FW                         |        | 218.32  |                  | weight / g         | 0.0109              | 0.0143           |                  |                    |                    |                    |                    |                     |              |        |        |             |       |                     |           |       |                     |                     |
| p                          |        | 97%     |                  | weight solvent / g | 3.5286              | 9.8248           | 9.836            |                    |                    |                    |                    |                     |              |        |        |             |       |                     |           |       |                     |                     |
|                            |        |         |                  | V solvent / mL     | 5.0193              | 6.8260           | 6.8225           |                    |                    |                    |                    |                     |              |        |        |             |       |                     |           |       |                     |                     |
|                            |        |         |                  | conc / mM          | 9.6495              | 9.6495           | 9.6375           |                    |                    |                    |                    |                     |              |        |        |             |       |                     |           |       |                     |                     |
| External Reference         |        |         |                  |                    |                     |                  |                  |                    |                    |                    |                    |                     |              |        |        |             |       |                     |           |       |                     |                     |
| Methylenediphosphonic acid |        |         |                  |                    |                     |                  |                  |                    |                    |                    |                    |                     |              |        |        |             |       |                     |           |       |                     |                     |
| $M^d$ / ppm                |        | 17.98   |                  |                    |                     |                  |                  |                    |                    |                    |                    |                     |              |        |        |             |       |                     |           |       |                     |                     |
| FW                         |        | 176.00  |                  |                    |                     |                  |                  |                    |                    |                    |                    |                     |              |        |        |             |       |                     |           |       |                     |                     |
| weight / g                 |        | 0.0177  |                  |                    |                     |                  |                  |                    |                    |                    |                    |                     |              |        |        |             |       |                     |           |       |                     |                     |
| V / mL                     |        | 2       |                  |                    |                     |                  |                  |                    |                    |                    |                    |                     |              |        |        |             |       |                     |           |       |                     |                     |
| conc / mM                  |        | 50.28   |                  |                    |                     |                  |                  |                    |                    |                    |                    |                     |              |        |        |             |       |                     |           |       |                     |                     |

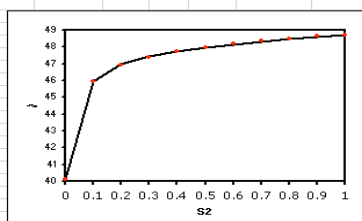

Supplement: b927107d.pdf [file b927107d.pdf]
